# Supplementary material for: A highly efficient designer cell for enantioselective reduction of ketones
Source: Royal Society of Chemistry journal article supplement (doi:10.1039/c4cy01017e), 2014-09-15
Supplement: c4cy01017e1.pdf [file c4cy01017e1.pdf]

## Supplementary Information

### A highly efficient designer cell for enantioselective reduction of ketones

Gautam Srivastava,<sup>a,b</sup> Mohan Pal,<sup>a,c</sup> Suneet Kaur<sup>a</sup> and Ravinder S. Jolly\*<sup>a</sup>

<sup>a</sup>Department of Chemistry, CSIR-Institute of Microbial Technology, Sector 39, Chandigarh 160 036, India. Fax: (+) 91-0172-269-0585; E-mail: [jolly@imtech.res.in](mailto:jolly@imtech.res.in)

<sup>b</sup>Present address: Department of Structural Biology, Weizmann Institute of Science, Rehovot 76100, Israel

<sup>c</sup>Present address: Department of Biochemistry and Molecular Biology, Dalhousie University, Halifax, NS B3H 4R2, Canada.

| Contents                                                                                                                                | Page |
|-----------------------------------------------------------------------------------------------------------------------------------------|------|
| 1. Demonstration of the expression of surf- <i>crs</i> on the surface of designer cell                                                  | 2S   |
| 2. Relative expression levels of cytoplasmic and surface expressed <i>crs</i> in recombinant <i>E. coli</i>                             | 4S   |
| 3. SDS-PAGE showing expression of surf- <i>crs</i> , surf- <i>gdh</i> , cyto- <i>crs</i> and cyto- <i>gdh</i> by various designer cells | 6S   |
| 4. Analytical methods and experimental procedures                                                                                       | 7S   |
| 4.1 General notes                                                                                                                       |      |
| 4.2 Enzymes and chemicals                                                                                                               |      |
| 4.3 Enzyme assays                                                                                                                       |      |
| 4.4 Experimental procedures                                                                                                             | 8S   |
| 4.4.1 General procedure for the preparation of biocatalyst                                                                              |      |
| 4.4.2 Relative activity of surf- <i>crs</i> - <i>gdh</i> and cyto- <i>crs</i> - <i>gdh</i> for ketones                                  |      |
| 4.4.3 Preparative scale biocatalytic reduction of ketones <b>1a-f</b> and <b>3a-h</b>                                                   | 9S   |
| 4.5 List of primers                                                                                                                     |      |
| 4.6 Construction of plasmids                                                                                                            | 18S  |
| 4.7 Expression of the recombinant protein in <i>E. coli</i> strain                                                                      | 21S  |
| 4.8 Demonstration of cell surface display of <i>crs</i> and <i>gdh</i>                                                                  | 21S  |
| 4.9 Immuno-localization of carbonyl reductase in <i>E. coli</i> BL21(DE3)                                                               | 21S  |
| 4.9.1 anti- <i>crs</i> polyclonal antibody                                                                                              |      |
| 4.9.2 Western blotting                                                                                                                  |      |
| 4.9.3 Transmission electron microscopy                                                                                                  |      |
| 5. Plasmid maps                                                                                                                         | 23S  |
| 6. HPLC traces                                                                                                                          | 25S  |
| 7. NMR spectra                                                                                                                          | 29S  |
| 8. Gene sequence listing                                                                                                                | 43S  |
| 9. Reference section                                                                                                                    | 64S  |

## 1. Demonstration of the expression of *surf-crs* on the surface of designer cell

The recombinant cells grown in 100 mL culture media were isolated by centrifugation and washed with 50 mM phosphate buffer (pH- 7.0). The cells were then suspended in 5 mL lysis buffer (50 mM NaH<sub>2</sub>PO<sub>4</sub>, 150 mM NaCl, 1mg mL<sup>-1</sup> Lysozyme, pH 8.0) for 30 min at 4 °C. The cell suspension was sonicated with 30 sec pulse on and 30 sec pulse off at 4 °C for 20 min. The cell debris was removed by centrifugation at 14,000 rpm for 30 min. The supernatant (cell-free extract) was then subjected to ultra-centrifugation at 1,00,000g for 2 h at 4 °C for separation of membrane fraction and soluble fraction. The sediment containing the membrane fraction was washed with the same buffer and re-suspended in membrane solubilization buffer (25 mM Tris HCl, 20% Glycerol and 2% Triton X100, pH 7.5). All three fractions, cell-free extract, membrane fraction and soluble protein fraction were assayed for their activity using ethyl 4-chloro-3-oxobutyrate (ECOB) (**1a**) as substrate. In brief, the reaction mixture (1 mL) in 50 mM phosphate buffer pH 7.0, containing 0.2 mM NADPH, 2.0 mM **1a** and 1-50 µl of the sample was incubated at 30 °C and the total activity was determined.<sup>1</sup> The results have been summarized in Table 1S. As expected, most of the activity was recovered from membrane fraction. Significantly, membrane fraction of the *E. coli* BL21 (DE3) + *pET23(a)* (negative control) was devoid of any activity.

**Table 1S:** Carbonyl reductase (crs) activity of various fractions obtained from *E. coli* BL21(DE3) + *pET23(a)* and *E. coli* BL21 + *pET 23(a)-omp-crs*.

| Entry | Fractions of <i>E. coli</i> | <i>E. coli</i> BL21(DE3) + <i>pET 23(a)</i> , (negative control)<br>Total activity (nmol/min) | <i>E. coli</i> BL21(DE3) + <i>pET 23(a)-omp-crs</i> , Total activity<br>(nmol/min) |
|-------|-----------------------------|-----------------------------------------------------------------------------------------------|------------------------------------------------------------------------------------|
| 1     | Cell-free extract           | 376                                                                                           | 1673                                                                               |
| 2     | Soluble fraction            | 76                                                                                            | 350                                                                                |
| 3     | Membrane fraction           | 0.0                                                                                           | 1192                                                                               |

The presence of crs on the surface of *E. coli* BL21(DE3) + *pET 23(a)-omp-crs* was further confirmed by EM immunogold labeling studies carried out with ultrathin sections of expressed *E. coli* BL21(DE3) + *pET 23(a)-omp-crs* cells as described in detail in Experimental Section. Briefly, *anti-crs* polyclonal antibody was raised against the purified crs in rabbit and was assayed for their specificity by Western blotting. The purified crs was run on SDS-PAGE under the reducing condition and after electro-blotting on to nitrocellulose

membrane was probed with rabbit anti-*crs* polyclonal antibody which was further probed with alkaline phosphatase conjugated goat *anti-rabbit IgG* (whole molecule) secondary antibody. The blot was then developed by dipping in the substrate solution containing 5-bromo-4-chloro-3-indolyl phosphate (BCIP, 0.15 mg/mL), nitro blue tetrazolium (NBT, 0.30 mg/mL), tris-HCl (100 mM) and MgCl<sub>2</sub> (5 mM), pH 9.5 for 10 min.<sup>1, 2</sup> The polyclonal antibody that specifically labeled pure *crs* (Lane 2, Figure 1S) was also able to specifically label *omp-crs* (Lane 4, Figure 1S).

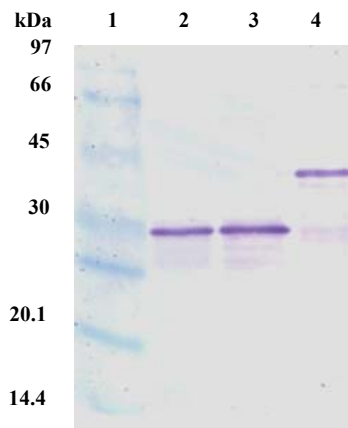

**Figure 1S. Specificity of *anti-crs* Ab against *crs* by Western blotting.** Lane 1: Molecular weight marker, Lane 2- Purified *crs*, Lane 3- Whole cell proteome of *E. coli* BL21(DE3) + *pET23(a)-crs*, Lane 4- Whole cell proteome of *E. coli* BL21(DE3) + *pET23(a)-omp-crs*.

After several dehydration steps, cells of recombinant *E. coli* BL21(DE3) + *pET 23(a)* (negative control) and *E. coli* BL21(DE3) + *pET 23(a)-omp-crs* were embedded in LR white resin, which was then dehydrated in several steps using 0.2% glutaraldehyde as fixative. Thin sections cut using an ultramicrotome were incubated with rabbit anti-*crs* polyclonal antibody followed by nanogold-labeled goat *anti-rabbit IgG* (whole molecule) secondary antibody and visualized under the transmission electron microscope. Different fields were observed and the gold particles were found to be exclusively present on the surface of the cells (Figure 2S b-c). No labeling occurred with cells used as the negative control (Figure 2S a).

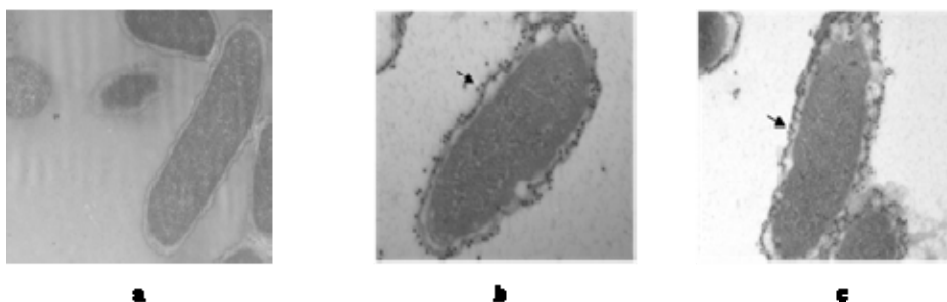

**Figure 2S. Transmission electron micrograph of ‘Designer whole-cell biocatalyst’.** ‘Designer whole-cell biocatalyst’ was probed with rabbit anti-*crs* polyclonal antibody followed by nanogold labeled goat *anti-rabbit IgG* (whole molecule) secondary antibody. Arrowheads denote gold particles. (a) *E. coli* BL21(DE3) + *pET 23(a)* (negative control), (b) & (c) *E. coli* BL21(DE3) + *pET 23(a)-omp-crs*.

## 2. Relative expression levels of cytoplasmic and surface expressed *crs* in recombinant *E. coli*

Fresh culture of recombinant *E. coli* BL21(DE3) + *pET 23(a)* (negative control), *E. coli* BL21(DE3) + *pET 23(a)-crs* and *E. coli* BL21(DE3) + *pET 23(a)-omp-crs* were grown and the whole cell proteome was run on 12.5% SDS-PAGE under reducing condition (Figure 3S). To the naked eye, the intracellular expression of *crs* (Lane 1, Figure 3S) appeared to be much higher than the surface expressed *crs* (Lane 9, Figure 3S). There were no expression in induced (Lane 3 & 7, Figure 3S) and uninduced (Lane 4 & 6, Figure 3S) *E. coli* BL21(DE3) + *pET 23(a)* (negative control). For quantitative determination, the proteome obtained from various concentrations of cells was run on 12.5% SDS-PAGE under reducing conditions. After electro blotting on to nitrocellulose membrane, it was probed with rabbit *anti-crs* polyclonal antibody, which was further probed with alkaline phosphatase conjugated goat *anti rabbit IgG* antibody. Probing with antibody was followed by developing the blot by dipping in the substrate solution containing 5-bromo-4-chloro-3-indolyl phosphate (BCIP, 0.15 mg mL<sup>-1</sup>), nitro blue tetrazolium (NBT, 0.30 mg mL<sup>-1</sup>), Tris HCl (100 mM) and MgCl<sub>2</sub> (5 mM), pH 9.5 for 10 min (Figure 4S).<sup>2</sup> The expression of the *crs* was determined by analyzing the band intensity by software Scion Image of the corresponding clone. The intensity was plotted against amount of the cells taken and the slope (dy/dx) for the intracellular expression (Figure 5S a) and surface expression (Figure 5S b) compared. The expression of *crs* on the surface of the cells as *omp-crs* fusion protein was found to be 17.9-fold less as compared to *crs* expressed in the cytoplasm.

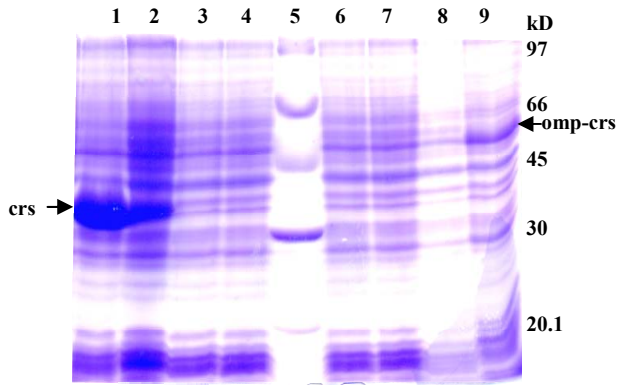

**Figure 3S**

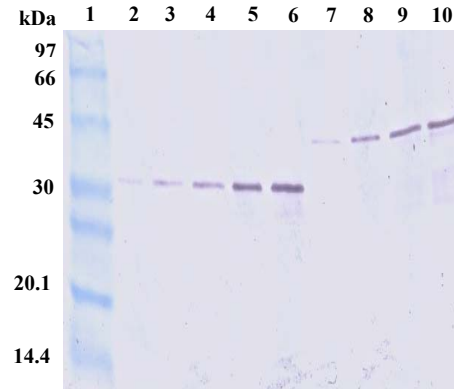

**Figure 4S**

**Figure 3S. Expression level of crs.** Lane 1- Induced *E.coli* BL21(DE3) + *pET 23(a) -crs*, Lane 2- Uninduced *E.coli* BL21(DE3) + *pET 23(a) -crs*, Lane 3 & 7- Induced *E.coli* BL21(DE3) + *pET 23(a)*, Lane 4 & 6- Uninduced *E.coli* BL21(DE3) + *pET 23(a)*, Lane 5- Molecular weight marker, Lane 8- Uninduced *E.coli* BL21 + *pET 23(a) -omp-crs*, Lane 9- Induced *E.coli* BL21 + *pET 23(a) -omp-crs*.

**Figure 4S. Quantitative expression level of crs.** Lane 1-Molecular weight marker, Lane 2 to 6- cell free extract from 0.75, 1.5, 3, 6 and 12 x 10<sup>-5</sup> OD cells of *E. coli* BL21(DE3) + *pET23(a)-crs*, Lane 7 to 10- cell free extract from 18.75, 37.5, 75 and 150 x 10<sup>-5</sup> OD cells of *E. coli* BL21(DE3) + *pET23(a)-omp-crs*.

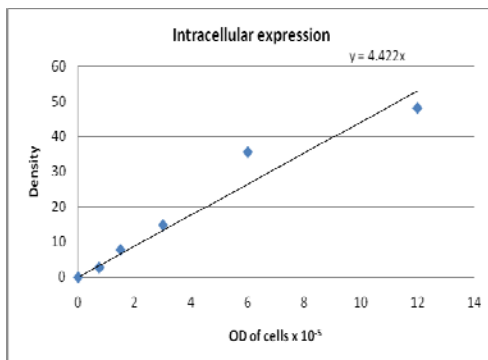

**a**

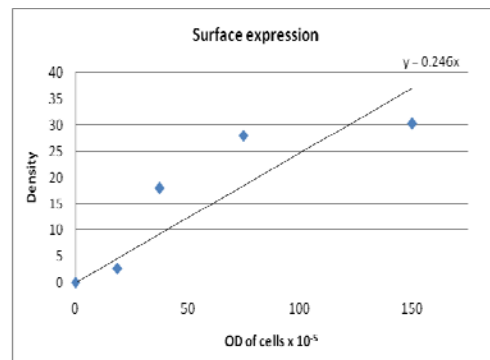

**b**

**Figure 5S. Quantification of crs expression level.** Intensity of the bands in Figure 16 was determined by Scion Image and plotted against optical density of the cell. (a) *E. coli* BL21(DE3) + *pET23(a)-crs* and (b) *E. coli* BL21(DE3) + *pET23(a)-omp-crs*.

3. SDS-PAGE showing expression of surf-crs, surf-gdh, cyto-crs and cyto-gdh by various designer cells

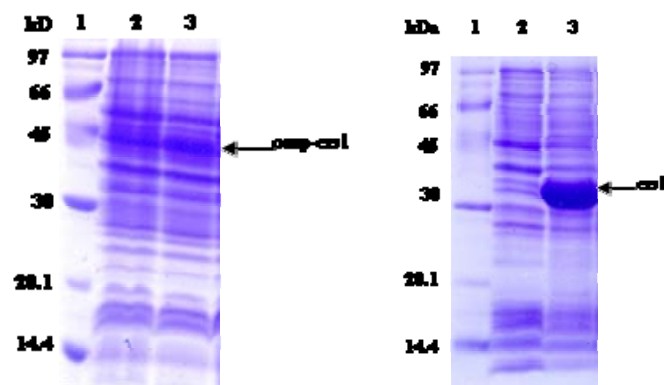

Figure 6S

Figure 7S

**Figure 6S. Expression of surf-crs fusion protein.** Lane 1- Molecular weight marker, Lane 2- Induced *E. coli* BL21(DE3) + *pET 23(a)*, Lane 3- Induced *E. coli* BL21 + *pET 23(a)-omp-crs*. Arrow is representing the expression of 44.45 kD omp-crs fusion protein.

**Figure 7S. Expression of cyto-crs.** Lane 1- Molecular weight marker, Lane 2- Induced *E. coli* BL21(DE3) + *pET 23(a) -crs* and Lane 3- Induced *E. coli* BL21(DE3) + *pET 23(a)-crs*.

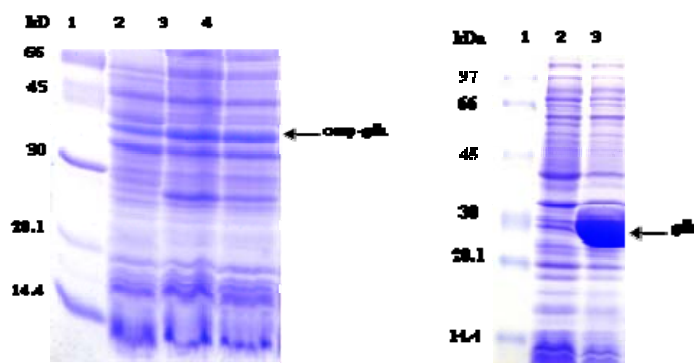

Figure 8S

Figure 9S

**Figure 8S. Expression of surf-gdh fusion protein.** Lane 1- Molecular weight marker, Lane 2- Induced *E. coli* BL21(DE3) + *pET 29(a)*, lane 3 & 4- Induced *E. coli* BL21 + *pET 29(a)-omp-gdh*. Arrow is representing the expression of 42.2 kD omp-gdh fusion protein.

**Figure 9S. Expression of cyto-gdh.** Lane 1- Molecular weight marker, Lane 2- Induced *E. coli* BL21(DE3) + *pET 29(a)* and Lane 3- Induced *E. coli* BL21(DE3) + *pET 29(a)-gdh*.

## 4. Analytical Methods and Experimental procedures

### 4.1. General Notes

Polymerase chain reaction was performed by Eppendorf thermocycler. All solvents used for flash chromatography and synthesis were purified before use. Thin layer chromatography (TLC) was used for monitoring the reaction and for comparison with authentic samples. Aluminium sheets pre-coated with silica-gel 60 F<sub>254</sub> of Merck, Germany (Product no. 105554) were used for TLC. Separated compounds were visualized by exposure to iodine vapors or by staining with 1% KMNO<sub>4</sub> and 2% sodium bicarbonate aqueous solution followed by heating with heat gun (250 °C) for few seconds. Flash chromatography was performed on silica gel (200-400 mesh). NMRs were run on Jeol ECX 300 NMR spectrometer using CDCl<sub>3</sub> as solvent. Chemical shifts are reported as downfield from TMS used as internal standard. Values of coupling constants *J* are reported in Hz. HPLC was done using Dionex Summit HPLC system equipped with high pressure gradient dual pump, manual injector, variable temperature column compartment and PDA detector. Analysis was done using chromeleon<sup>®</sup> version 6.50 software. Optical rotation was recorded on the Polarimeter (Autopol IV, Rudolph Research, USA). All evaporation of solvents was done at 40 °C under reduced pressure on BÜCHI Rotavapor-R114, Switzerland. Protein purification was performed on FPLC (Amersham Biosciences AKTA prime). Spectrophotometric analysis was done on Perkin Elmer, Lambda 25 UV/VIS spectrometer.

### 4.2 Enzymes and chemicals

Recombinant DNA procedures were carried out using standard procedures.<sup>3</sup> Enzymes required for molecular biology were purchased from *New England BioLabs* (United Kingdom) and used as recommended. QIAprep Spin Miniprep Kit for plasmid isolation, QIAquick Gel Extraction Kit for extraction of DNA from the agarose gel and Ni-NTA Agarose for purification of 6xHis-tagged proteins was purchased from *Qiagen* and used according to the manufacturer protocol. Antibiotic penicillin and kanamycin was purchased from Sigma-Aldrich. PD-10 column used for desalting of protein was from GE Healthcare.

NADPH, ethyl 4-chloro-3-oxobutanoate (**1a**), ethyl 3-oxobutanoate (**1c**) and 1-(4-nitrophenyl)ethanone (**1n**) were purchased from Sigma-Aldrich. Acetophenone (**1g**) and 1-(4-chlorophenyl)ethanone (**1h**) were from Lanchater, UK. NADP, monosodium salt was from

SISCO, India. All other ketones (**1b**, **1d**, **1f**, **1i-1m**) used in this study were from Acros Organics, USA. Solvents including HPLC solvents and all other chemicals were from Merck Specialties Pvt Ltd, India. Racemic alcohols were prepared by borohydride reduction of corresponding ketone.

### 4.3. Enzyme assays

**Assay for carbonyl reductase (crs) activity:** Whole-cell biocatalyst ( $10^6$ - $10^7$  cells) was added to 1 mL of reaction mixture consisting of 50 mM phosphate buffer, pH 6.5, 2 mM **1a**, 0.2 mM NADPH and the reaction monitored spectrophotometrically at 340 nm (molar absorption coefficient of  $6800 \text{ M}^{-1}\text{cm}^{-1}$ ) for the oxidation of NADPH.<sup>1</sup>

**Assay for glucose dehydrogenase (gdh) activity:** Whole-cell biocatalyst ( $10^6$ - $10^7$  cells) was added to 1 mL of reaction mixture consisting of 100 mM tris-HCl buffer, pH 8.0, 10 mM glucose, 0.5 mM  $\text{NADP}^+$  and the reaction monitored spectrophotometrically at 340 nm (molar absorption coefficient of  $6800 \text{ M}^{-1}\text{cm}^{-1}$ ) for the reduction of  $\text{NADP}^+$ .<sup>4</sup>

### 4.4 Experimental procedures

**4.4.1. General procedure for the preparation of biocatalyst:** Chemically competent cells of *E. coli* BL21(DE3) or *E. coli* C41(DE3)<sup>7,8</sup> were transformed with the plasmid pETDuet1-GJSCG or pETDuet1-GJCCG (Figure 1) as described previously.<sup>3</sup> The plasmid pETDuet1-GJSCG encoded for an artificial surf-crs and artificial surf-gdh, which coexpress crs and gdh, respectively on the surface of the cell. The plasmid pETDuet1-GJCCG encoded for cyto-crs and cyto-gdh, which coexpress crs and gdh, respectively in the cytoplasm of cell. Active cells were prepared by incubation of a single colony of *E. coli* in 5 mL LB medium containing antibiotics supplement ( $100 \mu\text{gL}^{-1}$  ampicillin) with shaking (200 rpm) at 37 °C for 12 h. The culture was diluted 1:100 with fresh LB medium containing antibiotic supplement and incubated with shaking (200 rpm) at 37 °C. When the OD at 600 nm reached to 0.4-0.6, the culture was induced with 0.2 mM IPTG and culture incubated further at 37 °C for 16 h at 20 °C. The cells were harvested by centrifugation washed with 50 mM phosphate buffer (pH 6.5) and stored at 4 °C.



**4.4.2. Relative activity of surf-crs-gdh and cyto-crs-gdh for ketones (1a-f and 3a-h):** The assays were done in 96-well ELISA plate. The reaction mixture consisting of 0.2 mM nicotinamide adenine dinucleotide phosphate, reduced (NADPH), 2.0 mM substrate, 50 $\mu$ g/ml *Escherichia coli* cells (for calculation of cell mass, OD<sub>600</sub> = 1 of cell suspension was taken as equivalent to 0.25 mg/ml dry cell weight) in 50 mM phosphate buffer, pH 7.0 was incubated at 30 °C for about 30 min to 12 hr depending upon the consumption of the substrate. The consumption of nicotinamide adenine dinucleotide phosphate, reduced (NADPH) was monitored by decrease in the absorbance at  $\lambda_{340}$ .

**4.4.3. Preparative scale biocatalytic reduction of ketones 1a-f to chiral alcohols 2a-f and ketones 3a-h to alcohols 4a-h:**

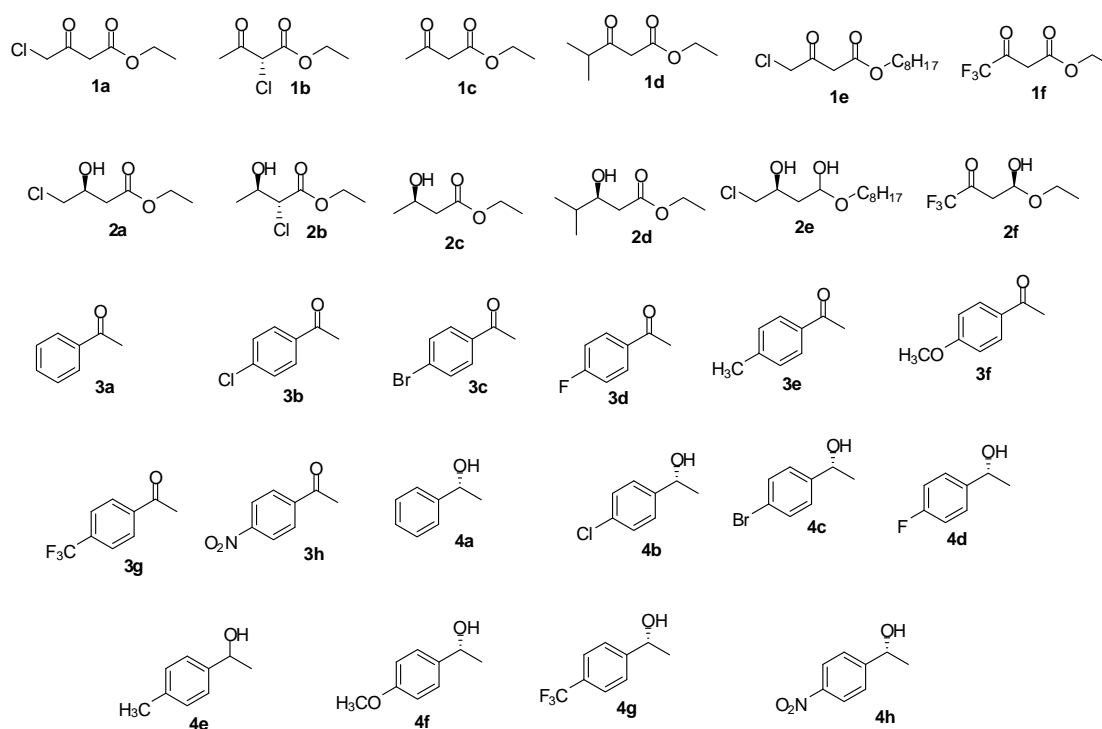

**4.4.3.1. Biocatalytic reduction of Ethyl 4-chloro-3-oxobutyrates (1a):** An auto titrator apparatus equipped with a magnetic stirrer was charged with aq. phosphate buffer solution (20 mL, 100 mM; pH 6.5) followed by sequential addition of recombinant *E. coli* (0.4 g, wet biomass),  $\beta$ -NADP, mono sodium salt (7.65 mg, 10 nmol) and D-glucose (5.4 g, 30 mmol). The contents were mixed by gentle stirring at 30 °C and a solution of **1a** (3.29 g, 20 mmol) in di-n-butyl ether (7 mL) added drop wise over a period of 1 h maintaining the temperature at 30 °C and pH at 6.5 with 5N NaOH. While maintaining the pH at 6.5 and temperature at 30 °C, the stirring was continued for another 9.5 h when TLC of reaction showed absence of

starting material. For TLC, an aliquot of 0.1 mL was withdrawn in an eppendorf tube and thoroughly mixed with equal volume of ethyl acetate. The organic phase was separated by centrifugation and subjected to analysis by TLC. After completion of reaction, the product was extracted in ethyl acetate (3x25mL), washed once with brine (10 mL), dried over anhyd. sodium sulfate and solvents removed to leave a pale yellow residue, which was further purified by flash chromatography over silica gel (200-400 mesh) to obtain **2a** (3.18 g; Yield 95.5%). <sup>1</sup>H NMR (300 MHz, CDCl<sub>3</sub>): 1.28 (3H, t, *J* = 7.2 Hz); 2.63 (3H, m); 3.61 (2H, dd, *J* = 7.2, 5.4 Hz); 4.18 (2H, q, *J* = 7.2 Hz); 4.23 (1H, m). <sup>13</sup>C NMR (75 MHz, CDCl<sub>3</sub>): 14.20, 38.58, 48.22, 61.11, 68.03, 171.89. Ee >99%, determined by HPLC (Chiralcel OB-H, λ<sub>217</sub>, hexane:isopropanol 96:4, 1 ml/min). Retention time 14.3. The absolute configuration was assigned as (*S*) based on comparison of optical rotation with literature. [α]<sub>D</sub><sup>25</sup> = -22.1 (c = 8.72, CHCl<sub>3</sub>) [lit.<sup>5</sup> (*R*) [α]<sub>D</sub><sup>25</sup> = +20.1 (c = 8.24, CHCl<sub>3</sub>) 96% ee].

**4.4.3.2. Biocatalytic reduction of Ethyl 2-chloro-3-oxobutyrate (1b):** An auto titrator apparatus equipped with a magnetic stirrer was charged with aq. phosphate buffer solution (20 mL, 100 mM; pH 6.5) followed by sequential addition of recombinant *E. coli* (0.4 g, wet biomass), β-NADP, mono sodium salt (7.65 mg, 10 nmol) and D-glucose (5.4 g, 30 mmol). The contents were mixed by gentle stirring at 30 °C and a solution of **1b** (3.29 g, 20 mmol) in di-*n*-butyl ether (7 mL) added drop wise over a period of 1 h maintaining the temperature at 30 °C and pH at 6.5 with 5N NaOH. While maintaining the pH at 6.5 and temperature at 30 °C, the stirring was continued for another 10 h when TLC of reaction showed absence of starting material. For TLC, an aliquot of 0.1 mL was withdrawn in an eppendorf tube and thoroughly mixed with equal volume of ethyl acetate. The organic phase was separated by centrifugation and subjected to analysis by TLC. After completion of reaction, the product was extracted in ethyl acetate (3x25mL), washed once with brine (10 mL), dried over anhyd. sodium sulfate and solvents removed to leave a residue, which was further purified by flash chromatography over silica gel (200-400 mesh) to obtain **2b** (3.02 g; Yield 90.7%). <sup>1</sup>H NMR (300 MHz, CDCl<sub>3</sub>): 1.34 (m, 6H); 4.25 (m, 4H). <sup>13</sup>C NMR (75 MHz, CDCl<sub>3</sub>): 14.09, 19.25, 61.00, 62.42, 69.08, 168.74. De 98% *anti*, determined by GLC (Factorfour<sup>TM</sup> Varian, 30m x 0.25mm, 140 °C, N<sub>2</sub> 1 kg min<sup>-1</sup>, Detection FID), retention time 8.90; Ee >98%, determined by GLC (betaDex<sup>TM</sup> Supelco, 30m x 0.25mm, 140 °C, N<sub>2</sub> 1 kg min<sup>-1</sup>, Detection FID), retention time 13.1; tentatively assigned (*2R, 3R*) configuration based on comparison of optical rotation with literature. [α]<sub>D</sub><sup>25</sup> = -3.8 (c = 1.13, CHCl<sub>3</sub>). [lit.<sup>6</sup> (*2S,3S*)[α]<sub>D</sub><sup>25</sup> = +4.0 (c = 1.1, CHCl<sub>3</sub>), 97% de, 99% ee].

**4.4.3.3. Biocatalytic reduction of Ethyl 3-oxobutyrate (1c):** An auto titrator apparatus equipped with a magnetic stirrer was charged with aq. phosphate buffer solution (20 mL, 100 mM; pH 6.5) followed by sequential addition of recombinant *E. coli* (1.0 g, wet biomass),  $\beta$ -NADP, mono sodium salt (7.65 mg, 10 nmol) and D-glucose (5.4 g, 30 mmol). The contents were mixed by gentle stirring at 30 °C and a solution of **1c** (2.60 g, 20 mmol) in di-n-butyl ether (7 mL) added drop wise over a period of 1 h maintaining the temperature at 30 °C and pH at 6.5 with 5N NaOH. While maintaining the pH at 6.5 and temperature at 30 °C, the stirring was continued for another 27 h when TLC of reaction showed absence of starting material. For TLC, an aliquot of 0.1 mL was withdrawn in an eppendorf tube and thoroughly mixed with equal volume of ethyl acetate. The organic phase was separated by centrifugation and subjected to analysis by TLC. After completion of reaction, the product was extracted in ethyl acetate (3x25mL), washed once with brine (10 mL), dried over anhyd. sodium sulfate and solvents removed to leave a residue, which was further purified by flash chromatography over silica gel (200-400 mesh) to obtain **2c** (2.35g; Yield 89%).  $^1\text{H NMR}$  (300 MHz,  $\text{CDCl}_3$ ): 1.21 (3H, d,  $J = 6.5$  Hz); 1.26 (3H, t,  $J = 6.8$  Hz); 2.46 (2H, m); 3.00 (1H, bs); 4.16 (3H, m).  $^{13}\text{C NMR}$  (75 MHz,  $\text{CDCl}_3$ ): 14.27, 22.48, 42.80, 60.77, 64.34. Ee 95%, determined by HPLC (Chiralcel OB-H,  $\lambda_{217}$ , hexane:isopropanol 96:4, 1 ml/min). Retention time 9.4 min. Absolute configuration was assigned as (*R*) based on comparison of optical rotation with literature.  $[\alpha]_{\text{D}}^{25} = -44.2$  ( $c = 2.03$ ,  $\text{CHCl}_3$ ) [lit.<sup>7</sup> (*S*)  $[\alpha]_{\text{D}}^{25} = +32.8$  ( $c = 3.0$ ,  $\text{CHCl}_3$ ) 99% ee].

**4.4.3.4. Biocatalytic reduction of Ethyl 4-methyl-3-oxopentanoate (1d):** An auto titrator apparatus equipped with a magnetic stirrer was charged with aq. phosphate buffer solution (20 mL, 100 mM; pH 6.5) followed by sequential addition of recombinant *E. coli* (1.0 g, wet biomass),  $\beta$ -NADP, mono sodium salt (7.65 mg, 10 nmol) and D-glucose (5.4 g, 30 mmol). The contents were mixed by gentle stirring at 30 °C and a solution of **1d** (3.15g, 19.9 mmol) in di-n-butyl ether (7 mL) added drop wise over a period of 1 h maintaining the temperature at 30 °C and pH at 6.5 with 5N NaOH. While maintaining the pH at 6.5 and temperature at 30 °C, the stirring was continued for another 16 h when TLC of reaction showed absence of starting material. For TLC, an aliquot of 0.1 mL was withdrawn in an eppendorf tube and thoroughly mixed with equal volume of ethyl acetate. The organic phase was separated by centrifugation and subjected to analysis by TLC. After completion of reaction, the product was extracted in ethyl acetate (3x25mL), washed once with brine (10 mL), dried over anhyd. sodium sulfate and solvents removed to leave a residue, which was further purified by flash chromatography over silica gel (200-400 mesh) to obtain **2d** (2.93 g; Yield 91.9%).  $^1\text{H NMR}$

(300 MHz, CDCl<sub>3</sub>): 0.90 and 0.93 (each 3H, each t,  $J = 6.8$  Hz); 1.26 (3H, t,  $J = 7.2$  Hz); 1.69 (1H, m); 2.38 (1H, dd,  $J = 9.6, 16.5$  Hz); 2.52 (1H, dd,  $J = 2.8, 16.5$  Hz); 2.94 (1H, bs); 3.75 (1H, m); 4.14 (2H, q,  $J = 7.2$  Hz). <sup>13</sup>C NMR (75 MHz, CDCl<sub>3</sub>): 14.25, 17.83, 18.42, 33.24, 38.54, 60.79, 72.82, 173.62. Ee >99%, determined by HPLC (Chiralcel OD-H, λ<sub>217</sub>, hexane:isopropanol 95:5, 1 ml/min). Retention time 5.3 min. Absolute configuration was assigned as (*S*) based on comparison of optical rotation with literature.  $[\alpha]_{\text{D}}^{25} = -40.8$  (c = 2.56, CHCl<sub>3</sub>) [lit.<sup>8</sup> (*R*)  $[\alpha]_{\text{D}}^{20} = +34.3$  (c = 0.078, CHCl<sub>3</sub>) 83% ee].

**4.4.3.5. Biocatalytic reduction of Octyl 4-chloro-3-oxobutanoate (1e):** An auto titrator apparatus equipped with a magnetic stirrer was charged with aq. phosphate buffer solution (20 mL, 100 mM; pH 6.5) followed by sequential addition of recombinant *E. coli* (1.0 g, wet biomass), β-NADP, mono sodium salt (7.65 mg, 10 nmol) and D-glucose (5.4 g, 30 mmol). The contents were mixed by gentle stirring at 30 °C and a solution of **1e** (4.95g, 19.9 mmol) in di-n-butyl ether (7 mL) added drop wise over a period of 1 h maintaining the temperature at 30 °C and pH at 6.5 with 5N NaOH. While maintaining the pH at 6.5 and temperature at 30 °C, the stirring was continued for another 29 h when TLC of reaction showed absence of starting material. For TLC, an aliquot of 0.1 mL was withdrawn in an eppendorf tube and thoroughly mixed with equal volume of ethyl acetate. The organic phase was separated by centrifugation and subjected to analysis by TLC. After completion of reaction, the product was extracted in ethyl acetate (3x25mL), washed once with brine (10 mL), dried over anhyd. sodium sulfate and solvents removed to leave a residue, which was further purified by flash chromatography over silica gel (200-400 mesh) to obtain **2e** (4.39 g; Yield 88%). <sup>1</sup>H NMR (300 MHz, CDCl<sub>3</sub>): 0.86 (3H, t,  $J = 6.9$  Hz, H<sub>2</sub> CH<sub>3</sub>); 1.27 (10H, m, 5 x CH<sub>2</sub>); 1.61 (2H, m); 2.62 (2H, m); 3.60 (2H, m); 4.11 (2H, t,  $J = 6.8$  Hz); 4.14 (1H, m, H<sub>3</sub>). <sup>13</sup>C NMR (75 MHz, CDCl<sub>3</sub>): 14.16, 22.71, 25.94, 28.59, 29.24, 31.84, 38.50, 48.19, 65.35, 68.06, 172.02. Ee >99%, determined by HPLC (Chiralcel OB-H, λ<sub>217</sub>, hexane:isopropanol 96:4, 1 ml/min). Retention time 7.6 min. Absolute configuration was assigned as (*S*) based on comparison of optical rotation with literature  $[\alpha]_{\text{D}}^{25} = -15.9$  (c = 4.60, CHCl<sub>3</sub>) [lit.<sup>9</sup> (*R*)  $[\alpha]_{\text{D}}^{23} = +15.1$  (c = 4.66, CHCl<sub>3</sub>) 97% ee].

**4.4.3.6. Biocatalytic reduction of Ethyl 4,4,4-trifluoro-3-oxobutyrate (1f):** An auto titrator apparatus equipped with a magnetic stirrer was charged with aq. phosphate buffer solution (20 mL, 100 mM; pH 6.5) followed by sequential addition of recombinant *E. coli* (1.0 g, wet biomass), β-NADP, mono sodium salt (7.65 mg, 10 nmol) and D-glucose (2.7 g, 15 mmol).

The contents were mixed by gentle stirring at 30 °C and a solution of **1f** (1.84 g , 10 mmol) in di-n-butyl ether (7 mL) added drop wise over a period of 1 h maintaining the temperature at 30 °C and pH at 6.5 with 5N NaOH. While maintaining the pH at 6.5 and temperature at 30 °C, the stirring was continued for another 19 h when TLC of reaction showed absence of starting material. For TLC, an aliquot of 0.1 mL was withdrawn in an eppendorf tube and thoroughly mixed with equal volume of ethyl acetate. The organic phase was separated by centrifugation and subjected to analysis by TLC. After completion of reaction, the product was extracted in ethyl acetate (3x25mL), washed once with brine (10 mL), dried over anhyd. sodium sulfate and solvents removed to leave a residue, which was further purified by flash chromatography over silica gel (200-400 mesh) to obtain **2f** (1.59 g; Yield 85.5%). <sup>1</sup>H NMR (300 MHz, CDCl<sub>3</sub>): 1.29 (3H, t, *J* = 7.2 Hz); 2.70 (2H, m); 4.21 (2H, q, *J* = 7.2 Hz); 4.43 (1H, m). <sup>13</sup>C NMR (75 MHz, CDCl<sub>3</sub>): 14.06, 34.87, 61.68, 67.21 (q, *J* = 32 Hz), 124.51 (q, *J* = 289 Hz), 170.94. Ee and absolute configuration (*S*) was determined based on comparison of optical rotation with literature [ $\alpha$ ]<sub>D</sub><sup>25</sup> = -20.3 (c = 1.87, CHCl<sub>3</sub>) [lit.<sup>10</sup> [ $\alpha$ ]<sub>D</sub><sup>23</sup> = -12.1 (c = 1, CHCl<sub>3</sub>) 64.5% ee].

**4.4.3.7. Biocatalytic reduction of Acetophenone (3a):** An auto titrator apparatus equipped with a magnetic stirrer was charged with aq. phosphate buffer solution (20 mL, 100 mM; pH 6.5) followed by sequential addition of recombinant *E. coli* (1.0 g, wet biomass),  $\beta$ -NADP, mono sodium salt (7.65 mg, 10 nmol) and D-glucose (2.7 g, 15 mmol). The contents were mixed by gentle stirring at 30 °C and a solution of **3a** (1.20 g , 10 mmol) in di-n-butyl ether (7 mL) added drop wise over a period of 1 h maintaining the temperature at 30 °C and pH at 6.5 with 5N NaOH. While maintaining the pH at 6.5 and temperature at 30 °C, the stirring was continued for another 21 h when TLC of reaction showed absence of starting material. For TLC, an aliquot of 0.1 mL was withdrawn in an eppendorf tube and thoroughly mixed with equal volume of ethyl acetate. The organic phase was separated by centrifugation and subjected to analysis by TLC. After completion of reaction, the product was extracted in ethyl acetate (3x25mL), washed once with brine (10 mL), dried over anhyd. sodium sulfate and solvents removed to leave a residue, which was further purified by flash chromatography over silica gel (200-400 mesh) to obtain **4a** (1.09 g; Yield 89.2%). <sup>1</sup>H NMR (300 MHz, CDCl<sub>3</sub>): 1.49 (3H, d, *J* = 6.5 Hz); 2.10 (1H, bs); 4.87 (1H, q, *J* = 6.5 Hz); 7.35 (5H, m). <sup>13</sup>C NMR (75 MHz, CDCl<sub>3</sub>): 25.25, 70.53, 125.47, 127.58, 128.60, 145.88. Ee 99%, determined by HPLC (Chiralcel OB-H,  $\lambda_{217}$ , hexane:isopropanol 96:4, 1 ml/min). Retention time 9.2 min. Absolute configuration was assigned as (*R*) based on comparison of optical rotation with

literature.  $[\alpha]_{\text{D}}^{25} = +54.8$  ( $c = 2.74$ ,  $\text{CHCl}_3$ ) [lit.<sup>11</sup> (S)]  $[\alpha]_{\text{D}}^{25} = -49.5$  ( $c = 0.05$ ,  $\text{CH}_2\text{Cl}_2$ ) 97% ee].

**4.4.3.8. Biocatalytic reduction of 4-Chloroacetophenone (3b):** An auto titrator apparatus equipped with a magnetic stirrer was charged with aq. phosphate buffer solution (20 mL, 100 mM; pH 6.5) followed by sequential addition of recombinant *E. coli* (0.4 g, wet biomass),  $\beta$ -NADP, mono sodium salt (7.65 mg, 10 nmol) and D-glucose (2.7 g, 15 mmol). The contents were mixed by gentle stirring at 30 °C and a solution of **3b** (1.55 g, 10 mmol) in di-n-butyl ether (7 mL) added drop wise over a period of 1 h maintaining the temperature at 30 °C and pH at 6.5 with 5N NaOH. While maintaining the pH at 6.5 and temperature at 30 °C, the stirring was continued for another 23 h when TLC of reaction showed absence of starting material. For TLC, an aliquot of 0.1 mL was withdrawn in an eppendorf tube and thoroughly mixed with equal volume of ethyl acetate. The organic phase was separated by centrifugation and subjected to analysis by TLC. After completion of reaction, the product was extracted in ethyl acetate (3x25mL), washed once with brine (10 mL), dried over anhyd. sodium sulfate and solvents removed to leave a residue, which was further purified by flash chromatography over silica gel (200-400 mesh) to obtain **4b** (1.44 g; Yield 91.9%). <sup>1</sup>H NMR (300 MHz,  $\text{CDCl}_3$ ): 1.47 (3H, d,  $J = 6.5$  Hz); 2.1 (1H, bs, OH); 4.87 (1H, q,  $J = 6.5$  Hz); 7.31 (4H, s). <sup>13</sup>C NMR (75 MHz,  $\text{CDCl}_3$ ): 25.37, 69.85, 126.88, 128.69, 133.16, 144.33. Ee 99%, determined by HPLC (Chiralcel OB-H,  $\lambda_{217}$ , hexane:isopropanol 96:4, 1 ml/min). Retention time 10.5 min. Absolute configuration was assigned as (R) based on comparison of optical rotation with literature.  $[\alpha]_{\text{D}}^{25} = +49.2$  ( $c = 1.83$ , ether) [lit.<sup>11</sup> (S)]  $[\alpha]_{\text{D}}^{25} = -47.4$  ( $c = 0.06$ , ether) 94% ee].

**4.4.3.9. Biocatalytic reduction of 4-Bromoacetophenone (3c):** An auto titrator apparatus equipped with a magnetic stirrer was charged with aq. phosphate buffer solution (20 mL, 100 mM; pH 6.5) followed by sequential addition of recombinant *E. coli* (0.4 g, wet biomass),  $\beta$ -NADP, mono sodium salt (7.65 mg, 10 nmol) and D-glucose (4.32 g, 24 mmol). The contents were mixed by gentle stirring at 30 °C and a solution of **3c** (3.18 g, 16 mmol) in di-n-butyl ether (7 mL) added drop wise over a period of 1 h maintaining the temperature at 30 °C and pH at 6.5 with 5N NaOH. While maintaining the pH at 6.5 and temperature at 30 °C, the stirring was continued for another 23h when TLC of reaction showed absence of starting material. For TLC, an aliquot of 0.1 mL was withdrawn in an eppendorf tube and thoroughly mixed with equal volume of ethyl acetate. The organic phase was separated by centrifugation

and subjected to analysis by TLC. After completion of reaction, the product was extracted in ethyl acetate (3x25mL), washed once with brine (10 mL), dried over anhyd. sodium sulfate and solvents removed to leave a residue, which was further purified by flash chromatography over silica gel (200-400 mesh) to obtain **4c** (2.85 g; Yield 88.6%). <sup>1</sup>H NMR (300 MHz, CDCl<sub>3</sub>): 1.47 (3H, d, *J* = 6.5 Hz); 2.08 (1H, bs); 4.87 (1H, q, *J* = 6.5 Hz); 7.25 and 7.47 (each 2H, each d, *J* = 8.7 Hz). <sup>13</sup>C NMR (75 MHz, CDCl<sub>3</sub>): 25.34, 69.87, 121.25, 127.25, 131.64, 144.86. Ee 97%, determined by HPLC (Chiralcel OB-H, λ<sub>217</sub>, hexane:isopropanol 96:4, 1 ml/min). Retention time 11.4 min. Absolute configuration was assigned as (*R*) based on comparison of optical rotation with literature. [α]<sub>D</sub><sup>25</sup> = +38.3 (c = 1.55, CHCl<sub>3</sub>) [lit.<sup>11</sup> (*S*)] [α]<sub>D</sub><sup>25</sup> = -37.5 (c = 0.07, CHCl<sub>3</sub>) 96% ee].

**4.4.3.9. Biocatalytic reduction of 4-Fluoroacetophenone (3d):** An auto titrator apparatus equipped with a magnetic stirrer was charged with aq. phosphate buffer solution (20 mL, 100 mM; pH 6.5) followed by sequential addition of recombinant *E. coli* (0.4 g, wet biomass), NADP, mono sodium salt (7.65 mg, 10 nmol) and D-glucose (4.32 g, 24 mmol). The contents were mixed by gentle stirring at 30 °C and a solution of **3d** (2.21 g, 16 mmol) in di-n-butyl ether (7 mL) added drop wise over a period of 1 h maintaining the temperature at 30 °C and pH at 6.5 with 5N NaOH. While maintaining the pH at 6.5 and temperature at 30 °C, the stirring was continued for another 19 h when TLC of reaction showed absence of starting material. For TLC, an aliquot of 0.1 mL was withdrawn in an eppendorf tube and thoroughly mixed with equal volume of ethyl acetate. The organic phase was separated by centrifugation and subjected to analysis by TLC. After completion of reaction, the product was extracted in ethyl acetate (3x25mL), washed once with brine (10 mL), dried over anhyd. sodium sulfate and solvents removed to leave a residue, which was further purified by flash chromatography over silica gel (200-400 mesh) to obtain **4d** (2.01 g; Yield 89.7%). <sup>1</sup>H NMR (300 MHz, CDCl<sub>3</sub>): 1.49 (3H, d, *J* = 6.5 Hz); 2.03 (1H, bs); 4.89 (1H, q, *J* = 6.5 Hz); 7.01 and 7.03 (each 2H, each d, *J* = 8.6 Hz). <sup>13</sup>C NMR (75 MHz, CDCl<sub>3</sub>): 69.80, 115.26 (d, *J* = 24Hz), 127.14 (d, *J* = 7.9 Hz), 141.64, 162.17 (d, *J* = 243 Hz). Ee 97% determined by HPLC (Chiralcel OB-H, λ<sub>217</sub>, hexane:isopropanol 96:4, 1 ml/min). Retention time 8.8 min. Absolute configuration was assigned as (*R*) based on comparison of optical rotation with literature. [α]<sub>D</sub><sup>25</sup> = +48.8 (c = 1.4, CHCl<sub>3</sub>) [lit.<sup>11</sup> (*S*)] [α]<sub>D</sub><sup>25</sup> = -47.4 (c = 0.06, CHCl<sub>3</sub>) 97% ee].<sup>9, 10</sup>

**4.4.3.10. Biocatalytic reduction of 4-Methylacetophenone (3e):** An auto titrator apparatus equipped with a magnetic stirrer was charged with aq. phosphate buffer solution (20 mL, 100

mM; pH 6.5) followed by sequential addition of recombinant *E. coli* (1.0 g, wet biomass), NADP, mono sodium salt (7.65 mg, 10 nmol) and D-glucose (2.7 g, 15 mmol). The contents were mixed by gentle stirring at 30 °C and a solution of **3e** (1.35 g, 10.1 mmol) in di-n-butyl ether (7 mL) added drop wise over a period of 1 h maintaining the temperature at 30 °C and pH at 6.5 with 5N NaOH. While maintaining the pH at 6.5 and temperature at 30 °C, the stirring was continued for another 20 h when TLC of reaction showed absence of starting material. For TLC, an aliquot of 0.1 mL was withdrawn in an eppendorf tube and thoroughly mixed with equal volume of ethyl acetate. The organic phase was separated by centrifugation and subjected to analysis by TLC. After completion of reaction, the product was extracted in ethyl acetate (3x25mL), washed once with brine (10 mL), dried over anhyd. sodium sulfate and solvents removed to leave a residue, which was further purified by flash chromatography over silica gel (200-400 mesh) to obtain **4e** (1.17 g; Yield 85%). <sup>1</sup>H NMR (300 MHz, CDCl<sub>3</sub>): 1.48 (3H, d, *J* = 6.5 Hz); 2.01 (1H, bs); 2.38 (1H, s); 4.87 (1H, q, *J* = 6.5 Hz); 7.15 and 7.26 (each 2H, each d, *J* = 7.9 Hz). <sup>13</sup>C NMR (75 MHz, CDCl<sub>3</sub>): 21.19, 25.18, 70.37, 125.44, 129.26, 137.27, 142.95. Ee 99%, determined by HPLC (Chiralcel OB-H, λ<sub>217</sub>, hexane:isopropanol 95:5, 1 ml/min). Retention time 12.9 min. Absolute configuration was assigned as (*R*) based on comparison of optical rotation with literature. [α]<sub>D</sub><sup>25</sup> = +52.1 (c = 1.98, CHCl<sub>3</sub>) [lit.<sup>11</sup> (*S*)] [α]<sub>D</sub><sup>25</sup> = -51.1 (c = 1, CHCl<sub>3</sub>) 96% ee].

**4.4.3.11. Biocatalytic reduction of 4-Methoxyacetophenone (3f):** An auto titrator apparatus equipped with a magnetic stirrer was charged with aq. phosphate buffer solution (20 mL, 100 mM; pH 6.5) followed by sequential addition of recombinant *E. coli* (1.0 g, wet biomass), NADP, mono sodium salt (7.65 mg, 10 nmol) and D-glucose (2.7 g, 15 mmol). The contents were mixed by gentle stirring at 30 °C and a solution of **3f** (1.5 g, 10 mmol) in di-n-butyl ether (7 mL) added drop wise over a period of 1 h maintaining the temperature at 30 °C and pH at 6.5 with 5N NaOH. While maintaining the pH at 6.5 and temperature at 30 °C, the stirring was continued for another 29 h when TLC of reaction showed absence of starting material. For TLC, an aliquot of 0.1 mL was withdrawn in an eppendorf tube and thoroughly mixed with equal volume of ethyl acetate. The organic phase was separated by centrifugation and subjected to analysis by TLC. After completion of reaction, the product was extracted in ethyl acetate (3x25mL), washed once with brine (10 mL), dried over anhyd. sodium sulfate and solvents removed to leave a residue, which was further purified by flash chromatography over silica gel (200-400 mesh) to obtain **4f** (1.32 g; Yield 86.7%). <sup>1</sup>H NMR(300 MHz, CDCl<sub>3</sub>): 1.46 (3H, d, *J* = 6.5 Hz); 2.08 (1H, bs); 3.80 (3H, s); 4.84 (1H, q, *J* = 6.5 Hz); 6.86



and 7.28 (each 2H, each d,  $J = 8.2$ ).  $^{13}\text{C}$  NMR (75 MHz,  $\text{CDCl}_3$ ): 25.11, 55.39, 70.08, 113.94, 126.76, 138.09, 159.07. Ee and absolute configuration ( $R$ ) was determined based on comparison of optical rotation with literature.  $[\alpha]_{\text{D}}^{22} = +51.4$  (c 1.72,  $\text{CHCl}_3$ ) [lit.<sup>12</sup> ( $S$ )  $[\alpha]_{\text{D}}^{25} = -51.9$  (c 0.72,  $\text{CHCl}_3$ ) 99% ee].

**4.4.3.9. Biocatalytic reduction of 4-trifluoromethylacetophenone (3g):** An auto titrator apparatus equipped with a magnetic stirrer was charged with aq. phosphate buffer solution (20 mL, 100 mM; pH 6.5) followed by sequential addition of recombinant *E. coli* (0.4 g, wet biomass), NADP, mono sodium salt (7.65 mg, 10 nmol) and D-glucose (4.32 g, 24 mmol). The contents were mixed by gentle stirring at 30 °C and a solution of **3g** (3.0 g, 16 mmol) in di-n-butyl ether (7 mL) added drop wise over a period of 1 h maintaining the temperature at 30 °C and pH at 6.5 with 5N NaOH. While maintaining the pH at 6.5 and temperature at 30 °C, the stirring was continued for another 14 h when TLC of reaction showed absence of starting material. For TLC, an aliquot of 0.1 mL was withdrawn in an eppendorf tube and thoroughly mixed with equal volume of ethyl acetate. The organic phase was separated by centrifugation and subjected to analysis by TLC. After completion of reaction, the product was extracted in ethyl acetate (3x25mL), washed once with brine (10 mL), dried over anhyd. sodium sulfate and solvents removed to leave a residue, which was further purified by flash chromatography over silica gel (200-400 mesh) to obtain **4g** (2.86 g; Yield 94%).  $^1\text{H}$  NMR (300 MHz,  $\text{CDCl}_3$ ): 1.5 (3H, d,  $J = 6.51$  Hz); 2.33 (1H, bs); 4.98 (1H, q,  $J = 6.5$  Hz); 7.48 and 7.60 (each 2H, each d,  $J = 8.2$  Hz).  $^{13}\text{C}$  NMR (75 MHz,  $\text{CDCl}_3$ ): 25.49, 69.92, 125.51, 125.56, 125.73, 149.76. Ee and absolute configuration ( $R$ ) was determined based on comparison of optical rotation with literature.  $[\alpha]_{\text{D}}^{25} = +27.2$  (c 2.08, MeOH) [lit.<sup>12</sup> ( $S$ )  $[\alpha]_{\text{D}}^{22} = -28.1$  (c 1.13%, MeOH) 99% ee].

**4.4.3.9. Biocatalytic reduction of 4-Nitroacetophenone (3h):** An auto titrator apparatus equipped with a magnetic stirrer was charged with aq. phosphate buffer solution (20 mL, 100 mM; pH 6.5) followed by sequential addition of recombinant *E. coli* (0.4 g, wet biomass), NADP, mono sodium salt (7.65 mg, 10 nmol) and D-glucose (4.32 g, 24 mmol). The contents were mixed by gentle stirring at 30 °C and a solution of **3h** (2.64 g, 16 mmol) in di-n-butyl ether (7 mL) added drop wise over a period of 1 h maintaining the temperature at 30 °C and pH at 6.5 with 5N NaOH. While maintaining the pH at 6.5 and temperature at 30 °C, the stirring was continued for another 11 h when TLC of reaction showed absence of starting material. For TLC, an aliquot of 0.1 mL was withdrawn in an eppendorf tube and thoroughly

mixed with equal volume of ethyl acetate. The organic phase was separated by centrifugation and subjected to analysis by TLC. After completion of reaction, the product was extracted in ethyl acetate (3x25mL), washed once with brine (10 mL), dried over anhyd. sodium sulfate and solvents removed to leave a pale yellow residue, which was further purified by flash chromatography over silica gel (200-400 mesh) to obtain **4h** (2.53 g; Yield 94.6%). <sup>1</sup>H NMR (300 MHz, CDCl<sub>3</sub>): 1.52 (3H, t, *J* = 6.5 Hz, CH<sub>3</sub>); 2.50 (1H, bs, OH); 5.02 (1H, q, *J* = 6.5 Hz, CH); 7.54 and 8.12 (each 2H, each d, *J* = 8.9 Hz, aryl). <sup>13</sup>C NMR (75 MHz, CDCl<sub>3</sub>): 25.55, 69.55, 123.82, 126.22, 147.21, 153.26. Ee and absolute configuration (*R*) was determined based on comparison of optical rotation with literature. [ $\alpha$ ]<sub>D</sub><sup>25</sup> = +31.4 (c = 3.99, CHCl<sub>3</sub>) [lit.<sup>7</sup> (*S*)] [ $\alpha$ ]<sub>D</sub><sup>25</sup> = -30.5 (c = 4.0, CHCl<sub>3</sub>) 96% ee].

#### 4.5. List of primers.

| Entry | Oligomer | Sequence of the primer (5'→3')                |
|-------|----------|-----------------------------------------------|
| 1.    | crsF     | ATTATCC <u>CATATGG</u> CTAAGAAGCTTCTCCAACG    |
| 2.    | crsR     | ATCTTT <u>CTCGAG</u> GGGAAGCGTGTAGCCACC       |
| 3.    | ogF      | TTGTTGTT <u>CATATG</u> AAAGCTACTAAACTGGTACTG  |
| 4.    | ogR      | TTGTTGTT <u>CTCGAG</u> TTATCCGCGTCCTGCTTGG    |
| 5.    | oep-ogR  | CTTTATACATGCCTGGGATGCCGTTGTC                  |
| 6.    | oep-ogF  | CATCCCAGGCATGTATAAAGATTTAGAAGGG               |
| 7.    | gdhF     | TTGTTATT <u>CATATG</u> TATAAAGATTTAGAAGGGAAAG |
| 8.    | gdhR     | TTGTTGTT <u>CTCGAG</u> TCCGCGTCCTGCTTGAAT     |
| 9.    | oc1F     | TATCGCATT <u>CCATGG</u> GCAAAGCTACTAAACTGGTAC |
| 10.   | oc1R     | GTTATGTT <u>CAAGCT</u> TTTACGGCAGGGTATAACC    |
| 11.   | crsDF    | ATTATCC <u>CATGG</u> GCGCTAAGAAGCTTCTCCAACG   |
| 12.   | crsDR    | ATCTTT <u>AAGCT</u> TGGGAAGCGTGTAGCCACC       |

#### 4.6. Construction of plasmids

##### Construction of the 4.9 kb *pET 23(a)-omp-crs* (pET23(a)-GJSC) expression plasmid

The custom synthesized complete coding sequence for *omp-crs* (Sequence No. 7) in pUC 19 were double digested by *NdeI* and *EcoRI* and product was separated by agarose gel electrophoresis and 1.3 Kb *omp-crs* was purified from the gel with *Qiaquick kit* (Qiagen).

The 1.3 kb *omp-crs* gene was cloned downstream of the *lac* promoter of *NdeI*–*EcoRI* treated *pET 23(a)*, which was previously dephosphorylated by calf intestinal alkaline phosphatase. The 4.9 Kb plasmid *pET 23 (a)-omp-crs* was used to transform *E. coli* BL21(DE3) or *E. coli* C41(DE3).

#### **Construction of the 4.4 kb *pET 23(a)-crs* (pET23(a)-GJCC) expression plasmid**

The *crs* gene was amplified from the custom synthesized *omp-crs* in pUC 19 plasmid as a template by polymerase chain reaction (PCR) with the primers *crsF* and *crsR*. The PCR conditions were: initial denaturing at 95 °C for 5 min followed by 30 cycles of 95 °C for 60 s, 58 °C for 60 s and 72 °C for 60 s as well as a final extension step of 72 °C for 5 min. The PCR product (Sequence No. 8) was recovered by a QIAquick Gel extraction kit (Qiagen) and cloned into *pET 23(a)* through *NdeI* and *XhoI* site and the resultant 4.4 Kb *pET 23(a)-crs* plasmid was transformed into *E. coli* BL21(DE3) expressing *crs* with C-terminal His6 inside the cytoplasm.

#### **Construction of the 6.5 kb *pET 29(a)-omp-gdh* (pET29(a)-GJSG) expression plasmid**

The *omp-gdh* gene (Sequence No. 9) was constructed by applying the overlapping extension PCR strategy. Briefly, *omp* gene was amplified from the plasmid *pET 23 (a)-omp-crs* by polymerase chain reaction (PCR) with the primers *ogF* and *oep-ogR* and *gdh* gene was amplified from the plasmid *pET 29 (a)-gdh* by polymerase chain reaction (PCR) with the primers *oep-ogF* and *ogR*. Equimolar concentration of *omp* and *gdh* were used as a template for polymerase chain reaction (PCR) with the primers *ogF* and *ogR* for the fusion of *omp* with *gdh*. The PCR conditions were: initial denaturing at 95 °C for 5 min followed by 30 cycles of 95 °C for 60 s, 58 °C for 60 s and 72 °C for 90 s as well as a final extension step of 72 °C for 5 min. The 1.23 Kb PCR product was cloned into the pUC19 to get 3.9 Kb *pUC19-omp-gdh* plasmid. The 1.23 Kb *omp-gdh* fragment was amplified by using *ogF* and *ogR* primer and the resultant PCR product was recovered by a QIAquick Gel extraction kit (Qiagen) and cloned into *pET 29(a)* through *NdeI* and *XhoI* site and get the resultant 6.5 Kb *pET 29(a)-omp-gdh* plasmid was transformed into *E. coli* BL21(DE3) or *E. coli* C41(DE3).

#### **Construction of the 6.1 kb *pET 29(a)-gdh* (pET29(a)-GJCC) expression plasmid**

The *gdh* gene (Sequence No. 10) was amplified from the genomic DNA of the *Bacillus megaterium* as a template by polymerase chain reaction (PCR) with the primers *gdhF* and *gdhR*. The PCR conditions were: initial denaturing at 95 °C for 5 min followed by 30 cycles

of 95 °C for 60 s, 52 °C for 60 s and 72 °C for 60 s as well as a final extension step of 72 °C for 5 min. The PCR product was recovered by a QIAquick Gel extraction kit (Qiagen) and cloned into *pET 29(a)* through *NdeI* and *XhoI* site and the resultant 6.1 kb *pET 29(a)-gdh* plasmid was transformed into *E. coli* BL21(DE3).

### **Construction of the 7.8 kb *pETDuet1-omp-crs;omp-gdh* (pETDuet1-GJSCG) expression plasmid**

The *omp-crs* gene (Sequence No. 7) was amplified from the custom synthesized *omp-crs* in pUC 19 plasmid as a template by polymerase chain reaction (PCR) with the primers ocF and ocR. The PCR conditions were initial denaturing at 95 °C for 5 min followed by 30 cycles of 95 °C for 60 s, 58 °C for 60 s and 72 °C for 90 s as well as a final extension step of 72 °C for 5 min. The PCR product was recovered by a QIAquick Gel extraction kit (Qiagen) and cloned into *pETDuet1* through *NcoI* and *Hind3* site and got the resultant 6.65 kb *pETDuet1-omp-crs* plasmid. The further extension of the *omp-gdh* gene in 6.65 kb *pETDuet1-omp-crs* plasmid was done by amplification of the 1.2 kb *omp-gdh* gene (Sequence No. 9) from the *pET 29(a)-omp-gdh* plasmid as a template by polymerase chain reaction (PCR) with the primers ogF and ogR. The PCR conditions were: initial denaturing at 95 °C for 5 min followed by 30 cycles of 95 °C for 60 s, 54 °C for 60 s and 72 °C for 90 s as well as a final extension step of 72 °C for 5 min. The PCR product was recovered by a QIAquick Gel extraction kit (Qiagen) and cloned into *pETDuet1-omp-crs* plasmid through *NdeI* and *XhoI* site and the resultant 7.8 kb *pETDuet1-omp-crs;omp-gdh* plasmid was transformed into the *E. coli* BL21(DE3) or *E. coli* C41(DE3).

### **Construction of the 7.0 kb *pETDuet1-crs;gdh* (pETDuet1-GJCCG) expression plasmid**

The *crs* gene (Sequence No. 8) was amplified from the custom synthesized *omp-crs* in pUC 19 plasmid as a template by polymerase chain reaction (PCR) with the primers crsDF and crsDR. The PCR conditions were initial denaturing at 95°C for 5 min followed by 30 cycles of 95 °C for 60 s, 58 °C for 60 s and 72 °C for 60 s as well as a final extension step of 72 °C for 5 min. The PCR product was recovered by a QIAquick Gel extraction kit (Qiagen) and cloned into *pETDuet1* through *NcoI* and *Hind3* site and got the resultant 6.2 kb *pETDuet1-omp-crs* plasmid. The further extension of the *gdh* gene in 6.2 kb *pETDuet1-crs* plasmid was done by amplification of the 0.75 kb *gdh* gene (Sequence No. 10) from the *pET 29(a)-omp-gdh* plasmid as a template by polymerase chain reaction (PCR) with the primers ogF and ogR. The PCR conditions were: initial denaturing at 95 °C for 5 min followed by 30 cycles of

95 °C for 60 s, 54 °C for 60 s and 72 °C for 90 s as well as a final extension step of 72 °C for 5 min. The PCR product was recovered by a QIAquick Gel extraction kit (Qiagen) and cloned into *pETDuet1-crs* plasmid through *NdeI* and *XhoI* site and the resultant 7.0 kb *pETDuet1-crs;gdh* plasmid was transformed into the *E. coli* BL21(DE3) or *E. coli* C41(DE3).

#### **4.7. Expression of the recombinant protein in *E. coli* strain**

Fresh culture of recombinant *E. coli* strain harboring plasmid was grown in 20 mL LB media containing either ampicillin (100 µg/mL) or kanamycin (50 µg/mL) or both at 37 °C. After 6 h 5 mL of the culture was inoculated in 500 mL fresh LB media containing antibiotic depending upon the plasmid and grown at 37 °C under 200 rpm shaking condition. When the OD at 600 nm reached 0.4-0.6, the culture was induced with final concentration of 0.2 mM IPTG and the culture incubated further for 16 h at 20 °C under 200 rpm shaking condition. The cells were isolated by centrifugation, washed twice with 50 mM phosphate buffer, pH 6.5 and used for future experiments. Expression of the protein were checked by SDS-PAGE, which was carried out according to protocol of Laemmli with some modifications.<sup>13</sup>

#### **4.8. Demonstration of cell surface display of *crs* and *gdh***

Induced cells from 100 mL culture were centrifuged and washed with 50 mM phosphate buffer, and then suspended in 5 mL lysis buffer (50 mM NaH<sub>2</sub>PO<sub>4</sub>, 150 mM NaCl, 1 mg/mL Lysozyme, pH-8.0), at 4 °C for 30 min, and then sonicated for 20 min with 30 sec pulse on and 30 sec pulse off. The cell debris was removed by centrifugation at 14000 rpm for 30 min. The membrane was separated at 100000g for 2 h and washed with the same buffer and then suspended in 1 mL membrane solubilization buffer (25 mM Tris HCl, 20% Glycerol and 2% Triton X100, pH-7.5) and the activity for *gdh* and *crs* was determined by as described below.

#### **4.9. Immuno-localization of carbonyl reductase in *E. coli* BL21(DE3)**

##### **4.9.1. anti-*crs* polyclonal antibody**

350 µg of purified *crs* in 400 µL of buffer was emulsified with equal amount of adjuvants and injected to rabbits. First injection was given with Freund's complete adjuvant, while 4 booster doses of 350 µg of purified *crs* in 400 µL of buffer, emulsified with equal amounts of Freund's incomplete adjuvant, given continuously at the interval of 21 days. Samples of serum were withdrawn on fifth day after each booster to check antibody titer. Sample collected after 5 days of the 4<sup>th</sup> booster was used for the further experiment. Pre-immune sera was collected as a control before the first immunization to check the cross-reactivity if any.

#### **4.9.2. Western blotting**

The antibodies raised in rabbit were tested for their specificity against the enzyme by western blotting. 12.5% SDS-PAGE was run and the protein was transferred to PVDF membrane by applying a current of 100 mA for 1h. The membrane was temporarily stained with Ponceau S stain to check the transfer. It was kept for blocking with 10% skimmed milk in phosphate buffer saline for 2h at RT. This was then washed thrice with 0.05% Tween 20 in 1X PBS for 5 min and once with PBS alone for 10 min. The strips were cut for each lane to be incubated with different dilution of the antibody. Different dilutions of primary antibodies were made in 0.1% skimmed milk in 1X PBS. The antibodies from pre-immunized sera were used as control in this case to check the cross-reactivity of protein. The antibody dilution 1/1,00,000 gave a good signal. After incubating with primary antibody for 2 h at room temperature, this was washed thrice with 0.05% Tween 20 in 1X PBS for 5 min and once with PBS alone for 10 min. It was next incubated with alkaline phosphatase conjugated goat anti-rabbit antibody for 1 h. Washing was done after each incubation as previously described. The strips were then dipped in the substrate solution contains 5-bromo-4-chloro-3-indolyl phosphate (BCIP, 0.15 mg/mL), nitro blue tetrazolium (NBT, 0.30 mg/mL), Tris HCl (100 mM) and MgCl<sub>2</sub> (5 mM), pH 9.5 for 10 min.<sup>1, 2</sup> The blot was analyzed by Scion Image software for comparative study of the protein.

#### **4.9.3. Transmission electron microscopy**

Cells were harvested by centrifugation at 5,000 x g at 4 °C and washed 4 times with Dulbecco's phosphate-buffered saline (PBS), re-suspended and kept at 4 °C in 0.5% paraformaldehyde and 0.5% glutaraldehyde for 30 min. These were washed with PBS and a suspension was made in 2% agarose solution. The agarose blocks were cut into small pieces and were dehydrated with graded series of ethanol and embedded in LR White resin (polymerization at 60 °C for 48-74 h). Ultrathin sections cut with a Reichert Ultracut Ultramicrotome (Leica Reichart Jung, Austria) were picked up on 200-mesh nickel grids. Nonspecific sites were blocked with 0.1M PBS with 3% fish gelatin and 0.25% Tween 20 for 2 h at room temp (blocking buffer). The grids carrying the ultrathin Sections were then washed in 0.05% Tween 20 in PBS (washing buffer) and incubated overnight with rabbit anti-*crs* polyclonal antibody (diluted 1:2000 in 1:10 diluted blocking buffer) at 4 °C. The grids were washed in washing buffer and incubated for 2 h at room temp with goat anti-rabbit antibody conjugated to 10 nm gold spheres (diluted 1:200 in 1:100 diluted blocking

buffer). This was followed by washing the grids in washing buffer and subsequently in 0.1M phosphate buffer. The sections were then fixed with 1% glutaraldehyde in phosphate buffer for 15 min, and then washed in milliQ water; these were then stained in 2% aqueous uranyl acetate for 30 min at room temperature in dark followed by final washing with milliQ water. The grids thus prepared were examined in a Philips CM-10 transmission electron microscope (TEM, operating voltage 60-80kV), and random fields were photographed. The prints of the micrographs were then made at the desired magnification for further analysis. Controls included the labeling of each set of samples with pre-immune serum (i.e. normal rabbit serum) instead of anti-*crs* serum and cells which does not expressing *crs*, treated with rabbit anti-*crs* polyclonal antibody.

## 5. Plasmid maps

### 1- Pet23(a)-GJSC

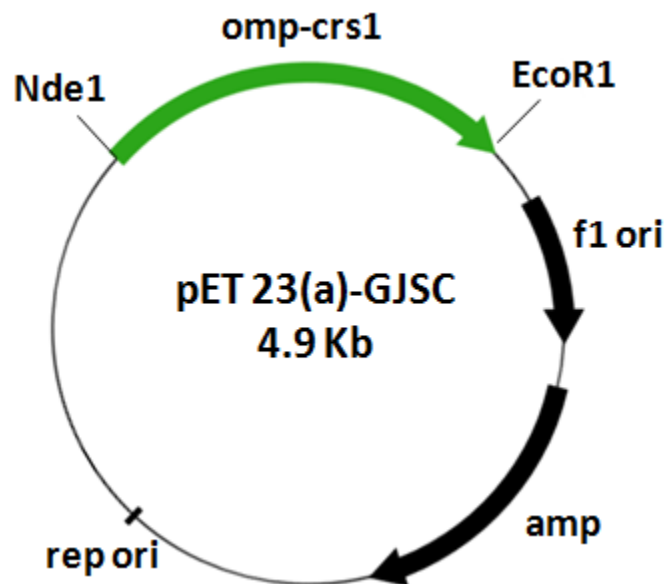

2- Pet29(a)-GJSG

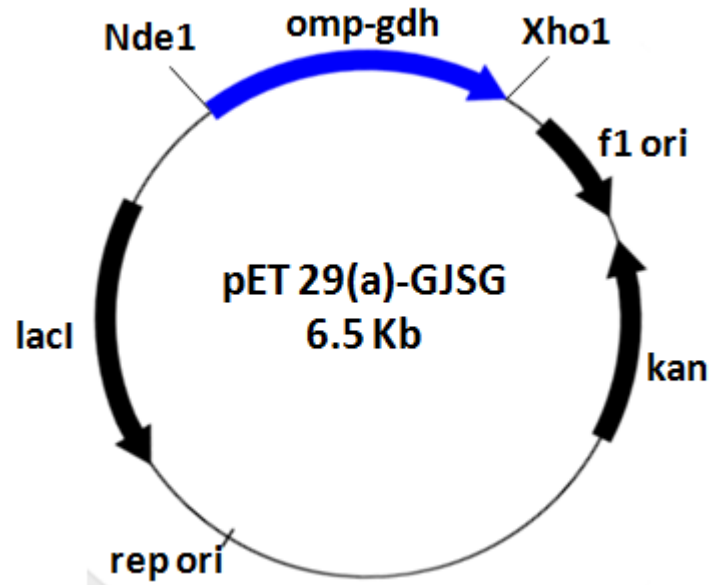

3- Pet23(a)-GJCC

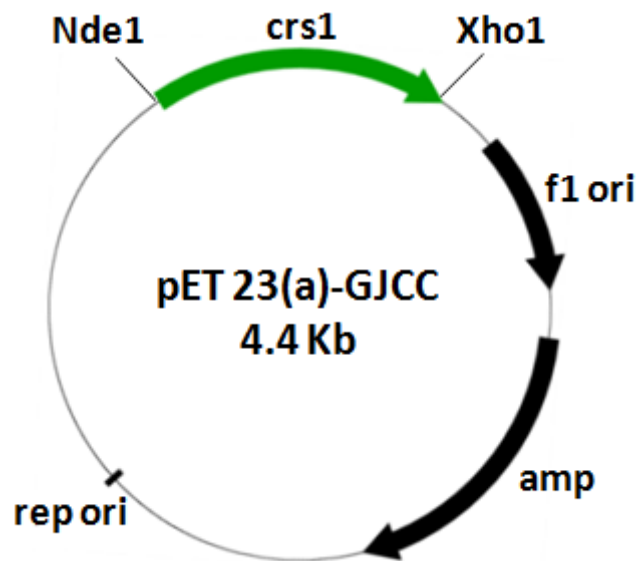



4- Pet23(a)-GJCG

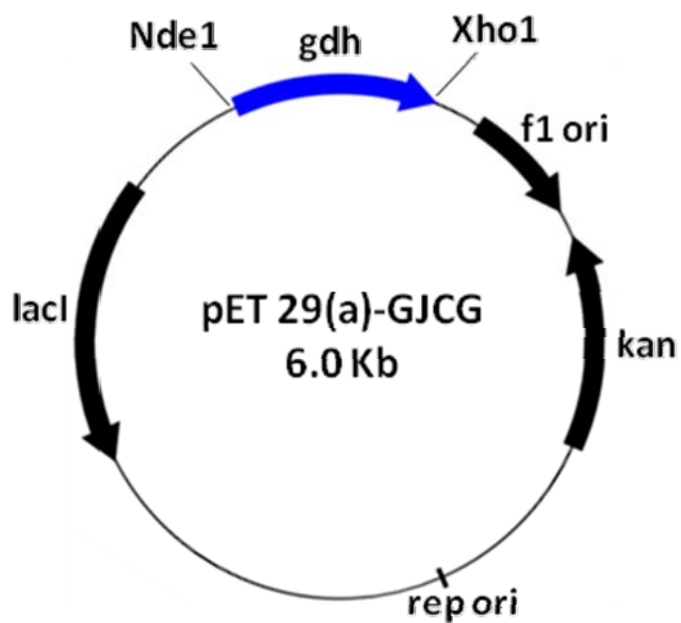

6. HPLC/GLC traces

| Entry | Product                                      | HPLC/GLC conditions<br>(column, detection wavelength, mobile phase, flow rate)<br>Injection: manual | <i>rac</i> -alcohol | Biocatalyzed alcohol |
|-------|----------------------------------------------|-----------------------------------------------------------------------------------------------------|---------------------|----------------------|
| 1     | <p style="text-align: center;"><b>2a</b></p> | Chiralcel OB-H, $\lambda_{217}$ ,<br>hexane:isopropanol<br>96:4, 1 ml/min                           |                     |                      |

|   |                                                                                                      |                                                                                                                                                                |                                                                                      |                                                                                       |
|---|------------------------------------------------------------------------------------------------------|----------------------------------------------------------------------------------------------------------------------------------------------------------------|--------------------------------------------------------------------------------------|---------------------------------------------------------------------------------------|
| 2 | 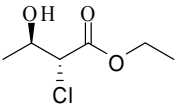 <p><b>2b</b></p>   | <p><b>GLC for d.e.</b><br/>determination</p> <p>Factorfour™ (Varian,<br/>30m x 0.25mm, 140 °C,<br/>N<sub>2</sub> 1 kg min<sup>-1</sup>, detection<br/>FID)</p> |    |    |
|   |                                                                                                      | <p><b>GLC for e.e.</b></p> <p>betaDex™ (Supelco,<br/>30m x 0.25mm, 140 °C,<br/>N<sub>2</sub> 1 kg min<sup>-1</sup>, detection<br/>FID)</p>                     |    |    |
| 3 |  <p><b>2c</b></p>  | <p>OB-H, λ<sub>217</sub>,<br/>hexane:isopropanol<br/>96:4, 1 ml/min</p>                                                                                        |   |   |
| 4 |  <p><b>2d</b></p> | <p>Chiralcel OD-H, λ<sub>217</sub>,<br/>hexane:isopropanol<br/>95:5, 1 ml/min</p>                                                                              |  |  |
| 5 |  <p><b>2e</b></p> | <p>Chiralcel OB-H, λ<sub>217</sub>,<br/>hexane:isopropanol<br/>96:4, 1 ml/min</p>                                                                              |  |  |

|    |                                                                                                      |                                                                      |                                                                                      |                                                                                                                                                     |
|----|------------------------------------------------------------------------------------------------------|----------------------------------------------------------------------|--------------------------------------------------------------------------------------|-----------------------------------------------------------------------------------------------------------------------------------------------------|
| 6  | 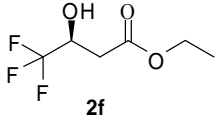 <p><b>2f</b></p>   | OB-H, OD-H and OJ column                                             | Failed to resolve                                                                    | $[\alpha]_D^{25} = -20.3$ ( $c = 1.87$ , $\text{CHCl}_3$ )<br>[lit. <sup>10</sup> $[\alpha]_D^{23} = -12.1$ ( $c = 1$ , $\text{CHCl}_3$ ) 64.5% ee] |
| 7  |  <p><b>2g</b></p>   | Chiralcel OB-H, $\lambda_{217}$ , hexane:isopropanol 96:4, 1 ml/min. |    |                                                                  |
| 8  |  <p><b>2h</b></p>   | Chiralcel OB-H, $\lambda_{217}$ , hexane:isopropanol 96:4, 1 ml/min  |   |                                                                 |
| 9  |  <p><b>2i</b></p> | Chiralcel OB-H, $\lambda_{217}$ , hexane:isopropanol 96:4, 1 ml/min  |  |                                                                |
| 10 |  <p><b>2j</b></p> | Chiralcel OB-H, $\lambda_{217}$ , hexane:isopropanol 96:4, 1 ml/min  |  |                                                                |

|    |                                                                                                     |                                                                           |                                                                                    |                                                                                                                                                           |
|----|-----------------------------------------------------------------------------------------------------|---------------------------------------------------------------------------|------------------------------------------------------------------------------------|-----------------------------------------------------------------------------------------------------------------------------------------------------------|
| 12 | 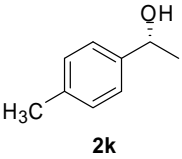 <p><b>2k</b></p>  | Chiralcel OB-H, $\lambda_{217}$ ,<br>hexane:isopropanol<br>95:5, 1 ml/min |  |                                                                        |
| 13 |  <p><b>2l</b></p>  | OB-H, OD-H and OJ<br>column                                               | Failed to resolve                                                                  | $[\alpha]_D^{22} = +51.4$ (c 1.72,<br>CHCl <sub>3</sub> )<br>[lit. <sup>12</sup> (S)] $[\alpha]_D^{25} = -51.9$ (c<br>0.72, CHCl <sub>3</sub> ) 99% ee)   |
| 11 |  <p><b>2m</b></p>  | OB-H, OD-H and OJ<br>column                                               | Failed to resolve                                                                  | $[\alpha]_D^{25} = +27.2$ (c 2.08,<br>MeOH)<br>[lit. <sup>12</sup> (S)] $[\alpha]_D^{22} = -28.1$ (c<br>1.13%, MeOH) 99% ee]                              |
| 14 |  <p><b>2n</b></p> | OB-H, OD-H and OJ<br>column                                               | Failed to resolve                                                                  | $[\alpha]_D^{25} = +31.4$ (c = 3.99,<br>CHCl <sub>3</sub> )<br>[lit. <sup>7</sup> (S)] $[\alpha]_D^{25} = -30.5$ (c =<br>4.0, CHCl <sub>3</sub> ) 96% ee] |

## 7. NMR SPECTRA

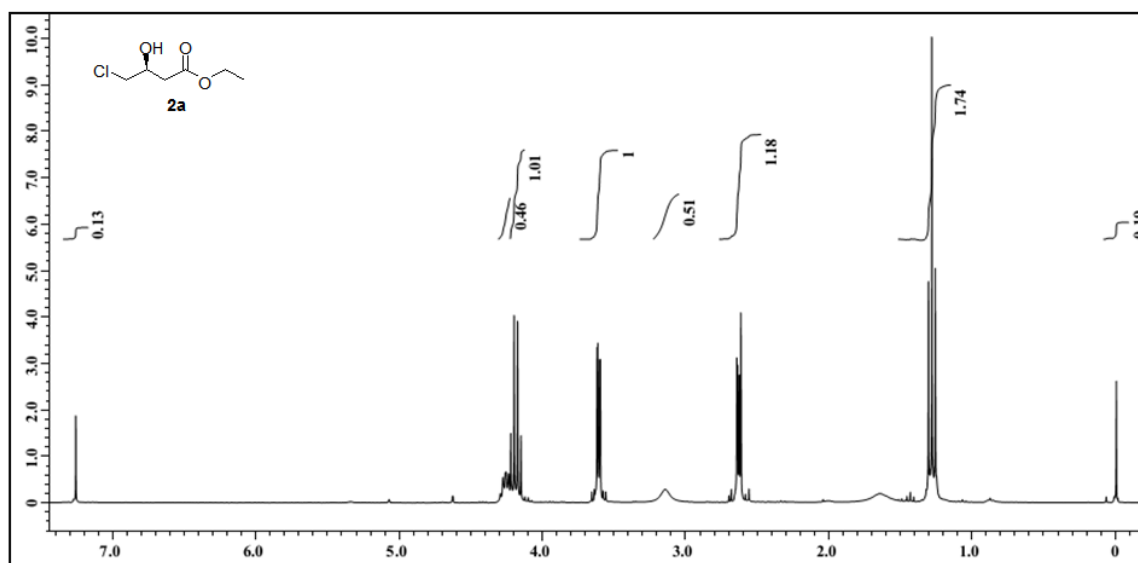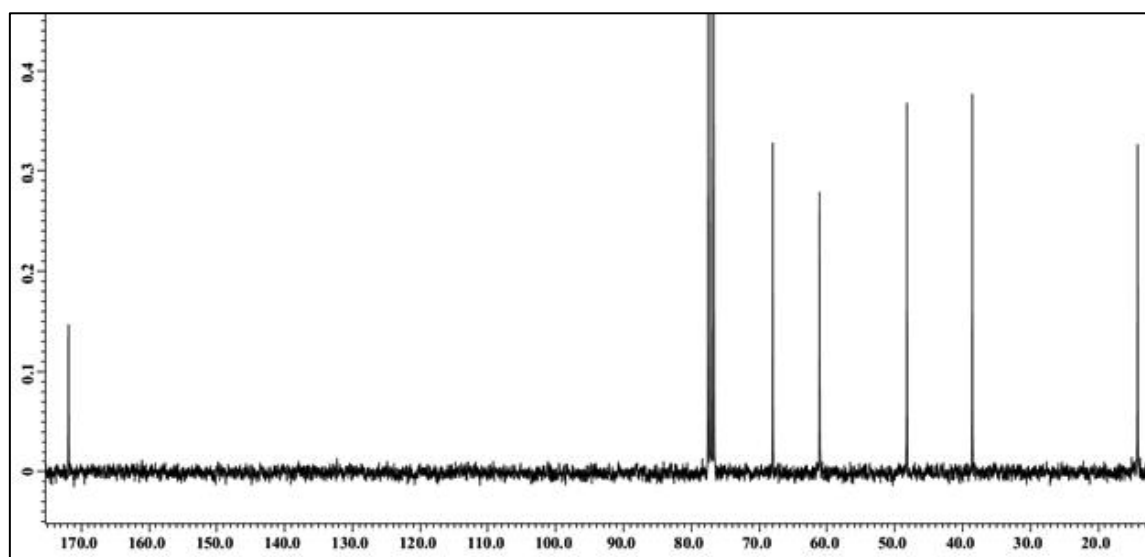

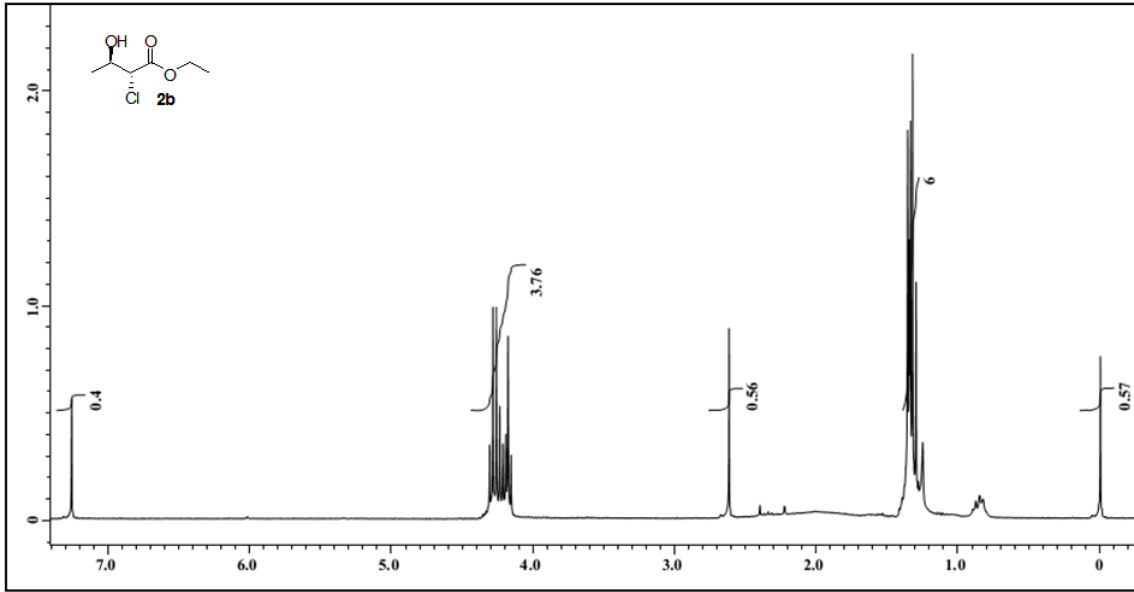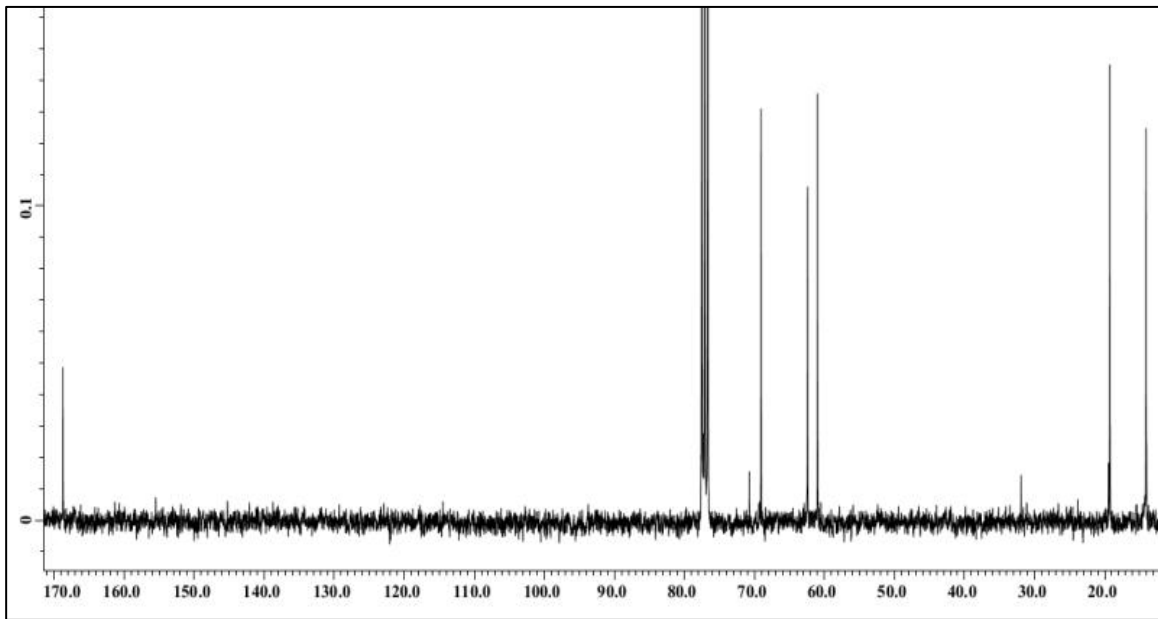

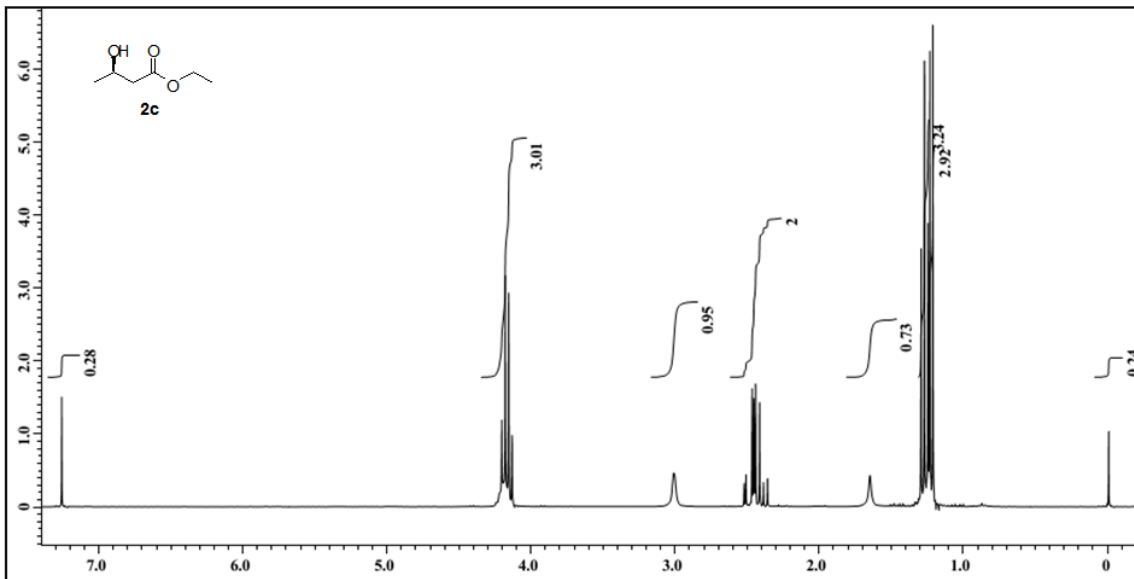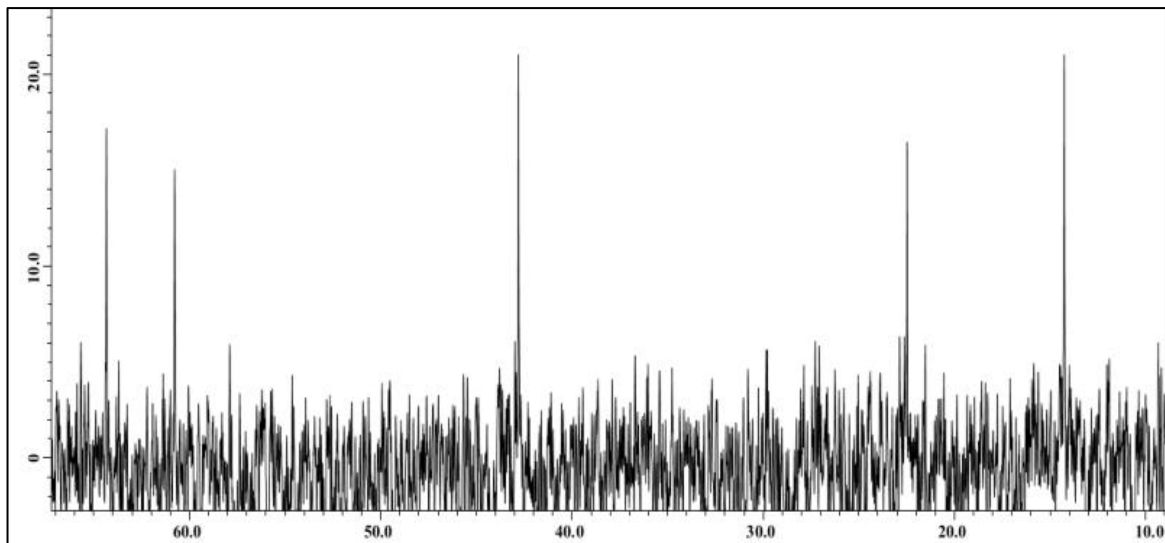

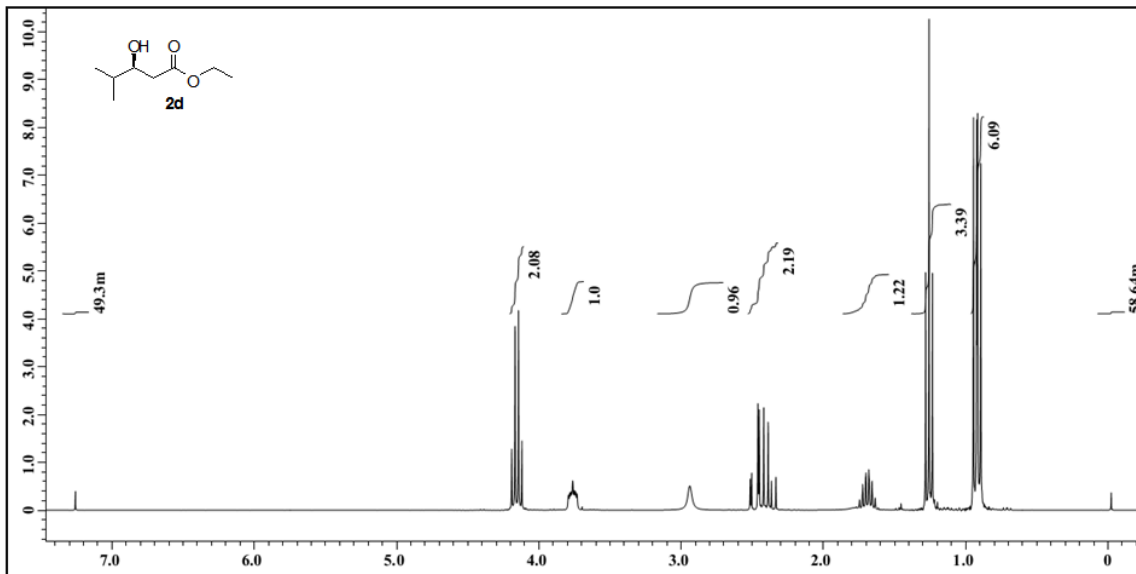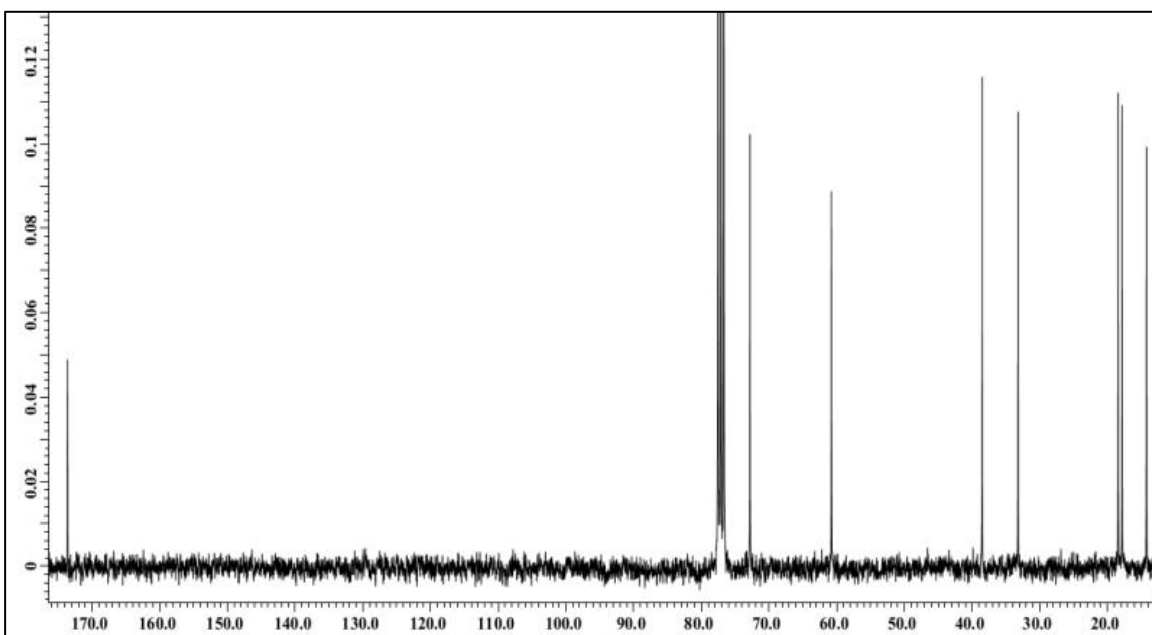



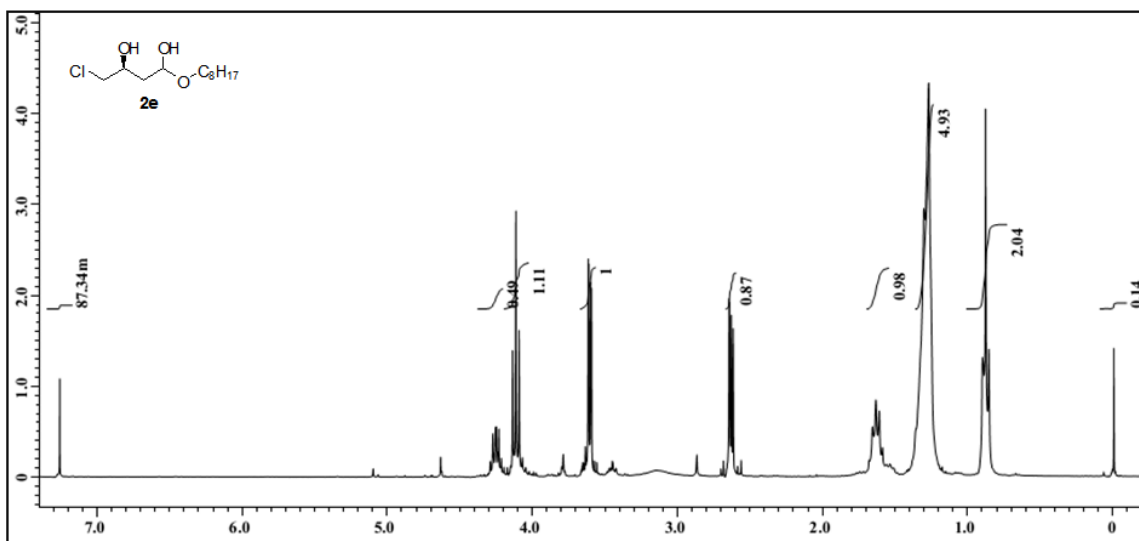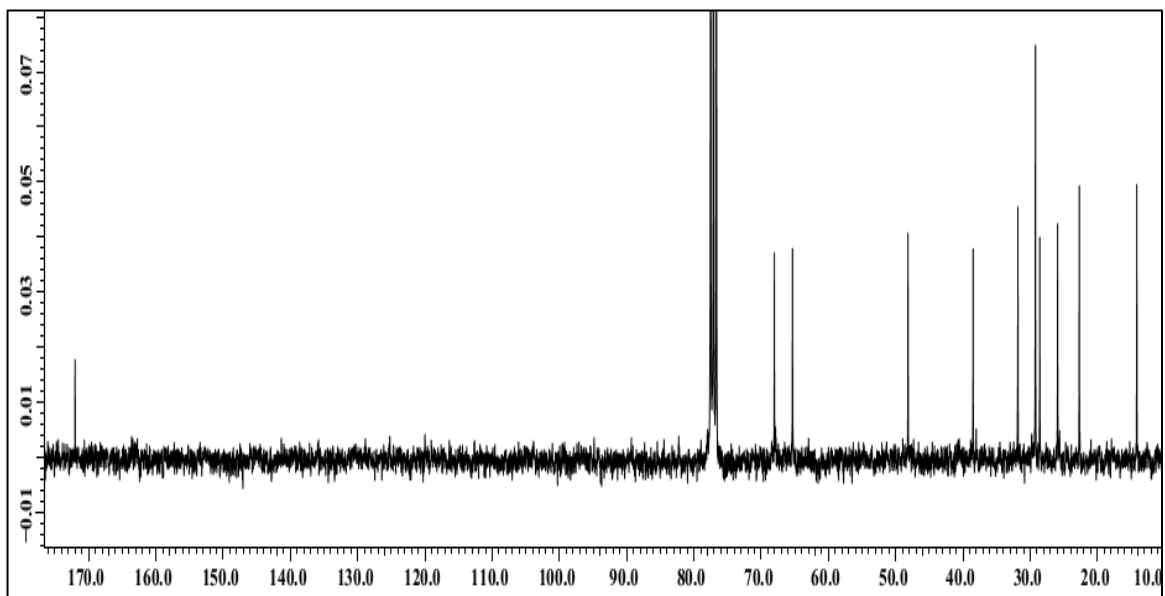

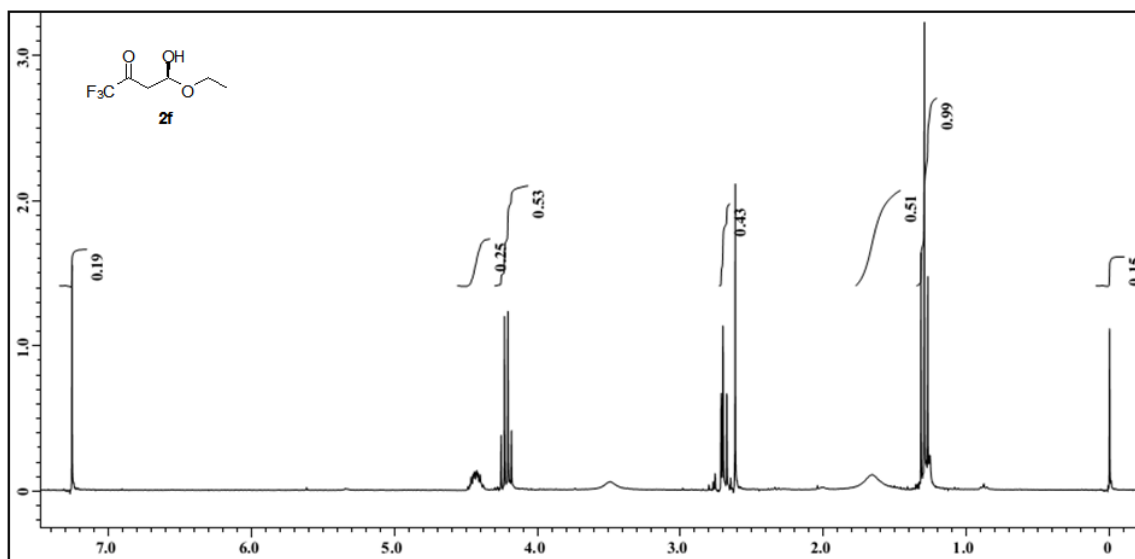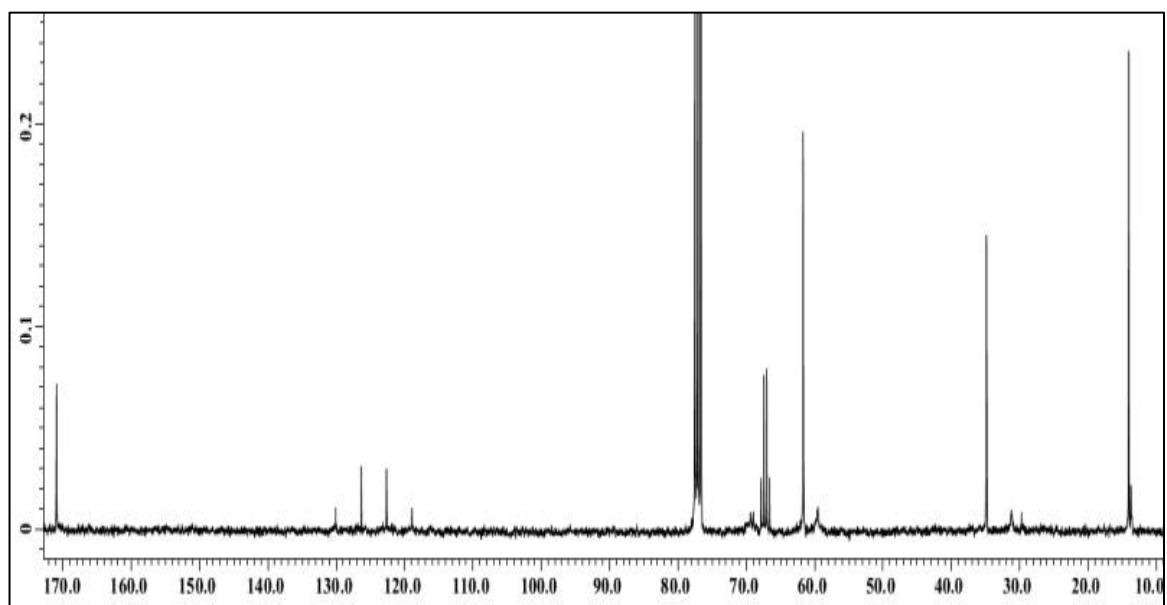

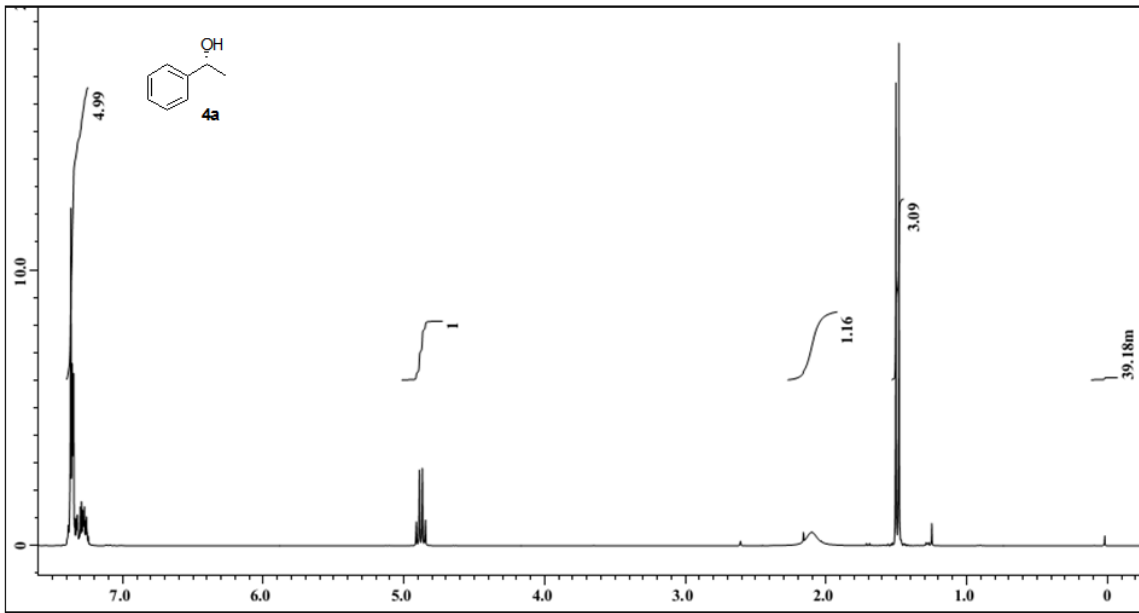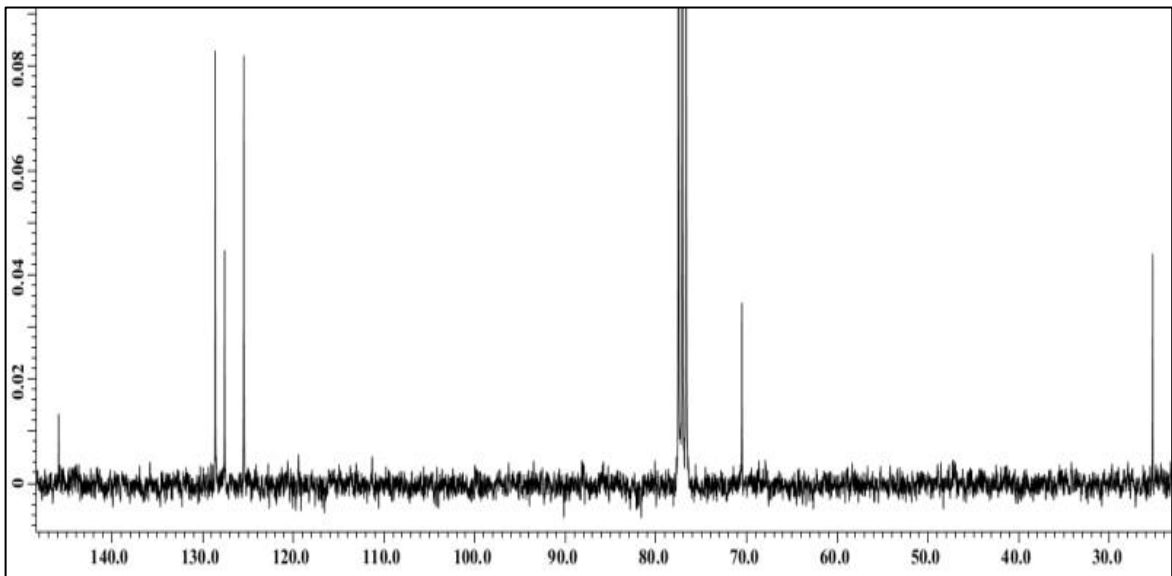

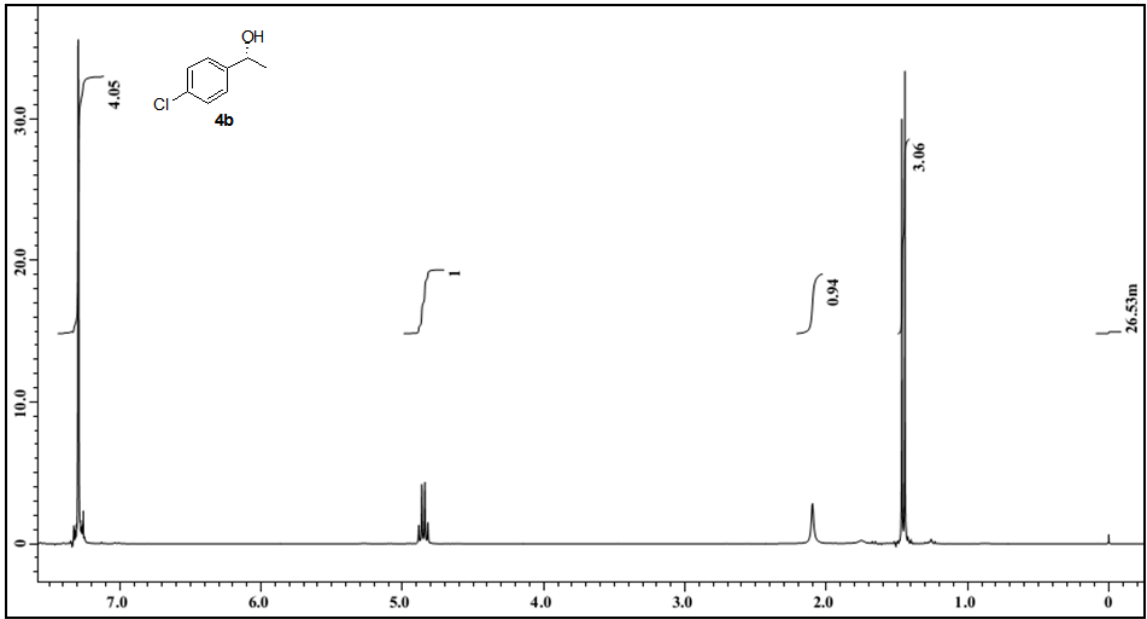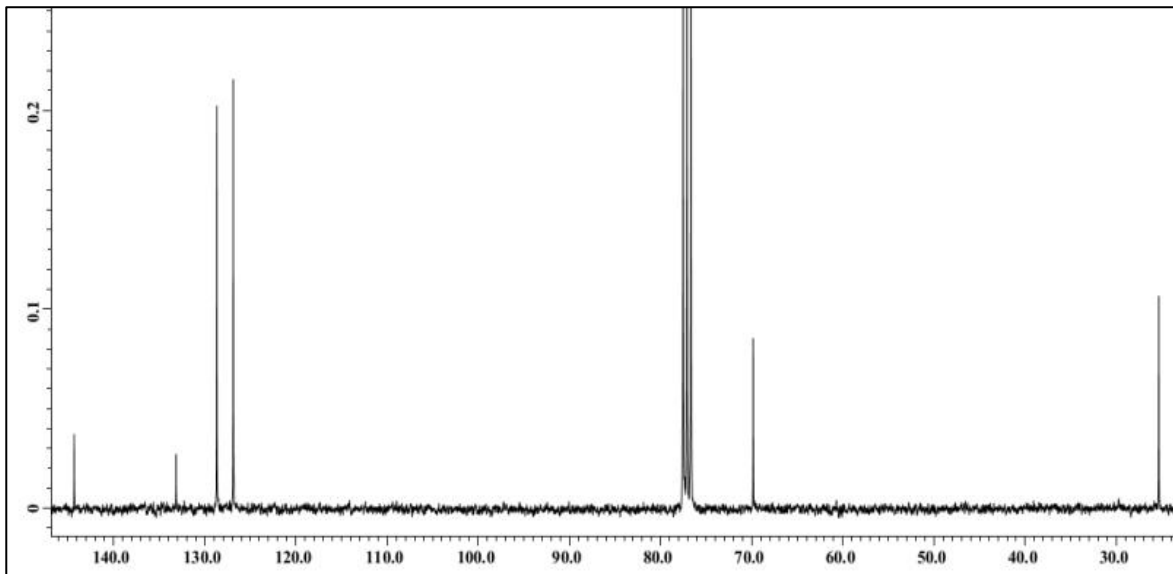

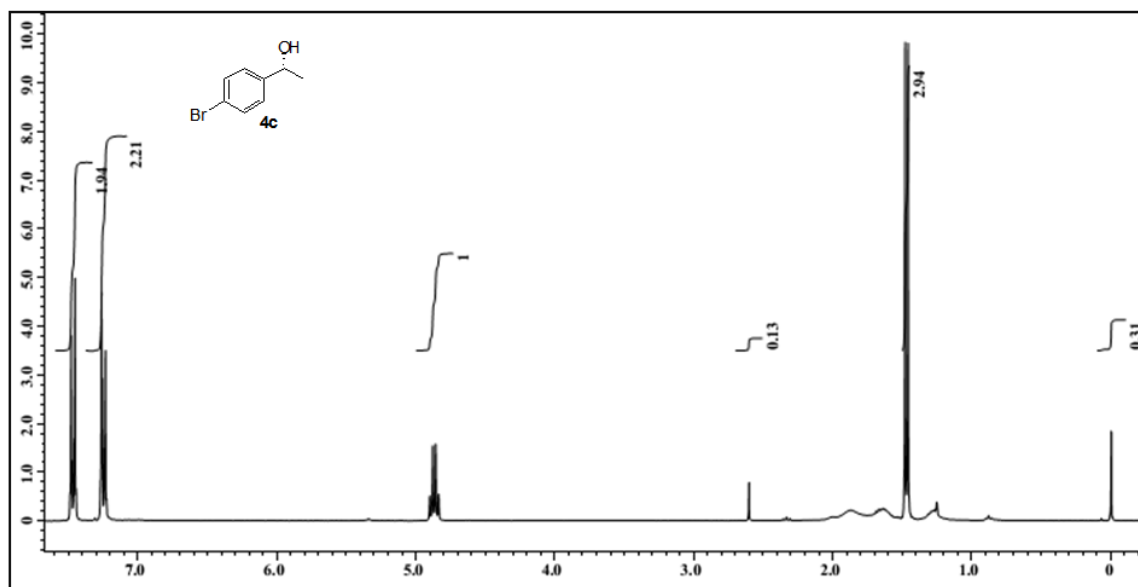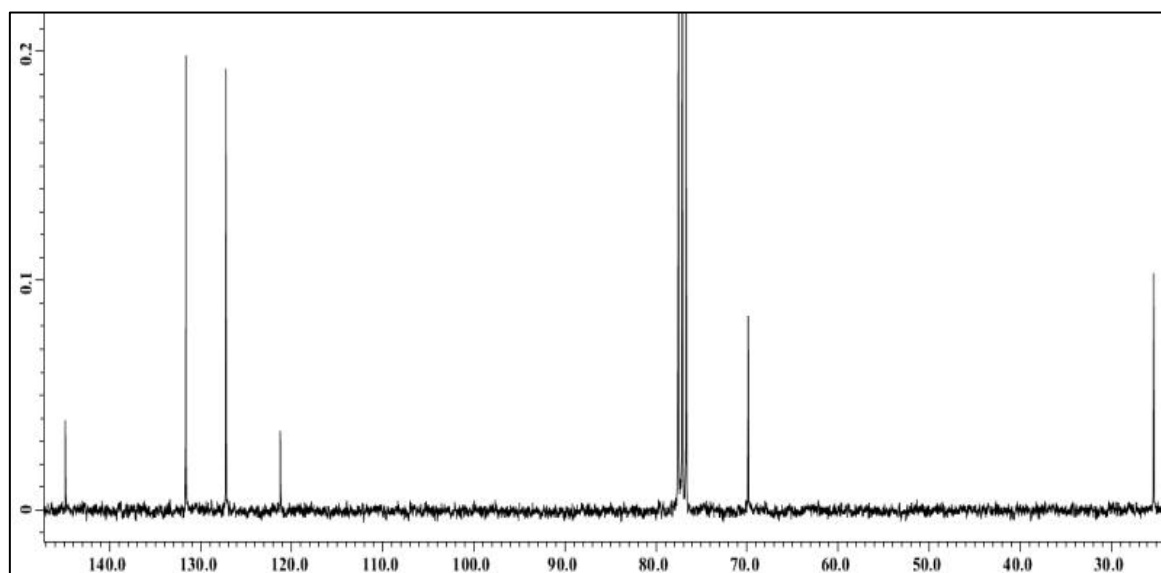

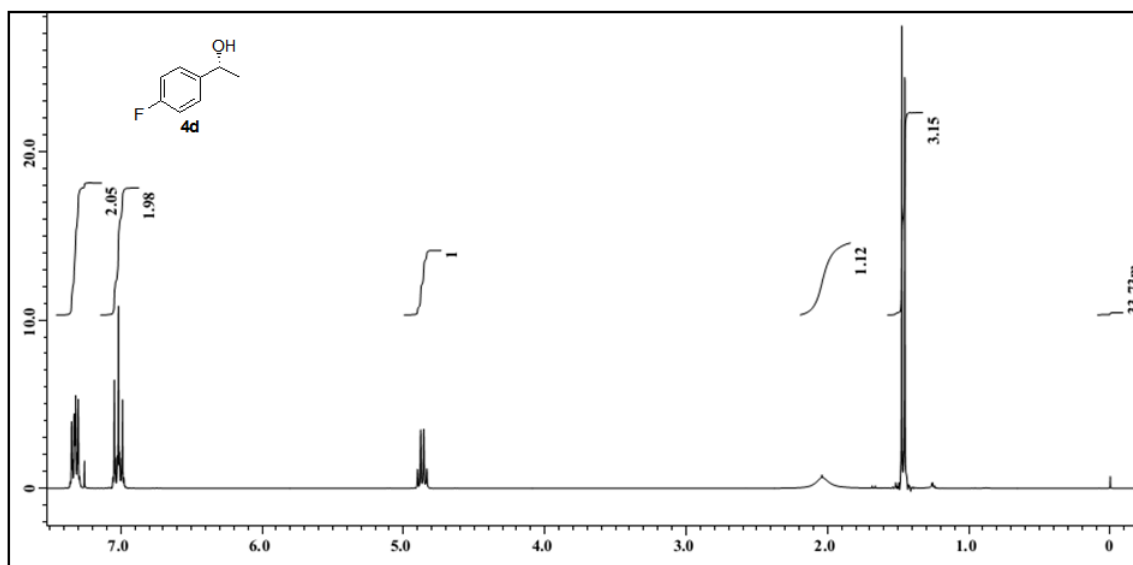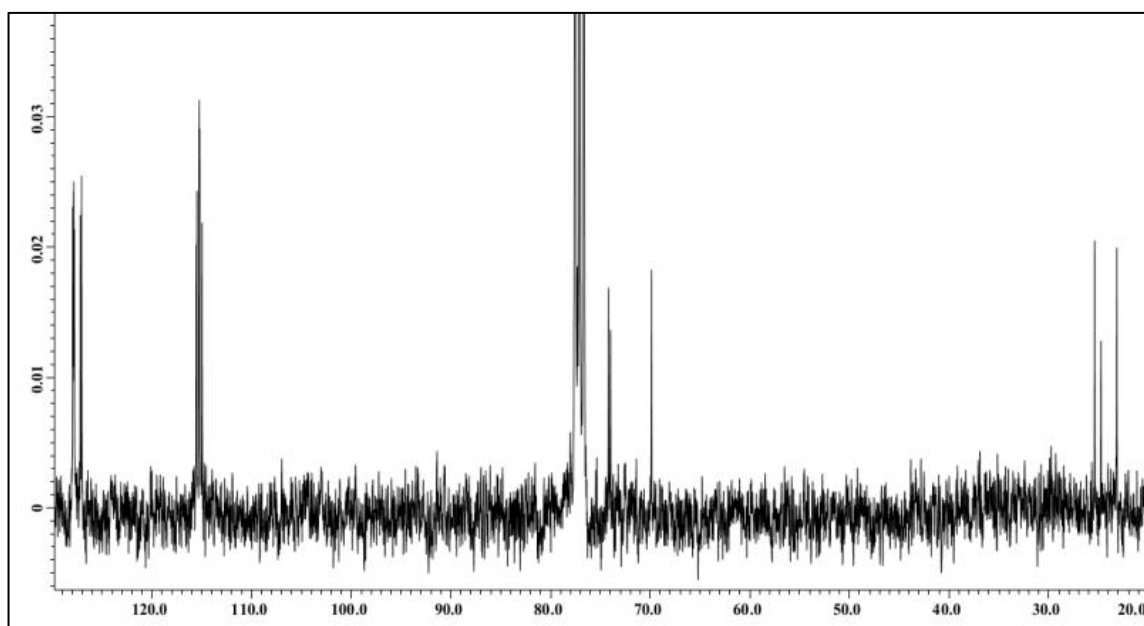

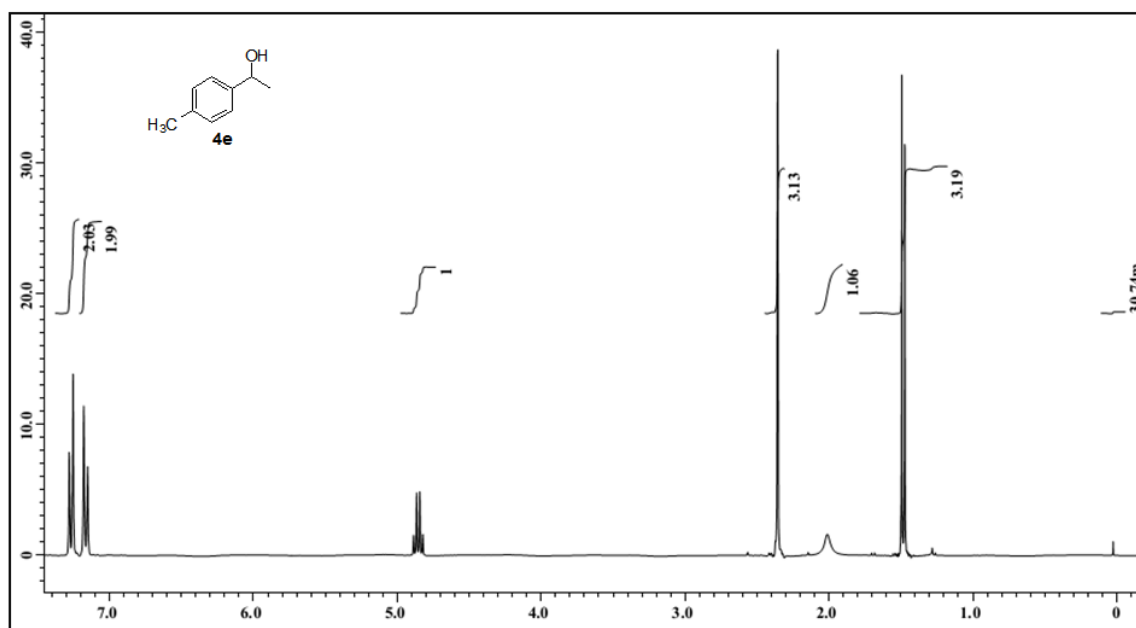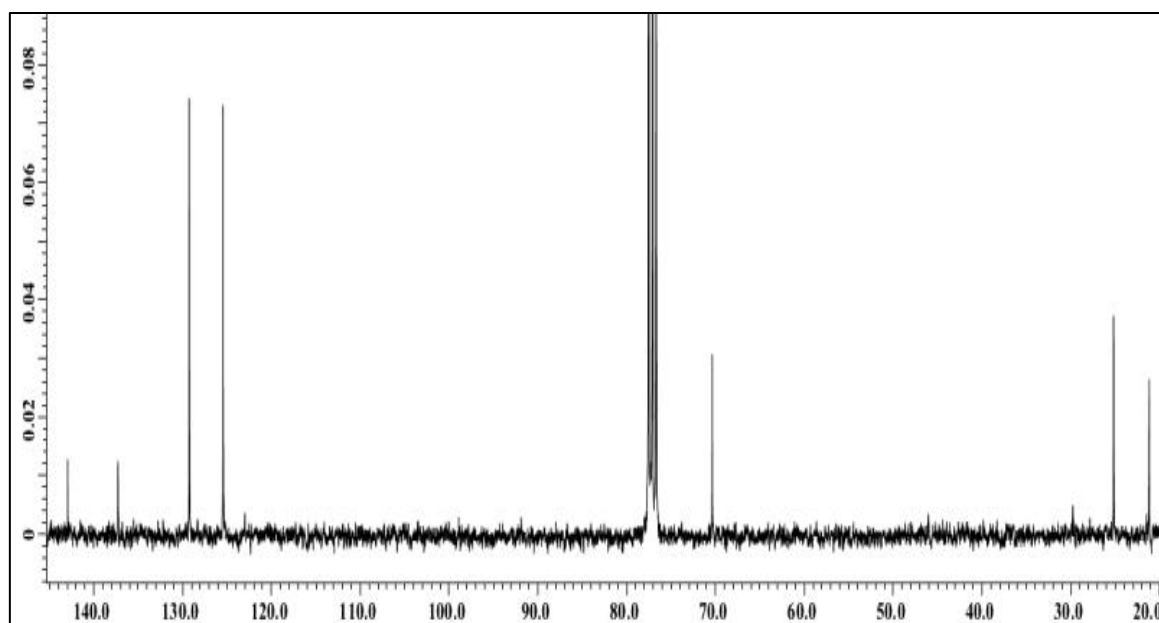

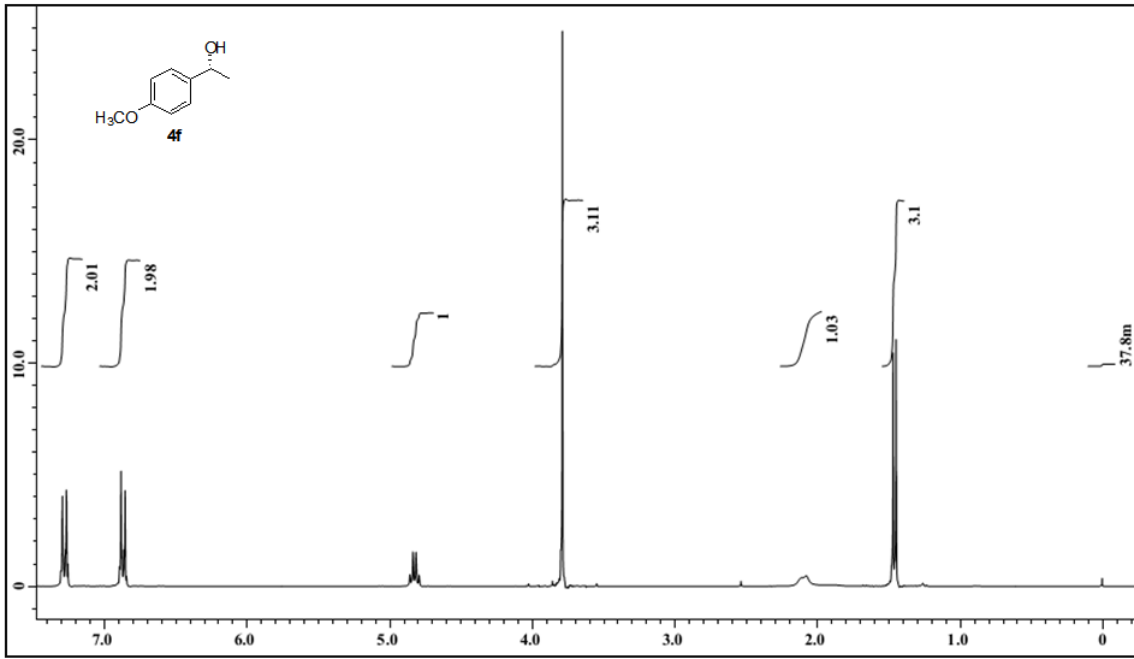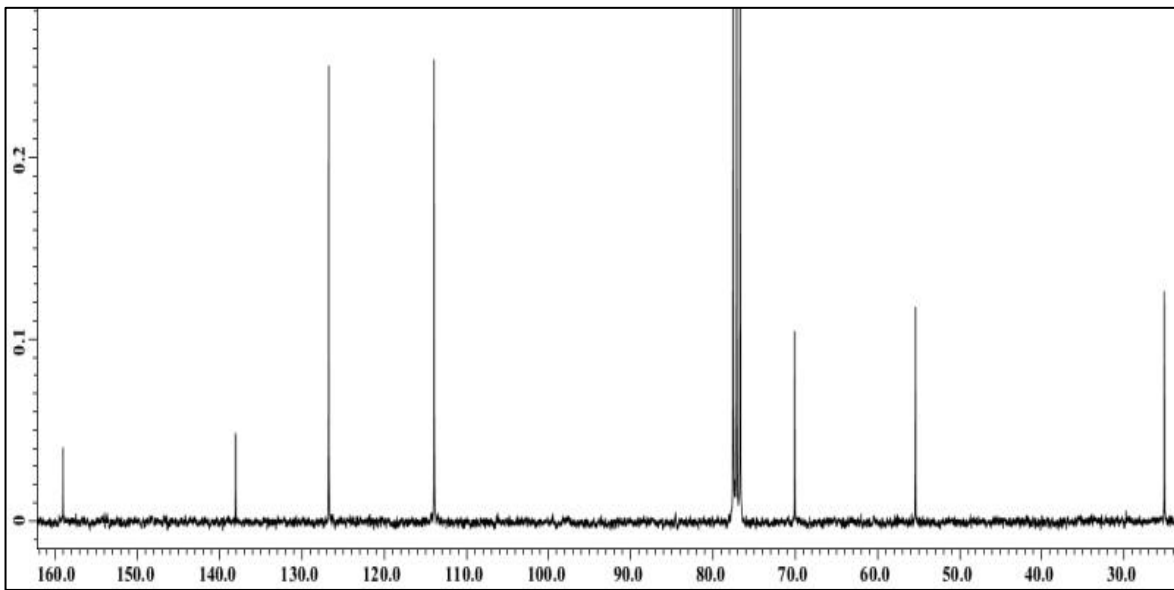



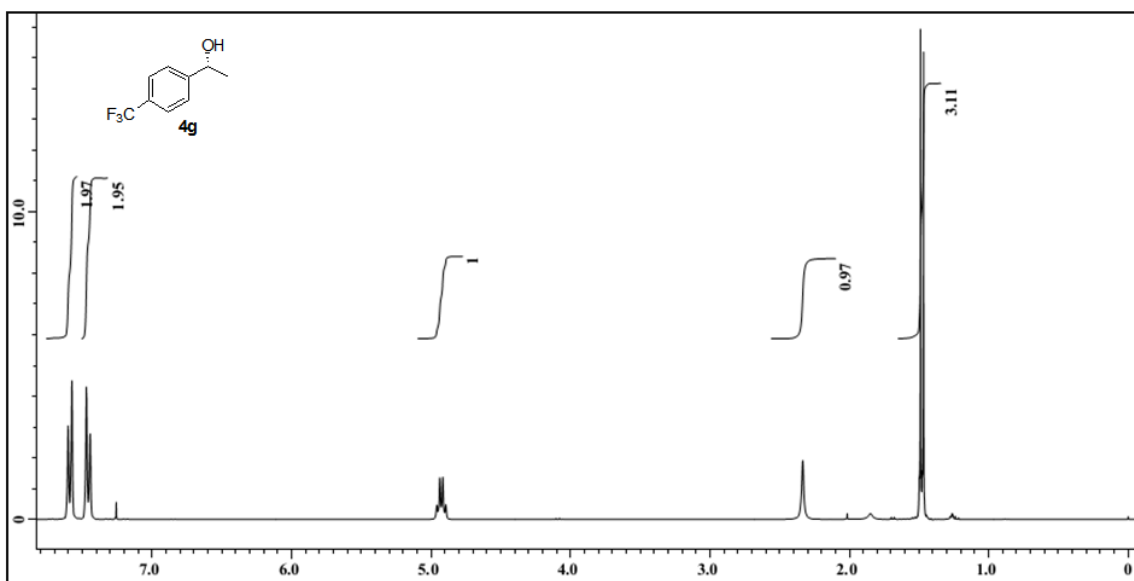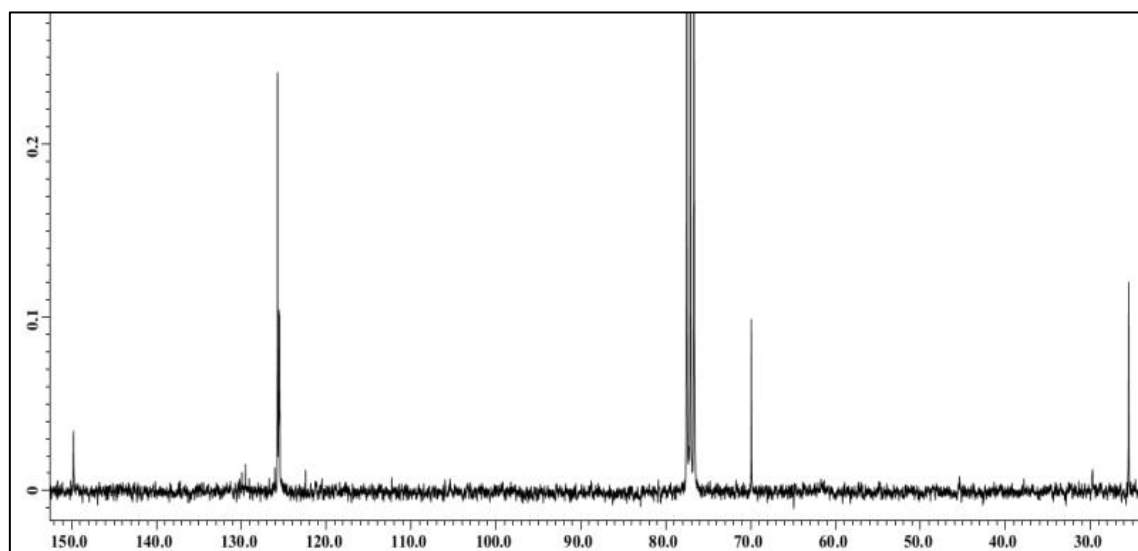

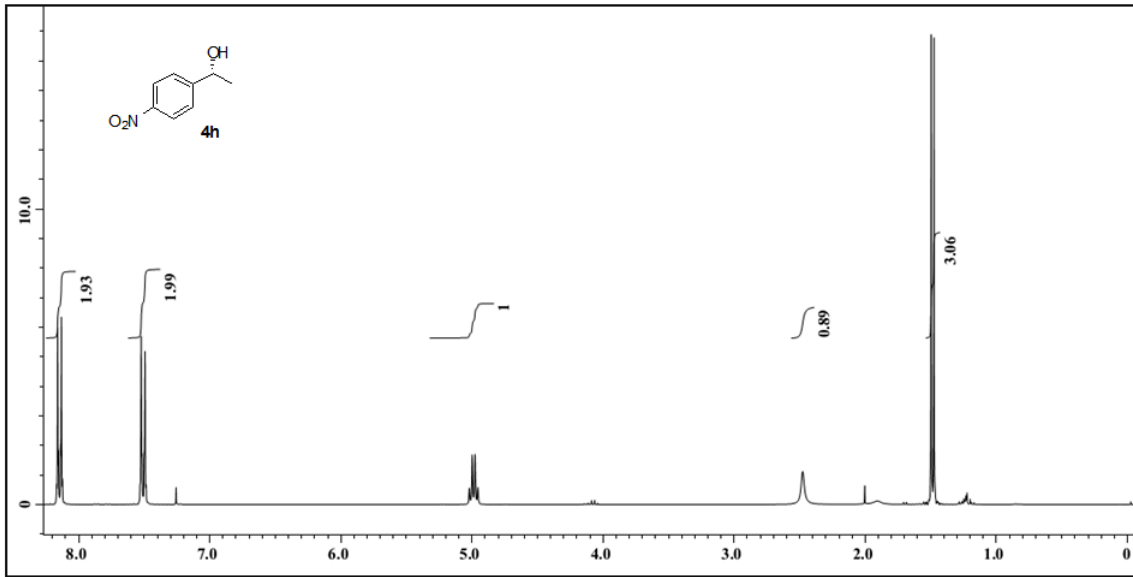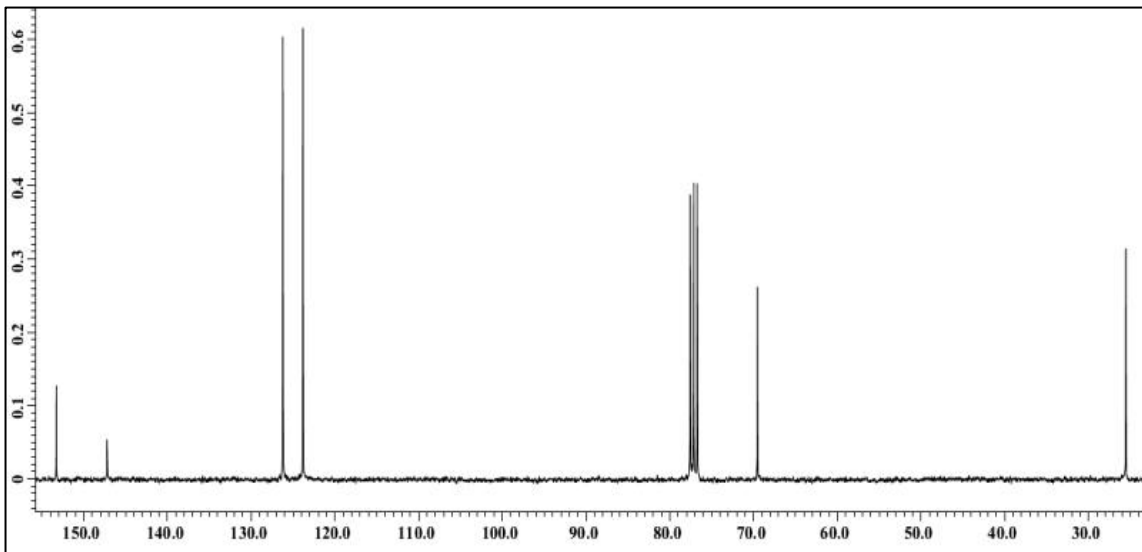

## 8. Gene sequence listing

<210> 1  
<211> 6965  
<213> pETDuet1-crs,gdh (pETDuet1-GJCCG)

**Plasmid pETDuet1-GJCCG coexpresses carbonyl reductase and glucose dehydrogenase in the cytoplasm of *E. coli* strain**

```
ggggaattgt gagcggataa caattcccct ctagaaataa ttttgtttaa cttaagaag      60
gagatatacc atgggcatgg cgaaaaactt ctctaattgtg gaatatccag caccggcgcc      120
ggcacacacc aaagacgaaa gcctgcaagt gctggatctg tttaaactga atggcaaagt      180
tgcgtctatc acgggtagca atagtgggat cggttatgcg ctggccgaag cattcgctca      240
agttggcgct gacgtcgcga tttggtacaa cagccacgat gcgaccggca aagcggaagc      300
gctggcgaaa aaatatggtg ttaaagtcaa agcctacaaa gcaaatgtct cctcatcgga      360
tgccgtgaaa cagaccattg aacagcaaat caaagacttt ggccatctgg atattgtggt      420
tgctaacgcg ggcattcccgt ggacgaaggg tgcgtatatt gaccaggatg acgataaaca      480
cttcgatcaa gtcgtggacg tggatctgaa aggcgcgggt tacgttgcta aacatgcggg      540
tcgtcacttt cgtgaacgct tcgaaaaaga aggcaaaaaa ggtgccctgg tttttaccgc      600
atcaatgtcg ggccatatcg tgaacgttcc gcagttccaa gccacgtata acgcagtcaa      660
agcaggtgtc cgtcactttg ctaaaagtct ggcggtggaa tttgccccgt tcgcacgcgt      720
caacagcgtg tctccgggct acatcaacac cgaaatctca gatttcgttc cgcaggaaac      780
gcaaaataaa tgggtggtcgc tgggtcccgt gggtcgcggc ggtgaaaccg ctgaactggt      840
tgggtgcgtat ctgttcctgg cttcagacgc aggctcgtac gcgaccggtg cggacattgt      900
cgtggatggc ggttatacgc tgccgtaaaa gcttgccggc gcataatgct taagtccaac      960
agaaagtaat cgtattgtac acggccgcgt aatcgaaatt aatacgactc actatagggg     1020
aattgtgagc ggataacaat tccccatctt agtatattag ttaagtataa gaaggagata     1080
tacatatgat gtataaagac ctggaaggca aagtggttgt cattaccggt agctctacgg     1140
gcctgggtaa agcgatggcc atccgttttg ctaccgaaaa agcgaagtg gttgtcaact     1200
accgctcaaa agaagaagaa gcgaacagcg tgctggaaga aatcaaaaaa gttggcggtg     1260
aagcaatcgc tgtcaaaggc gacgttacgg tcgaaagcga tgttattaac ctgggtccaga     1320
gttccatcaa agaatttggc aaactggatg tcatgattaa caatgcgggt atggaaaatc     1380
cgggtgtcatc gcatgaaatg tcaactgtcgg actggaacaa agtgattgat accaatctga     1440
cgggcgcttt tctgggttca cgtgaagcca tcaataactt cgttgaaaac gatatacaag     1500
gcaccgtcat caatatgagc tctgtgcatg aaaaaatccc gtggccgctg tttgtgcaact     1560
atgcccagcag caaaggcggg atgaaactga tgaccgaaac gctggccctg gaatacgcac     1620
cgaaaggtat tcgtgtgaac aatatcggcc cgggtgcgat taacaccacg atcaataaag     1680
aaaaattcgc ggaccgggaa cagcgcgccc atgttgaaaag tatgattccg atgggctata     1740
```

|            |            |            |             |             |            |      |
|------------|------------|------------|-------------|-------------|------------|------|
| tcggtgaacc | ggaagaaatt | gcagctggtg | cggcctggct  | ggccagttcc  | gaagcatcct | 1800 |
| atgtcaccgg | catcacgctg | tttgccgatg | gcggtatgac  | ccagtaccgg  | agcttccaag | 1860 |
| caggtcgcyg | cctcgagcac | caccaccacc | accactgact  | cgagtctggt  | aaagaaaccg | 1920 |
| ctgctgcgaa | atttgaacgc | cagcacatgg | actcgtctac  | tagcgcagct  | taattaacct | 1980 |
| aggctgctgc | caccgctgag | caataactag | cataaccctt  | tggggcctct  | aaacgggtct | 2040 |
| tgagggggtt | tttctgaaa  | ggaggaacta | tatccggatt  | ggcgaatggg  | acgcgccttg | 2100 |
| tagcggcgca | ttaagcgcgg | cgggtgtggt | ggttacgcgc  | agcgtgaccg  | ctacacttgc | 2160 |
| cagcgcctta | gcgcccgcct | ctttcgcttt | cttccttcc   | tttctcgcca  | cgttcgccgg | 2220 |
| ctttccccgt | caagctctaa | atcgggggct | ccctttaggg  | ttccgattta  | gtgctttacg | 2280 |
| gcacctcgac | cccaaaaaac | ttgattaggg | tgatggttca  | cgtagtgggc  | catcgccctg | 2340 |
| atagacgggt | tttcgcccct | tgacgttggg | gtccacgctt  | tttaatagtg  | gactcttggt | 2400 |
| ccaaactgga | acaacactca | accctatctc | ggtctattct  | tttgatttat  | aagggatttt | 2460 |
| gccgatttcg | gcctattggt | taaaaaatga | gctgatttaa  | caaaaattta  | acgcgaattt | 2520 |
| taacaaaata | ttaacgttta | caatttctgg | cggcacgatg  | gcatgagatt  | atcaaaaagg | 2580 |
| atcttcacct | agatcctttt | aaattaaaaa | tgaagtttta  | aatcaatcta  | aagtatatat | 2640 |
| gagtaaactt | ggtctgacag | ttaccaatgc | ttaatcagtg  | aggcacctat  | ctcagcgatc | 2700 |
| tgtctatttc | gttcatccat | agttgcctga | ctccccgctg  | tgtagataac  | tacgatacgg | 2760 |
| gagggcttac | catctggccc | cagtgtgca  | atgataccgc  | gagaccacg   | ctcaccggct | 2820 |
| ccagatttat | cagcaataaa | ccagccagcc | ggaagggccg  | agcgcagaag  | tggctctgca | 2880 |
| actttatccg | cctccatcca | gtctattaat | tgttgccggg  | aagctagagt  | aagtagttcg | 2940 |
| ccagttaata | gtttgcgcaa | cgttgttgcc | attgctacag  | gcatcgtggt  | gtcacgctcg | 3000 |
| tcgtttggtg | tggcttcatt | cagctccggg | tcccaacgat  | caaggcgagt  | tacatgatcc | 3060 |
| cccatgttgt | gcaaaaaagc | ggttagctcc | ttcggctctc  | cgatcgttgt  | cagaagtaag | 3120 |
| ttggccgcag | tgttatcact | catggttatg | gcagcactgc  | ataattctct  | tactgtcatg | 3180 |
| ccatccgtaa | gatgcttttc | tgtgactggt | gagtactcaa  | ccaagtcatc  | ctgagaatag | 3240 |
| tgtatgcggc | gaccgagttg | ctcttgcccg | gcgtcaatac  | gggataatac  | cgcgccacat | 3300 |
| agcagaactt | taaaagtgtc | catcattgga | aaacgcttct  | cggggcgaaa  | actctcaagg | 3360 |
| atcttaccgc | tgttgagatc | cagttcgatg | taaccactc   | gtgcacccaa  | ctgatcttca | 3420 |
| gcatctttta | ctttcaccag | cgtttctggg | tgagcaaaaa  | caggaaggca  | aatgcccgca | 3480 |
| aaaaagggaa | taagggcgac | acggaaatgt | tgaataactca | tactcttctc  | ttttcaatca | 3540 |
| tgattgaagc | atttatcagg | gttattgtct | catgagcggg  | tacatatattg | aatgtattta | 3600 |
| gaaaaataaa | caaataggtc | atgaccaaaa | tcccttaacg  | tgagtttctg  | ttccactgag | 3660 |
| cgtcagaccc | cgtagaaaag | atcaaaggat | cttcttgaga  | tccttttttt  | ctgcgcgtaa | 3720 |
| tctgctgctt | gcaaacaaaa | aaaccaccgc | taccagcggg  | ggtttgtttg  | ccggatcaag | 3780 |

|            |             |             |             |            |            |      |
|------------|-------------|-------------|-------------|------------|------------|------|
| agctaccaac | tctttttccg  | aaggtaactg  | gcttcagcag  | agcgcagata | ccaaatactg | 3840 |
| tccttctagt | gtagccgtag  | ttaggccacc  | acttcaagaa  | ctctgtagca | ccgcctacat | 3900 |
| acctcgctct | gctaatacctg | ttaccagtgg  | ctgctgccag  | tggcgataag | tcgtgtctta | 3960 |
| ccgggttggg | ctcaagacga  | tagttaccgg  | ataaggcgca  | gcggtcgggc | tgaacggggg | 4020 |
| gttcgtgcac | acagcccagc  | ttggagcgaa  | cgacctacac  | cgaactgaga | tacctacagc | 4080 |
| gtgagctatg | agaaagcgcc  | acgcttcccg  | aagggagaaa  | ggcggacagg | tatccggtaa | 4140 |
| gcggcagggg | cggaacagga  | gagcgcacga  | gggagcttcc  | agggggaaac | gcctggatc  | 4200 |
| tttatagtcc | tgtcggggtt  | cgccacctct  | gacttgagcg  | tcgatttttg | tgatgctcgt | 4260 |
| cagggggggc | gagcctatgg  | aaaaacgcca  | gcaacgcggc  | ctttttacgg | ttcctggcct | 4320 |
| tttgctggcc | ttttgctcac  | atgttctttc  | ctgcgttatc  | ccctgattct | gtggataacc | 4380 |
| gtattaccgc | ctttgagtga  | gctgataccg  | ctcgccgcag  | ccgaacgacc | gagcgcagcg | 4440 |
| agtcagtgag | cgaggaagcg  | gaagagcgcc  | tgatgcggta  | ttttctcctt | acgcatctgt | 4500 |
| gcggtatttc | acaccgcata  | tatggtgcac  | tctcagtaca  | atctgctctg | atgccgcata | 4560 |
| gttaagccag | tatacactcc  | gctatcgcta  | cgtgactggg  | tcatggctgc | gccccgacac | 4620 |
| ccgccaacac | ccgctgacgc  | gccctgacgg  | gcttgctcgc  | tcccggcatc | cgcttacaga | 4680 |
| caagctgtga | ccgtctccgg  | gagctgcatg  | tgtcagaggt  | tttcaccgtc | atcaccgaaa | 4740 |
| cgcgcgaggc | agctgcggta  | aagctcatca  | gcgtggctcgt | gaagcgattc | acagatgtct | 4800 |
| gcctgttcat | ccgctccag   | ctcgttgagt  | ttctccagaa  | gcgttaatgt | ctggcttctg | 4860 |
| ataaagcggg | ccatgttaag  | ggcggttttt  | tctgtttgg   | tactgatgc  | ctccgtgtaa | 4920 |
| gggggatttc | tgttcatggg  | ggtaatgata  | ccgatgaaac  | gagagaggat | gctcacgata | 4980 |
| cgggttactg | atgatgaaca  | tgcccggtta  | ctggaacggt  | gtgagggtaa | acaactggcg | 5040 |
| gtatggatgc | ggcgggacca  | gagaaaaatc  | actcagggtc  | aatgccagcg | cttcgttaat | 5100 |
| acagatgtag | gtgttccaca  | gggtagccag  | cagcatcctg  | cgatgcagat | ccggaacata | 5160 |
| atggtgcagg | gcgctgactt  | ccgcgtttcc  | agactttacg  | aaacacggaa | accgaagacc | 5220 |
| attcatgttg | ttgctcaggt  | cgcagacggt  | ttgcagcagc  | agtcgcttca | cgttcgctcg | 5280 |
| cgtatcggtg | attcattctg  | ctaaccagta  | aggcaacccc  | gccagcctag | ccgggtcctc | 5340 |
| aacgacagga | gcacgatcat  | gctagtcatg  | ccccgcgccc  | accggaagga | gctgactggg | 5400 |
| ttgaaggctc | tcaagggcat  | cggctcgagat | cccggtgctt  | aatgagtgag | ctaacttaca | 5460 |
| ttaattgcgt | tgcgctcact  | gcccgccttc  | cagtcgggaa  | acctgtcgtg | ccagctgcat | 5520 |
| taatgaatcg | gccaacgcgc  | ggggagaggg  | ggtttgcgta  | ttgggcgcca | gggtggtttt | 5580 |
| tcttttcacc | agtgagacgg  | gcaacagctg  | attgcccttc  | accgcctggc | cctgagagag | 5640 |
| ttgcagcaag | cggccacgc   | tggtttgccc  | cagcaggcga  | aaatcctggt | tgatggtggg | 5700 |
| taacggcggg | atataacatg  | agctgtcttc  | ggtatcgtcg  | tatcccacta | ccgagatgtc | 5760 |
| cgcaccaacg | cgcagcccgg  | actcggtaat  | ggcgcgcatt  | gcgcccagcg | ccatctgatc | 5820 |

gttggcaacc agcatcgcag tgggaacgat gccctcattc agcatttgca tggtttgttg 5880  
 aaaaccggac atggcactcc agtcgccttc ccgttccgct atcggctgaa tttgattgcg 5940  
 agtgagatat ttatgccagc cagccagacg cagacgcgcc gagacagaac ttaatggggc 6000  
 cgctaacagc gcgatttgct ggtgacccaa tgcgaccaga tgctccacgc ccagtgcgct 6060  
 accgtcttca tgggagaaaa taatactggt gatgggtgtc tggtcagaga catcaagaaa 6120  
 taacgccgga acattagtgc aggcagcttc cacagcaatg gcatcctggt catccagcgg 6180  
 atagttaatg atcagcccac tgacgcgctt cgcgagaaga ttgtgcaccg ccgctttaca 6240  
 ggcttcgacg ccgcttcggt ctaccatcga caccaccacg ctggcaccca gttgatcggc 6300  
 gcgagattta atcgcgcgga caatttgcgga cggcgcgtgc agggccagac tggaggtggc 6360  
 aacgccaatc agcaacgact gtttgcccgc cagttggtgt gccacgcggt tgggaatgta 6420  
 attcagctcc gccatcgccg cttccacttt ttcccgcggt ttcgcagaaa cgtggctggc 6480  
 ctggttcacc acgcgggaaa cggctctgata agagacaccg gcatactctg cgacatcgta 6540  
 taacgttact ggtttcacat tcaccaccct gaattgactc tcttccgggc gctatcatgc 6600  
 cataccgca aaggttttgc gccattcgat ggtgtccggg atctcgacgc tctcccttat 6660  
 gcgactcctg cattaggaag cagcccagta gtaggttgag gccggtgagc accgccgccg 6720  
 caaggaatgg tgcattgcaag gagatggcgc ccaacagtcc cccggccacg gggcctgcca 6780  
 ccatacccac gccgaaacaa gcgctcatga gcccgaaagt gcgagcccga tcttccccat 6840  
 cggatgatgc ggcgatatag gcgccagcaa ccgcacctgt ggcgccggtg atgccggcca 6900  
 cgatgcgctc ggcgtagagg atcgagatcg atctcgatcc cgcgaaatta atacgactca 6960  
 ctata 6965

<210> 2  
 <211> 7838  
 <213> pETDuet1-omp-crs,omp-gdh (**pETDuet1-GJCCG**)

**Plasmid pETDuet1-GJSCG coexpresses carbonyl reductase and glucose dehydrogenase on the surface of *E. coli* strain**

ggggaattgt gagcggataa caattcccct ctagaaataa ttttgtttaa ctttaagaag 60  
 gagatatacc atgggcaaag ctactaaact ggtactgggt gccgtcatcc tgggctcaac 120  
 gctgctggcg ggctgctcgt caaatgcgaa aatcgatcaa ggtatcaatc cgtatgtcgg 180  
 ctttgaaatg ggctatgatt ggctgggtcg tatgccgtac aaaggcagcg ttgaaaacgg 240  
 tgccataaaa gcacagggcg tccaactgac cgcgaaactg ggttatccga ttaccgatga 300  
 cctggatatac tacacgcgctc tgggcggtat ggtgtggcgt gcagacacca aaagtaacgt 360  
 ttacggcaaa aatcatgata cgggtgtttc cccggtcttt gccggcgggtg tggaaatgct 420  
 aattaccccg gaaatcgcta cgcgtctgga ataccagtgg accaacaata ttggcgacgc 480  
 acataccatc ggtacgcgcc cggataatgg cattccgggt atggcgaaaa acttctctaa 540  
 tgtggaatat ccggcaccgc cgccggcaca caccaaaaaac gaaagcctgc aagtgctgga 600

|            |             |            |             |            |             |      |
|------------|-------------|------------|-------------|------------|-------------|------|
| tctgtttaaa | ctgaatggca  | aagttgcgtc | tattacgggt  | agctctagt  | gcatcggtta  | 660  |
| tgcgctggcc | gaagcattcg  | ctcaagttgg | cgctgacgtc  | gcgatttgg  | acaacagcca  | 720  |
| cgatgcgacc | ggcaaagcgg  | aagcgctggc | gaaaaaata   | ggtgttaaag | tcaaagccta  | 780  |
| caaagcaaat | gtctcctcat  | cggatgccgt | gaaacagacc  | attgaacagc | aatcaaaaga  | 840  |
| ctttggccat | ctggatattg  | tggttgctaa | cgcgggcatc  | ccgtggacga | agggtgcgta  | 900  |
| tattgaccag | gatgacgata  | aacacttcga | tcaagtcgtg  | gacgtggatc | tgaaaggcgt  | 960  |
| gggttacgtt | gctaaacatg  | cgggtcgtca | ctttcgtgaa  | cgcttcgaaa | aagaaggcaa  | 1020 |
| aaaaggtgcc | ctggttttta  | ccgcatcaat | gtcggggccat | atcgtgaacg | ttccgcagtt  | 1080 |
| ccaagccacg | tataatgcgg  | ccaaagcagg | tgtccgctac  | tttgctaaaa | gtctggcgg   | 1140 |
| ggaatttgcc | ccgttcgcac  | gcgtcaacag | cgtgtctccg  | ggctacatca | acaccgaaat  | 1200 |
| ctcagatttc | gttccgcagg  | aaacgcaaaa | taaatgggtg  | tcgctggtcc | cgctgggtcg  | 1260 |
| cggcggtgaa | accgctgaac  | tggttgggtc | gtatctgttc  | ctggcttcag | acgcaggctc  | 1320 |
| gtacgcgacc | ggtacggaca  | ttatcgtgga | tggcggttat  | acgctgccgt | aaaagcttgc  | 1380 |
| ggccgcataa | tgcttaagtc  | gaacagaaa  | taatcgtatt  | gtacacggcc | gcataatcga  | 1440 |
| aattaatacg | actcaactata | ggggaattgt | gagcggataa  | caattcccca | tcttagtata  | 1500 |
| ttagttaagt | ataagaagga  | gatatacata | tgggcaaaagc | tactaaactg | gtactgggtg  | 1560 |
| ccgtcatcct | gggctcaacg  | ctgctggcgg | gctgctcgtc  | aatgcgaaa  | atcgatcaag  | 1620 |
| gtatcaatcc | gtatgtcggc  | tttgaaatgg | gctatgattg  | gctgggtcgt | atgccgtaca  | 1680 |
| aaggcagcgt | tgaaaacggt  | gcctataaa  | cacagggcgt  | ccaactgacc | gcgaaactgg  | 1740 |
| gttatccgat | taccgatgac  | ctggatatct | acacgcgtct  | gggcggtatg | gtgtggcgtg  | 1800 |
| cagacaccaa | aagtaacggt  | tacggcaaaa | atcatgatac  | gggtgtttcc | ccggtctttg  | 1860 |
| ccggcgggtg | ggaatatgca  | attaccccgg | aaatcgctac  | gcgtctggaa | taccagtgga  | 1920 |
| ccaacaatat | tggcgacgca  | cataccatcg | gtacgcgccc  | ggataatggc | attccgggta  | 1980 |
| tgtataaaga | cctggaaggc  | aaagtggttg | tcattactgg  | tagcgctacg | ggcctgggta  | 2040 |
| aagcgatggc | catccgtttt  | gtaccgaaa  | aagcgaaggt  | ggttgtcaac | taccgctcaa  | 2100 |
| aagaagaaga | agcgaacagc  | gtgctggaag | aatcaaaaa   | agttggcgg  | gaagcaatcg  | 2160 |
| ctgtcaaagg | cgacgttacg  | gtcgaaagcg | atgttattaa  | cctggtccag | agttccatca  | 2220 |
| aagaatttgg | caaactggat  | gtcatgatta | acaatgcggg  | tatggaaaat | ccggtgtcat  | 2280 |
| cgcatgaaat | gtcactgtcg  | gactggaaca | aagtgattga  | taccaatctg | acgggcgctt  | 2340 |
| ttctgggttc | acgtgaagcc  | atcaataact | tcgttgaaaa  | cgatatcaaa | ggcaccgtca  | 2400 |
| tcaatatgag | ctctgtgcat  | gaaaaaatcc | cgtggccgct  | gtttgtgcac | tatgcggcca  | 2460 |
| gcaaaggcgg | tatgaaactg  | atgaccaaaa | cgctggccct  | ggaatacgca | ccgaaaggta  | 2520 |
| ttcgtgtgaa | caatatcggc  | ccgggtgcga | taaaccacc   | gatcaataaa | gaaaaattcg  | 2580 |
| cggacccgga | acagcgcgcc  | gatgttgaaa | gtatgattcc  | gatgggctat | atcgggtgaac | 2640 |

|             |            |            |            |             |             |      |
|-------------|------------|------------|------------|-------------|-------------|------|
| cggacgaaat  | tgcagctggt | gcggcctggc | tggccagttc | cgaagcatgc  | tatgtcacccg | 2700 |
| gcatcacgct  | gtttgccgat | ggcggatga  | cccagtacc  | gagcttcaa   | gcaggtcgcg  | 2760 |
| gctgactcga  | gtctggtaaa | gaaaccgctg | ctgcgaaatt | tgaacgccag  | cacatggact  | 2820 |
| cgtctactag  | cgcagcttaa | ttaacctagg | ctgctgccac | cgctgagcaa  | taactagcat  | 2880 |
| aacccttgg   | ggcctctaaa | cgggtcttga | ggggttttt  | gctgaaagga  | ggaactatat  | 2940 |
| ccggattggc  | gaatgggacg | cgccctgtag | cgccgcatta | agcgcggcgg  | gtgtgggtgt  | 3000 |
| tacgcgcagc  | gtgaccgcta | cacttgccag | cgccctagcg | cccgcctcctt | tcgctttctt  | 3060 |
| cccttccttt  | ctcgccacgt | tcgcccgtt  | tcccgtcaa  | gctctaaatc  | gggggctccc  | 3120 |
| tttagggttc  | cgatttagtg | ctttacggca | cctcgacccc | aaaaaacttg  | attaggggtga | 3180 |
| tggttcacgt  | agtgggcat  | cgccctgata | gacggttttt | cgcccttga   | cgttggagtc  | 3240 |
| cacgttcttt  | aatagtggac | tcttgttcca | aactggaaca | acactcaacc  | ctatctcggc  | 3300 |
| ctattctttt  | gatttataag | ggattttgcc | gatttcggcc | tattgggttaa | aaaatgagct  | 3360 |
| gatttaacaa  | aaatthaacg | cgaatthtaa | caaaatatta | acgtttacaa  | tttctggcgg  | 3420 |
| cacgatggca  | tgagattatc | aaaaaggatc | ttcacctaga | tccttttaaa  | ttaaaaatga  | 3480 |
| agttttaaat  | caatctaaag | tatatatgag | taaacttggc | ctgacagtta  | ccaatgctta  | 3540 |
| atcagtgagg  | cacctatctc | agcgatctgt | ctatttcggt | catccatagt  | tgctgactc   | 3600 |
| cccgtcgtgt  | agataactac | gatacgggag | ggcttaccat | ctggccccag  | tgctgcaatg  | 3660 |
| ataccgcgag  | accacgctc  | accggctcca | gatttatcag | caataaacca  | gccagccgga  | 3720 |
| agggccgagc  | gcagaagtgg | tcctgcaact | ttatccgcct | ccatccagtc  | tattaattgt  | 3780 |
| tgccgggaag  | ctagagtaag | tagttcgcca | gttaatagtt | tgcgcaacgt  | tgttgccatt  | 3840 |
| gctacaggca  | tcgtgggtgc | acgctcgtcg | tttgggatgg | cttcattcag  | ctccggttcc  | 3900 |
| caacgatcaa  | ggcgagttac | atgatcccc  | atgttgtgca | aaaaagcggc  | tagctccttc  | 3960 |
| ggcctccga   | tcgttgtcag | aagtaagttg | gccgcagtgt | tatcactcat  | ggttatggca  | 4020 |
| gcaactgcata | attctcttac | tgtcatgcc  | tccgtaagat | gcttttctgt  | gactgggtgag | 4080 |
| tactcaacca  | agtcattctg | agaatagtgt | atgcggcgac | cgagttgctc  | ttgcccggcg  | 4140 |
| tcaatacggg  | ataataccgc | gccacatagc | agaactttaa | aagtgctcat  | cattggaaaa  | 4200 |
| cgttcttcgg  | ggcgaaaact | ctcaaggatc | ttaccgctgt | tgagatccag  | ttcgatgtaa  | 4260 |
| cccactcgtg  | cacccaactg | atcttcagca | tcttttactt | tcaccagcgt  | ttctgggtga  | 4320 |
| gcaaaaacag  | gaaggcaaaa | tgccgcaaaa | aagggataaa | ggcgacacg   | gaaatgttga  | 4380 |
| atactcatac  | tcttcctttt | tcaatcatga | ttgaagcatt | tatcagggtt  | attgtctcat  | 4440 |
| gagcggatac  | atatttgaat | gtatttagaa | aaataaacia | ataggtcatg  | acaaaaatcc  | 4500 |
| cttaacgtga  | gttttcggtc | cactgagcgt | cagaccccg  | agaaaagatc  | aaaggatctt  | 4560 |
| cttgagatcc  | ttttttctg  | cgcgtaatct | gctgcttgca | aacaaaaaaa  | ccaccgctac  | 4620 |
| cagcgggtgt  | ttgtttgccg | gatcaagagc | taccaactct | ttttccgaag  | gtaactggct  | 4680 |



|             |             |            |             |            |            |      |
|-------------|-------------|------------|-------------|------------|------------|------|
| tcagcagagc  | gcagatacca  | aatactgtcc | ttctagtgta  | gccgtagtta | ggccaccact | 4740 |
| tcaagaactc  | tgtagcaccg  | cctacatacc | tcgctctgct  | aatcctgtta | ccagtggctg | 4800 |
| ctgccagtgg  | cgataagtcg  | tgtcttaccg | ggttggactc  | aagacgatag | ttaccggata | 4860 |
| aggcgcagcg  | gtcgggctga  | acgggggggt | cgtgcacaca  | gcccagcttg | gagcgaacga | 4920 |
| cctacaccga  | actgagatac  | ctacagcgtg | agctatgaga  | aagcgcacg  | cttcccgaag | 4980 |
| ggagaaaggc  | ggacaggtat  | ccggtaagcg | gcagggctcg  | aacaggagag | cgcacgaggg | 5040 |
| agcttccagg  | gggaaacgcc  | tggtatcttt | atagtccctgt | cgggtttcgc | cacctctgac | 5100 |
| ttgagcgtcg  | atTTTTgtga  | tgctcgtcag | gggggcggag  | cctatggaaa | aacgccagca | 5160 |
| acggggcctt  | tttacggttc  | ctggcctttt | gctggccttt  | tgctcacatg | ttctttcctg | 5220 |
| cgttatcccc  | tgattctgtg  | gataaccgta | ttaccgcctt  | tgagtgagct | gataccgctc | 5280 |
| gccgcagccg  | aacgaccgag  | cgcagcaggt | cagtgagcga  | ggaagcggaa | gagcgcctga | 5340 |
| tgcggtatTT  | tctccttacg  | catctgtgcg | gtatttcaca  | ccgcatatat | ggtgcactct | 5400 |
| cagtacaatc  | tgctctgatg  | ccgcatagtt | aagccagtat  | acactccgct | atcgctacgt | 5460 |
| gactgggtca  | tggctgcgcc  | ccgacacccg | ccaacacccg  | ctgacgcgcc | ctgacgggct | 5520 |
| tgtctgctcc  | cgccatccgc  | ttacagacaa | gctgtgaccg  | tctccgggag | ctgcatgtgt | 5580 |
| cagaggTTTT  | caccgtcatc  | accgaaacgc | gcgaggcagc  | tgcggtaaag | ctcatcagcg | 5640 |
| tggctcgtgaa | gcgattcaca  | gatgtctgcc | tgttcatccg  | cgtccagctc | gttgagtttc | 5700 |
| tccagaagcg  | ttaatgtctg  | gcttctgata | aagcgggcca  | tgtaagggc  | ggtTTTTtcc | 5760 |
| tgTTTTggtca | ctgatgcctc  | cgtgtaaggg | ggatttctgt  | tcatgggggt | aatgataccg | 5820 |
| atgaaacgag  | agaggatgct  | cacgatacgg | gttactgatg  | atgaacatgc | ccggttactg | 5880 |
| gaacgTTgtg  | agggtaaaca  | actggcggta | tggatgcggc  | gggaccagag | aaaaatcact | 5940 |
| cagggTcaat  | gccagcgctt  | cgTTaataca | gatgtaggtg  | ttccacaggg | tagccagcag | 6000 |
| catcctgcga  | tgccagatccg | gaacataatg | gtgcagggcg  | ctgacttccg | cgTTTTcaga | 6060 |
| ctttacgaaa  | cacggaaacc  | gaagaccatt | catgTTgttg  | ctcaggtcgc | agacgTTTTg | 6120 |
| cagcagcagt  | cgcttcacgt  | tcgctcgcgt | atcggtgatt  | cattctgcta | accagtaagg | 6180 |
| caacccccgc  | agcctagccg  | ggtcctcaac | gacaggagca  | cgatcatgct | agtcatgccc | 6240 |
| cgcgccccacc | ggaaggagct  | gactgggTTg | aaggctctca  | agggcatcgg | tcgagatccc | 6300 |
| ggTgcctaat  | gagtgagcta  | acttacatta | attgcgTTgc  | gctcactgcc | cgctttccag | 6360 |
| tcgggaaacc  | tgctcgtgcca | gctgcattaa | tgaatcggcc  | aacgcgcggg | gagaggcggT | 6420 |
| ttgcgTattg  | ggcgccaggg  | tggtTTTTct | tttcaccagt  | gagacgggca | acagctgatt | 6480 |
| gcccttcacc  | gcctggccct  | gagagagTTg | cagcaagcgg  | tccacgctgg | tttgccccag | 6540 |
| cagggcgaaaa | tcctgTTTga  | tggTggtTaa | cggcgggata  | taacatgagc | tgtcttcggT | 6600 |
| atcgTcgtat  | cccactaccg  | agatgtccgc | accaacgcgc  | agcccggact | cggTaatggc | 6660 |
| gcgcattgcg  | cccagcgcca  | tctgatcgTT | ggcaaccagc  | atcgcagTgg | gaacgatgcc | 6720 |

ctcattcagc atttgcattg tttggtgaaa accggacatg gcaactccagt cgccttcccc 6780  
ttccgctatc ggctgaattt gattgcgagt gagatattta tgccagccag ccagacgcag 6840  
acgcgcccag acagaactta atgggccccg taacagcgcg atttgctggt gacccaatgc 6900  
gaccagatgc tccacgcccc gtcgctgacc gtcttcatgg gagaaaataa tactgttgat 6960  
gggtgtctgg tcagagacat caagaaataa cgccggaaca ttagtgacag cagcttccac 7020  
agcaatggca tcttggctat ccagcggata gttaatgatc agcccactga cgcgttgccg 7080  
gagaagattg tgcaccgccc ctttacaggc ttcgacgccc cttcgttcta ccatcgacac 7140  
caccacgctg gcacccagtt gatcggcgcg agatttaatc gccgcgacaa tttgcgacgg 7200  
cgcgtgcagg gccagactgg aggtggcaac gccaatcagc aacgactggt tgcccgccag 7260  
ttgttggtgccc acgcggttgg gaatgtaatt cagctccgcc atcgccgctt ccactttttc 7320  
ccgcgttttc gcagaaacgt ggctggcctg gttcaccacg cgggaaacgg tctgataaga 7380  
gacaccggca tactctgcga catcgtataa cgttactggt ttcacattca ccaccctgaa 7440  
ttgactctct tccgggcccgt atcatgccat accgcgaaaag gttttgcgcc attcgatggt 7500  
gtccgggatc tcgacgctct cccttatgcy actcctgcat taggaagcag cccagtagta 7560  
ggttgaggcc gttgagcacc gccgcccga ggaatggtgc atgcaaggag atggcgccca 7620  
acagtcccc ggccacgggg cctgccacca taccacgccc gaaacaagcg ctcattgagcc 7680  
cgaagtggcg agcccgatct tccccatcgg tgatgtcggc gatataggcg ccagcaaccg 7740  
cacctgtggc gccggtgatg ccggccacga tgcgtccggc gtagaggatc gagatcgatc 7800  
tcgatcccgc gaaattaata cgactcacta tacatatg 7838

<210> 3  
<211> 4889  
<213> pET23(a)-omp-crs (pET23(a)-GJSC)

**Plasmid pET23(a)-GJSC expresses carbonyl reductase on the surface of *E. coli* strain**

tggcgaatgg gacgcgccct gtagcggcgc attaacgcgc gcgggtgtgg tggttacgcg 60  
cagcgtgacc gctacacttg ccagcgcacct agcgcgccgt ctttccgctt tcttcccttc 120  
ctttctcgcc acgttcgccc gctttccccg tcaagctcta aatcgggggc tccctttagg 180  
gttccgattt agtgccttac ggcacctcga ccccaaaaaa cttgattagg gtgatggttc 240  
acgtagtggg ccatcgccct gatagacggg ttttccgccc ttgacgcttg agtccacgct 300  
ctttaatagt ggactcttgt tccaaactgg aacaacactc aaccctatct cggctctattc 360  
ttttgattta taagggattt tgccgatttc ggcctattgg ttaaaaaatg agctgattta 420  
acaaaaattt aacgcgaatt ttaacaaaat attaacgttt acaatttcag gtggcacttt 480  
tcggggaaat gtgcgcggaa cccctatttg tttatttttc taaatacatt caaatatgta 540  
tccgctcatg agacaataac cctgataaat gcttcaataa tattgaaaaa ggaagagtat 600  
gagtattcaa catttccgtg tcgccccttat tccctttttt gcggcatttt gccttctgt 660

|            |             |            |             |            |             |      |
|------------|-------------|------------|-------------|------------|-------------|------|
| ttttgctcac | ccagaaacgc  | tggtgaaagt | aaaagatgct  | gaagatcagt | tgggtgcacg  | 720  |
| agtgggttac | atcgaactgg  | atctcaacag | cggtaaagatc | cttgagagtt | ttcgccccga  | 780  |
| agaacgtttt | ccaatgatga  | gcacttttaa | agttctgcta  | tgtggcgcg  | tattatcccc  | 840  |
| tattgacgcc | gggcaagagc  | aactcggtcg | ccgcatacac  | tattctcaga | atgacttggt  | 900  |
| tgagtactca | ccagtcacag  | aaaagcatct | tacggatggc  | atgacagtaa | gagaattatg  | 960  |
| cagtgtgcc  | ataacatga   | gtgataaac  | tgcggccaac  | ttacttctga | caacgatcgg  | 1020 |
| aggaccgaag | gagctaaccg  | cttttttgca | caacatgggg  | gatcatgtaa | ctcgccttga  | 1080 |
| tcgttgggaa | ccggagctga  | atgaagccat | accaaacgac  | gagcgtgaca | ccacgatgcc  | 1140 |
| tgcagcaatg | gcaacaacgt  | tgcgcaaact | attaactggc  | gaactactta | ctctagcttc  | 1200 |
| ccggcaacaa | ttaatagact  | ggatggaggc | ggataaagtt  | gcaggaccac | ttctgcgctc  | 1260 |
| ggcccttccg | gctggctggt  | ttattgctga | taaatctgga  | gccggtgagc | gtgggtctcg  | 1320 |
| cggtatcatt | gcagcactgg  | ggccagatgg | taagccctcc  | cgtatcgtag | ttatctacac  | 1380 |
| gacggggagt | caggcaacta  | tggatgaacg | aaatagacag  | atcgctgaga | taggtgcctc  | 1440 |
| actgattaag | cattggtaac  | tgtcagacca | agtttactca  | tatatacttt | agattgattt  | 1500 |
| aaaacttcat | ttttaattta  | aaaggatcta | ggatgaagatc | ctttttgata | atctcatgac  | 1560 |
| caaaatccct | taacgtgagt  | tttcgttcca | ctgagcgtca  | gaccccgtag | aaaagatcaa  | 1620 |
| aggatcttct | tgagatcctt  | tttttctgcg | cgtaatctgc  | tgcttgcaaa | caaaaaaacc  | 1680 |
| accgctacca | gcgggtggtt  | gtttgcccga | tcaagagcta  | ccaactcttt | ttccgaaggt  | 1740 |
| aactggcttc | agcagagcgc  | agataccaaa | tactgtcctt  | ctagtgtagc | cgtagttagg  | 1800 |
| ccaccacttc | aagaactctg  | tagcaccgcc | tacatacctc  | gctctgctaa | tcctgttacc  | 1860 |
| agtggctgct | gccagtgggc  | ataagtcgtg | tcttaccggg  | ttggactcaa | gacgatagtt  | 1920 |
| accggataag | gcgcagcggc  | cgggctgaac | ggggggttcg  | tgcacacagc | ccagcttggg  | 1980 |
| gcgaacgacc | tacaccgaac  | tgagatacct | acagcgtgag  | ctatgagaaa | gcgccacgct  | 2040 |
| tcccgaaggg | agaaaggcgg  | acaggtatcc | ggtaagcggc  | agggtcggaa | caggagagcg  | 2100 |
| cacgagggag | cttccagggg  | gaaacgcctg | gtatctttat  | agtcctgtcg | ggtttcgcca  | 2160 |
| cctctgactt | gagcgtcgat  | ttttgtgatg | ctcgtcaggg  | gggcggagcc | tatggaaaaa  | 2220 |
| cgccagcaac | goggcctttt  | tacggttcct | ggccttttgc  | tggccttttg | ctcacatggt  | 2280 |
| ctttcctgcg | ttatccccctg | attctgtgga | taaccgtatt  | accgcctttg | agtgagctga  | 2340 |
| taccgctcgc | cgcagccgaa  | cgaccgagcg | cagcagatca  | gtgagcgagg | aagcgggaaga | 2400 |
| gcgcctgatg | cggtattttc  | tccttacgca | tctgtgcggc  | atttcacacc | gcataatggt  | 2460 |
| tgcactctca | gtacaatctg  | ctctgatgcc | gcatagttaa  | gccagtatac | actccgctat  | 2520 |
| cgctacgtga | ctgggtcatg  | gctgcgcccc | gacaccgcgc  | aacaccgcct | gacgcgcctt  | 2580 |
| gacgggcttg | tctgctcccg  | gcatccgctt | acagacaagc  | tgtgaccgtc | tccgggagct  | 2640 |
| gcatgtgtca | gaggttttca  | ccgtcatcac | cgaaacgcgc  | gaggcagctg | cggtaaagct  | 2700 |

|            |             |             |             |            |             |      |
|------------|-------------|-------------|-------------|------------|-------------|------|
| catcagcgtg | gtcgtgaagc  | gattcacaga  | tgtctgcctg  | ttcatccgcg | tccagctcgt  | 2760 |
| tgagtttctc | cagaagcggt  | aatgtctggc  | ttctgataaa  | gcgggccatg | ttaagggcgg  | 2820 |
| ttttttcctg | tttggtcact  | gatgcctccg  | tgtaagggggg | atctctgttc | atgggggtaa  | 2880 |
| tgataccgat | gaaacgagag  | aggatgctca  | cgatacgggt  | tactgatgat | gaacatgccc  | 2940 |
| ggttactgga | acgttgtgag  | ggtaacaac   | tggcggtatg  | gatgcggcgg | gaccagagaa  | 3000 |
| aaatcactca | gggtcaatgc  | cagcgccttcg | ttaatacaga  | tgtaggtggt | ccacagggta  | 3060 |
| gccagcagca | tcctgcgatg  | cagatccgga  | acataatggg  | gcagggcgct | gacttccgcg  | 3120 |
| tttccagact | ttacgaaaca  | cggaaaccga  | agaccattca  | tgttggtgct | caggtcgcag  | 3180 |
| acgttttgca | gcagcagtcg  | cttcacgttc  | gctcgcgat   | cggtgattca | ttctgctaac  | 3240 |
| cagtaaggca | accccgccag  | cctagccggg  | tcctcaacga  | caggagcacg | atcatgcgca  | 3300 |
| cccgtggcca | ggaccaaacg  | ctgcccgaga  | tctcgatccc  | gcgaaattaa | tacgactcac  | 3360 |
| tatagggaga | ccacaacggg  | ttccctctag  | aaataatttt  | gtttaacttt | aagaaggaga  | 3420 |
| tatacatatg | aaagctacta  | aactgggtact | gggtgccgctc | atcctgggct | caacgctgct  | 3480 |
| ggcgggctgc | tcgtcaaagt  | cgaaaatcga  | tcaaggtatc  | aatccgatg  | tcggctttga  | 3540 |
| aatgggctat | gattggctgg  | gtcgtatgcc  | gtacaaaaggc | agcgttgaaa | acgggtgccta | 3600 |
| taaagcacag | ggcgtccaac  | tgaccgcgaa  | actgggttat  | ccgattaccg | atgacctgga  | 3660 |
| tatctacacg | cgtctgggcg  | gatatggtgtg | gcgtgcagac  | acaaaagta  | acgtttacgg  | 3720 |
| caaaaatcat | gatacgggtg  | tttccccggg  | ctttgccggc  | gggtggaat  | atgcaattac  | 3780 |
| cccggaaatc | gctacgcgctc | tggaaatacca | gtggaccaaac | aatattggcg | acgcacatac  | 3840 |
| catcggtagc | cgcccggata  | atggcattcc  | gggtatggcg  | aaaaacttct | ctaattgtgga | 3900 |
| atatccggca | ccgccgccgg  | cacacaccaa  | aaacgaaagc  | ctgcaagtgc | tggatctggt  | 3960 |
| taaactgaat | ggcaaagttg  | cgtctattac  | gggtagctct  | agtggcatcg | gttatgcgct  | 4020 |
| ggccgaagca | ttcgtcaag   | ttggcgctga  | cgtcgcgatt  | tggtaaca   | gccacgatgc  | 4080 |
| gaccggcaaa | gcggaagcgc  | tggcgaaaaa  | atatgggtgtt | aaagtcaaag | cctacaaagc  | 4140 |
| aaatgtctcc | tcacgggatg  | ccgtgaaaca  | gaccattgaa  | cagcaaatca | aagactttgg  | 4200 |
| ccatctggat | attgtgggtg  | ctaacgcggg  | catcccgtgg  | acgaagggtg | cgtatattga  | 4260 |
| ccaggatgac | gataaacact  | tcgatcaagt  | cgtggacgtg  | gatctgaaag | gcgtgggtta  | 4320 |
| cgttgctaaa | catgcgggtc  | gtcacttttcg | tgaacgcttc  | gaaaaagaag | gcaaaaaagg  | 4380 |
| tgccctgggt | tttaccgcat  | caatgtcggg  | ccatatcgtg  | aacgttccgc | agttccaagc  | 4440 |
| cacgtataat | gcggccaaag  | caggtgtccg  | tcactttgct  | aaaagtctgg | cggtggaatt  | 4500 |
| tgccccgttc | gcacgcgtca  | acagcgtgtc  | tccgggctac  | atcaacaccg | aaatctcaga  | 4560 |
| tttcgttccg | caggaaacgc  | aaaataaatg  | gtggtcgctg  | gtcccgctgg | gtcgcggcgg  | 4620 |
| tgaaaccgct | gaactgggtg  | gtgcgtatct  | gttcctggct  | tcagacgcag | gctcgtacgc  | 4680 |
| gaccggtagc | gacattatcg  | tggatggcgg  | ttatacgcgtg | ccgtaactcg | agcaccacca  | 4740 |

ccaccaccac tgagatccgg ctgctaacaa agccccgaaag gaagctgagt tggctgctgc 4800  
caccgctgag caataactag cataaccctc tggggcctct aaacgggtct tgaggggttt 4860  
tttgctgaaa ggaggaacta tatccggat 4889

<210> 4  
<212> DNA  
<213> pET29(a)-omp-gdh (pET29(a)-GJSG)

**Plasmid pET29(a)-GJSG expresses glucose dehydrogenase on the surface of *E. coli* strain**

tggcgaatgg gacgcgccct gtagcggcgc attaagcgcg gcgggtgtgg tggttacgcg 60  
cagcgtgacc gctacacttg ccagcgcctc agcgcgccgt cctttcgcct tcttcccttc 120  
ctttctcgcc acgttcgccc gctttccccg tcaagctcta aatcgggggc tcccttagg 180  
gttccgattt agtgctttac ggcacctcga cccccaaaaa cttgattagg gtgatggttc 240  
acgtagtggg ccatcgccct gatagacggg ttttcgccct ttgacgttgg agtccacggt 300  
ctttaatagt ggactcttgt tccaaactgg aacaacactc aaccctatct cggctctattc 360  
ttttgattta taagggattt tgccgatttc ggcctattgg ttaaaaaatg agctgattta 420  
acaaaaattt aacgcgaatt ttaacaaaat attaacgttt acaatttcag gtggcacttt 480  
tcggggaaat gtgcgcggaa cccctatttg tttatttttc taaatacatt caaatatgta 540  
tccgctcatg aattaattct tagaaaaact catcgagcat caaatgaaac tgcaatttat 600  
tcatatcagg attatcaata ccatattttt gaaaaagccg tttctgtaat gaaggagaaa 660  
actcaccgag gcagttccat aggatggcaa gatcctggta tcggtctgcg attccgactc 720  
gtccaacatc aatacaacct attaatttcc cctcgtcaaa aataaggtta tcaagtgaga 780  
aatcaccatg agtgacgact gaatccggtg agaatggcaa aagtttatgc atttctttcc 840  
agacttgttc aacaggccag ccattacgct cgtcatcaaa atcactcgca tcaaccaaac 900  
cgttattcat tcgtgattgc gcctgagcga gacgaaatac gcgatcgctg ttaaaaggac 960  
aattacaaac aggaatcgaa tgcaaccggc gcaggaacac tgccagcgca tcaacaatat 1020  
tttcacctga atcaggatat tcttctaata cctggaatgc tgttttcccg gggatcgcag 1080  
tggtgagtaa ccatgcatca tcaggagtac ggataaaatg cttgatggtc ggaagaggca 1140  
taaattccgt cagccagttt agtctgacca tctcatctgt aacatcattg gcaacgctac 1200  
ctttgccatg tttcagaaac aactctggcg catcgggctt cccatacaat cgatagattg 1260  
tcgcacctga ttgcccgaca ttatcgcgag cccatttata cccatataaa tcagcatcca 1320  
tgttggaatt taatcgcggc ctagagcaag acgtttcccg ttgaatatgg ctcataacac 1380  
cccttgattt actgtttatg taagcagaca gttttattgt tcatgaccaa aatcccttaa 1440  
cgtgagtttt cgttccactg agcgtcagac cccgtagaaa agatcaaagg atcttcttga 1500  
gatccttttt ttctgcgcgt aatctgctgc ttgcaacaaa aaaaaccacc gctaccagcg 1560  
gtggtttggt tgccggatca agagctacca actctttttc cgaaggtaac tggcttcagc 1620

|            |             |            |             |             |             |      |
|------------|-------------|------------|-------------|-------------|-------------|------|
| agagcgcaga | taccaaatac  | tgtccttcta | gtgtagccgt  | agttaggcca  | ccacttcaag  | 1680 |
| aactctgtag | caccgcctac  | atacctcgct | ctgctaatac  | tgttaccagt  | ggctgctgcc  | 1740 |
| agtggcgata | agtcggtgtc  | taccgggttg | gactcaagac  | gatagttacc  | ggataaaggcg | 1800 |
| cagcggtcgg | gctgaacggg  | gggttcgtgc | acacagccca  | gcttggagcg  | aacgacctac  | 1860 |
| accgaactga | gatacctaca  | gcgtgagcta | tgagaaagcg  | ccacgcttcc  | cgaagggaga  | 1920 |
| aaggcggaca | ggtatccggt  | aagcggcagg | gtcggaacag  | gagagcgcac  | gagggagctt  | 1980 |
| ccagggggaa | acgcctggta  | tctttatagt | cctgtcgggt  | ttcgccacct  | ctgacttgag  | 2040 |
| cgtcgatttt | tgtgatgctc  | gtcagggggg | cggagcctat  | ggaaaaacgc  | cagcaacgcg  | 2100 |
| gcctttttac | ggttcctggc  | cttttgctgg | ccttttgctc  | acatgttctt  | tcctgcgtta  | 2160 |
| tcccctgatt | ctgtggataa  | ccgtattacc | gcctttgagt  | gagctgatac  | cgctcgccgc  | 2220 |
| agccgaacga | ccgagcgcag  | cgagtcagtg | agcgaggaag  | cggaagagcg  | cctgatgcgg  | 2280 |
| tattttctcc | ttacgcatct  | gtgcggtatt | tcacaccgca  | tatatggtgc  | actctcagta  | 2340 |
| caatctgctc | tgatgccgca  | tagttaagcc | agtatacact  | ccgctatcgc  | tacgtgactg  | 2400 |
| ggtcatggct | gcgccccgac  | acccgccaac | acccgctgac  | gcgcccctgac | gggcttgtct  | 2460 |
| gctcccggca | tccgcttaca  | gacaagctgt | gaccgtctcc  | gggagctgca  | tgtgtcagag  | 2520 |
| gttttcaccg | tcatacaccga | aacgcgcgag | gcagctgcgg  | taaagctcat  | cagcgtggtc  | 2580 |
| gtgaagcgat | tcacagatgt  | ctgcctgttc | atccgcgtcc  | agctcgttga  | gtttctccag  | 2640 |
| aagcgttaat | gtctggcttc  | tgataaagcg | ggccatgtta  | agggcggttt  | tttctgttt   | 2700 |
| ggtcactgat | gcctccgtgt  | aagggggatt | tctgttcatg  | ggggtaatga  | taccgatgaa  | 2760 |
| acgagagagg | atgctcacga  | tacgggttac | tgatgatgaa  | catgcccggg  | tactggaacg  | 2820 |
| ttgtgagggg | aaacaactgg  | cggtatggat | gcggcggggac | cagagaaaaa  | tcactcaggg  | 2880 |
| tcaatgccag | cgcttcgtta  | atacagatgt | aggtgttcca  | cagggtagcc  | agcagcatcc  | 2940 |
| tgcgatgcag | atccggaaca  | taatggtgca | gggcgctgac  | ttccgcgttt  | ccagacttta  | 3000 |
| cgaaacacgg | aaaccgaaga  | ccattcatgt | tgttgctcag  | gtcgcagacg  | ttttgcagca  | 3060 |
| gcagtcgctt | cacgttcgct  | cgcgtatcgg | tgattcattc  | tgctaaccag  | taaggcaacc  | 3120 |
| ccgccagcct | agccgggtcc  | tcaacgacag | gagcacgatc  | atgcgcaccc  | gtggggccgc  | 3180 |
| catgccggcg | ataatggcct  | gcttctcgcc | gaaacgtttg  | gtggcggggac | cagtgcgaa   | 3240 |
| ggcttgagcg | agggcgtgca  | agattccgaa | taccgcaagc  | gacaggccga  | tcactcgtcg  | 3300 |
| gctccagcga | aagcggctct  | cgccgaaaat | gaccagagc   | gctgccggca  | cctgtcctac  | 3360 |
| gagttgcatg | ataaagaaga  | cagtcataag | tgcggcgacg  | atagtcatgc  | cccgcgcca   | 3420 |
| ccggaaggag | ctgactgggt  | tgaaggctct | caagggcatc  | ggtcgagatc  | ccggtgccta  | 3480 |
| atgagtgagc | taacttacat  | taattgcggt | gcgctcactg  | cccgcttcc   | agtcgggaaa  | 3540 |
| cctgtcgtgc | cagctgcatt  | aatgaatcgg | ccaacgcgcg  | gggagaggcg  | gtttgcgtat  | 3600 |
| tgggcgccag | ggtggttttt  | cttttcacca | gtgagacggg  | caacagctga  | ttgcccttca  | 3660 |

|             |            |            |             |            |             |      |
|-------------|------------|------------|-------------|------------|-------------|------|
| ccgcctggcc  | ctgagagagt | tgcagcaagc | ggtccacgct  | ggtttgcccc | agcaggcgaa  | 3720 |
| aatcctgttt  | gatggtggtt | aacggcggga | tataacatga  | gctgtcttcg | gtatcgtcgt  | 3780 |
| atcccactac  | cgagatgtcc | gcaccaacgc | gcagcccgga  | ctcggtaatg | gcgcgcattg  | 3840 |
| cgcccagcgc  | catctgatcg | ttggcaacca | gcatcgcagt  | gggaacgatg | ccctcattca  | 3900 |
| gcatttgcat  | ggtttgttga | aaaccggaca | tggcactcca  | gtcgccttcc | cgttccgcta  | 3960 |
| tgggtgaat   | ttgattgcga | gtgagatatt | tatgccagcc  | agccagacgc | agacgcgccg  | 4020 |
| agacagaact  | taatgggccc | gctaacagcg | cgatttgctg  | gtgacccaat | gcgaccagat  | 4080 |
| gctccacgcc  | cagtcgcgta | ccgtcttcat | gggagaaaat  | aatactgttg | atgggtgtct  | 4140 |
| ggtcagagac  | atcaagaaat | aacgccggaa | cattagtgca  | ggcagcttcc | acagcaatgg  | 4200 |
| catcctggtc  | atccagcggg | tagttaatga | tcagcccact  | gacgcgttgc | gcgagaagat  | 4260 |
| tgtgcaccgc  | cgctttacag | gcttcgacgc | cgcttcgttc  | taccatcgac | accaccacgc  | 4320 |
| tggcaccag   | ttgatcggcg | cgagatttaa | tcgccgcgac  | aatttgcgac | ggcgcgtgca  | 4380 |
| gggccagact  | ggaggtggca | acgccaatca | gcaacgactg  | tttgcccgcc | agttgttgtg  | 4440 |
| ccacgcggtt  | gggaatgtaa | ttcagctccg | ccatcgcgc   | ttccactttt | tcccgcgttt  | 4500 |
| tcgcagaaac  | gtggctggcc | tggttcacca | cgcgggaaac  | ggtctgataa | gagacaccgg  | 4560 |
| catactctgc  | gacatcgtat | aacgttactg | gtttcacatt  | caccaccctg | aattgactct  | 4620 |
| cttccgggcg  | ctatcatgcc | ataccgcgaa | aggttttgcg  | ccattcgatg | gtgtccggga  | 4680 |
| tctcgaagct  | ctcccttatg | cgactcctgc | attaggaagc  | agcccagtag | taggttgagg  | 4740 |
| ccgttgagca  | ccgccgcgc  | aaggaatggt | gcatgcaagg  | agatggcgcc | caacagtccc  | 4800 |
| ccggccacgg  | ggcctgccac | catacccacg | ccgaaacaag  | cgctcatgag | cccgaagtgg  | 4860 |
| cgagcccgat  | cttccccatc | ggtgatgtcg | gcgatatagg  | cgccagcaac | cgcacctgtg  | 4920 |
| gcgccggtga  | tgccggccac | gatgcgtccg | gcgtagagga  | tcgagatcga | tctcgatccc  | 4980 |
| gcgaaattaa  | tacgactcac | tataggggaa | ttgtgagcgg  | ataacaattc | ccctctagaa  | 5040 |
| ataattttgt  | ttaactttaa | gaaggagata | tacatatggg  | caaagctact | aaactggtac  | 5100 |
| tgggtgccgt  | catcctgggc | tcaacgctgc | tggcgggctg  | ctcgtcaaat | gcgaaaaatcg | 5160 |
| atcaaggat   | caatccgtat | gtcggctttg | aaatgggcta  | tgattggctg | ggtcgtatgc  | 5220 |
| cgtacaaagg  | cagcgttgaa | aacggtgcct | ataaagcaca  | gggctccaa  | ctgaccgcga  | 5280 |
| aactgggtta  | tccgattacc | gatgacctgg | atatctacac  | gcgtctgggc | ggtatggtgt  | 5340 |
| ggcgtgcaga  | caccaaagt  | aacgtttacg | gcaaaaatca  | tgatacgggt | gtttccccgg  | 5400 |
| tctttgccgg  | cgggtgtgaa | tatgcaatta | ccccggaaat  | cgctacgcgt | ctggaatacc  | 5460 |
| agtggaccaa  | caatattggc | gacgcacata | ccatcggtac  | gcgcccggat | aatggcattc  | 5520 |
| cgggtatgta  | taaagacctg | gaaggcaaag | tggttgtcat  | tactggtagc | gctacgggcc  | 5580 |
| tgggtaaagc  | gatggccatc | cgttttgcta | ccgaaaaagc  | gaaagtggtt | gtcaactacc  | 5640 |
| gctcaaaaaga | agaagaagcg | aacagcgtgc | tggaaagaaat | caaaaaagtt | ggcgggtgaag | 5700 |

caatcgctgt caaaggcgac gttacggctcg aaagcgatgt tattaacctg gtccagagtt 5760  
 ccatcaaaga atttggcaaa ctggatgtca tgattaacaa tgcgggtatg gaaaatccgg 5820  
 tgtcatcgca tgaaatgtca ctgtcggact ggaacaaaagt gattgatacc aatctgacgg 5880  
 gcgcttttct gggttcacgt gaagccatca aatacttcgt tgaaaacgat atcaaaggca 5940  
 ccgtcatcaa tatgagctct gtgcatgaaa aaatcccgtg gccgctgttt gtgactatg 6000  
 cggccagcaa aggcggtatg aaactgatga ccaaaaacgct ggccctggaa tacgcaccga 6060  
 aaggatttcg tgtgaacaat atcggccccg gtgcgattaa caccacgatc aataaagaaa 6120  
 aattcgcgga cccggaacag cgcgccgatg ttgaaagtat gattccgatg ggctatatcg 6180  
 gtgaaccgga cgaaattgca gctgttgccg cctggctggc cagttccgaa gcatgctatg 6240  
 tcaccggcat cacgctgttt gccgatggcg gtatgaccca gtacccgagc ttccaagcag 6300  
 gtcgcggtcg actcgagcac caccaccacc accactgaga tccggctgct aacaaagccc 6360  
 gaaaggaagc tgagttggct gctgccaccg ctgagcaata actagcataa ccccttgggg 6420  
 cctctaaacg ggtcttgagg ggttttttgc tgaaaggagg aactatatcc ggat 6474

<210> 5  
 <211> 4439  
 <213> pET23(a)-crs (**pET23(a)-GJCC**)

**Plasmid pET23(a)-GJCC expresses carbonyl reductase from *Candida magnoliae* in the cytoplasm of *E. coli* strain**

tggcgaatgg gacgcgccct gtagcggcgc attaagcgcg gcgggtgtgg tggttacgcg 60  
 cagcgtgacc gctacacttg ccagcgccct agcggcccgt ctttctgctt tcttcccttc 120  
 ctttctcgcc acgttcgccc gctttccccg tcaagctcta aatcgggggc tccctttagg 180  
 gttccgattt agtgctttac ggcacctcga cccccaaaaa cttgattagg gtgatggttc 240  
 acgtagtggg ccatcgccct gatagacggg ttttgcgccct ttgacgttgg agtccacgtt 300  
 ctttaatagt ggactcttgt tccaaactgg aacaacactc aaccctatct cggctatttc 360  
 ttttgattta taagggattt tgccgatttc ggcctattgg ttaaaaaatg agctgattta 420  
 acaaaaattt aacgcgaatt ttaacaaaat attaacgttt acaatttcag gtggcacttt 480  
 tcggggaaat gtgcgcggaa cccctatttg tttatttttc taaatacatt caaatatgta 540  
 tccgctcatg agacaataac cctgataaat gcttcaataa tattgaaaaa ggaagagtat 600  
 gagtattcaa catttccgtg tcgcccttat tccctttttt gcggcatttt gccttctgt 660  
 ttttgctcac ccagaaacgc tggtgaaagt aaaagatgct gaagatcagt tgggtgcacg 720  
 agtgggttac atcgaactgg atctcaacag cggtaaagatc cttgagagtt ttcgccccga 780  
 agaacgtttt ccaatgatga gcacttttaa agttctgcta tgtggcgcgg tattatcccc 840  
 tattgacgcc gggcaagagc aactcggctc ccgcatacac tattctcaga atgacttggg 900  
 tgagtactca ccagtcacag aaaagcatct tacggatggc atgacagtaa gagaattatg 960  
 cagtgctgcc ataaccatga gtgataaacac tgcggccaac ttacttctga caacgatcgg 1020



|            |             |            |             |            |             |      |
|------------|-------------|------------|-------------|------------|-------------|------|
| aggaccgaag | gagctaaccg  | cttttttgca | caacatgggg  | gatcatgtaa | ctcgccttga  | 1080 |
| tcgttgggaa | ccggagctga  | atgaagccat | accaaacgac  | gagcgtgaca | ccacgatgcc  | 1140 |
| tgcagcaatg | gcaacaacgt  | tgcgcaaact | attaactggc  | gaactactta | ctctagcttc  | 1200 |
| ccggcaacaa | ttaatagact  | ggatggaggc | ggataaagtt  | gcaggaccac | ttctgcgctc  | 1260 |
| ggcccttccg | gctggctggt  | ttattgctga | taaatctgga  | gccggtgagc | gtgggtctcg  | 1320 |
| cggtatcatt | gcagcactgg  | ggccagatgg | taagccctcc  | cgtatcgtag | ttatctacac  | 1380 |
| gacggggagt | caggcaacta  | tggatgaacg | aaatagacag  | atcgctgaga | taggtgcctc  | 1440 |
| actgattaag | cattggtaac  | tgtcagacca | agtttactca  | tatatacttt | agattgattt  | 1500 |
| aaaacttcat | ttttaattta  | aaaggatcta | ggatgaagatc | ctttttgata | atctcatgac  | 1560 |
| caaaatccct | taacgtgagt  | tttcgttcca | ctgagcgtca  | gaccccgtag | aaaagatcaa  | 1620 |
| aggatcttct | tgagatcctt  | tttttctgcg | cgtaatctgc  | tgcttgcaaa | caaaaaaacc  | 1680 |
| accgctacca | gcggtggttt  | gtttgccgga | tcaagagcta  | ccaactcttt | ttccgaaggt  | 1740 |
| aactggcttc | agcagagcgc  | agataccaaa | tactgtcctt  | ctagtgtagc | cgtagttagg  | 1800 |
| ccaccacttc | aagaactctg  | tagcaccgcc | tacatacctc  | gctctgctaa | tcctgttacc  | 1860 |
| agtggctgct | gccagtggcg  | ataagtctg  | tcttaccggg  | ttggactcaa | gacgatagtt  | 1920 |
| accggataag | gcgcagcggg  | cgggctgaac | ggggggttcg  | tgcacacagc | ccagcttggg  | 1980 |
| gcgaacgacc | tacaccgaac  | tgagatacct | acagcgtgag  | ctatgagaaa | gcgccacgct  | 2040 |
| tcccgaaggg | agaaaggcgg  | acaggtatcc | ggtaagcggc  | agggtcggaa | caggagagcg  | 2100 |
| cacgagggag | cttccagggg  | gaaacgcctg | gtatctttat  | agtcctgtcg | ggtttcgcca  | 2160 |
| cctctgactt | gagcgtcgat  | ttttgtgatg | ctcgtcaggg  | gggcggagcc | tatggaaaaa  | 2220 |
| cgccagcaac | gcggcctttt  | tacggttctt | ggccttttgc  | tggccttttg | ctcacatggt  | 2280 |
| ctttcctgcg | ttatcccctg  | attctgtgga | taaccgtatt  | accgcctttg | agtgagctga  | 2340 |
| taccgctcgc | cgcagccgaa  | cgaccgagcg | cagcaggtca  | gtgagcgagg | aagcgggaaga | 2400 |
| gcgcctgatg | cggtattttc  | tccttacgca | tctgtgcggg  | atttcacacc | gcatatatgg  | 2460 |
| tgcactctca | gtacaatctg  | ctctgatgcc | gcatagttaa  | gccagtatac | actccgctat  | 2520 |
| cgctacgtga | ctgggtcatg  | gctgcgcccc | gacaccgcgc  | aacaccgcct | gacgcgcctt  | 2580 |
| gacgggcttg | tctgctcccg  | gcatccgctt | acagacaagc  | tgtgaccgtc | tccgggagct  | 2640 |
| gcatgtgtca | gaggttttca  | ccgtcatcac | cgaaacgcgc  | gaggcagctg | cggtaaagct  | 2700 |
| catcagcgtg | gtcgtgaagc  | gattcacaga | tgtctgcctg  | ttcatccgcg | tccagctcgt  | 2760 |
| tgagtttctc | cagaagcgtt  | aatgtctggc | ttctgataaa  | gcgggccatg | ttaagggcgg  | 2820 |
| tttttctctg | tttggctcact | gatgcctccg | tgtaaggggg  | atctctgttc | atgggggtaa  | 2880 |
| tgataccgat | gaaacgagag  | aggatgctca | cgatacgggt  | tactgatgat | gaacatgccc  | 2940 |
| ggttactgga | acgttgtgag  | ggtaaacaac | tggcggatg   | gatgcggcgg | gaccagagaa  | 3000 |
| aaatcactca | gggtcaatgc  | cagcgttctg | ttaatacaga  | tgtaggtggt | ccacagggta  | 3060 |

gccagcagca tcctgcatg cagatccgga acataatggt gcagggcgct gacttccgcg 3120  
tttccagact ttacgaaaca cggaaaccga agaccattca tgttggtgct caggtcgcag 3180  
acgttttgca gcagcagtcg cttcacggtc gctcgcgtat cggtgattca ttctgctaac 3240  
cagtaaggca accccgccag cctagccggg tcctcaacga caggagcacg atcatgcyca 3300  
cccgtggcca ggaccaaacg ctgcccgaga tctcgatccc gcgaaattaa tacgactcac 3360  
tatagggaga ccacaacggt ttccctctag aaataatddd gtttaacttt aagaaggaga 3420  
tatacatatg gcgaaaaact tctctaattgt ggaatatccg gcaccgccgc cggcacacac 3480  
caaaaacgaa agcctgcaag tgctggatct gtttaaactg aatggcaaag ttgctctat 3540  
tacgggtagc tctagtggca tcggttatgc gctggccgaa gcattcgcctc aagttggcgc 3600  
tgacgtcgcg atttggtaca acagccacga tgcgaccggc aaagcgggaag cgctggcgaa 3660  
aaaatatggt gttaaagtca aagcctaca agcaaagtgc tcctcatcgg atgccgtgaa 3720  
acagaccatt gaacagcaaa tcaaagactt tggccatctg gatattgtgg ttgctaacgc 3780  
gggcatcccg tggacgaagg gtgcttatat tgaccaggat gacgataaac acttcgatca 3840  
agtcgtggac gtggatctga aaggcgtggg ttacgttgct aaacatgcgg gtcgtcactt 3900  
tcgtgaacgc ttcgaaaaag aaggcaaaaa aggtgccctg gtttttaccg catcaatgtc 3960  
gggcatatc gtgaacggtc cgcagttcca agccacgtat aatgcggcca aagcaggtgt 4020  
ccgtcacttt gctaaaagtc tggcggtgga atttgccccg ttcgcacgcg tcaacagcgt 4080  
gtctccgggc tacatcaaca ccgaaatctc agatctcgtt ccgcaggaaa cgcaaaataa 4140  
atggtggtcg ctggtcccgc tgggtcgcgg cggtgaaacc gctgaaactg ttggtgcyta 4200  
tctgttcctg gcttcagacg caggctcgtc cgcgaccggc acggacatta tcgtggatgg 4260  
cggttatacg ctgcccctcg agcaccacca ccaccaccac tgagatccgg ctgctaacia 4320  
agcccgaag gaagctgagt tggctgctgc caccgctgag caataactag cataaccct 4380  
tggggcctct aaacgggtct tgaggggttt tttgctgaaa ggaggaacta tatccggat 4439

<210> 6  
<211> 6021  
<213> pET29(a)-gdh (pET29(a)-GJCG)

**Plasmid pET29(a)-GJCG expresses glucose dehydrogenase in the cytoplasm of *E. coli* strain**

tggcgaatgg gacgcgccct gtagcggcgc attaagcgcg gcgggtgtgg tggttacgcg 60  
cagcgtgacc gctacacttg ccagcgcctc agcgcgccct cctttcgtt tcttcccttc 120  
ctttctcgcc acgttcgccc gctttccccg tcaagctcta aatcgggggc tccctttagg 180  
gttccgattt agtgctttac ggcacctcga cccccaaaaa cttgattagg gtgatggttc 240  
acgtagtggg ccatcgccct gatagacggc ttttcgccct ttgacgttgg agtccacgct 300  
ctttaatagt ggactcttgt tccaaactgg aacaacactc aaccctatct cggctctattc 360  
ttttgattta taagggattt tgcccatttc ggcctattgg ttaaaaaatg agctgattta 420

|            |             |             |             |             |            |      |
|------------|-------------|-------------|-------------|-------------|------------|------|
| acaaaaat   | aacgcgaatt  | ttaacaaaat  | attaacgttt  | acaatttcag  | gtggcacttt | 480  |
| tcggggaaat | gtgcgcggaa  | cccctat     | tttatttttc  | taaatacatt  | caaatatgta | 540  |
| tccgctcatg | aattaattct  | tagaaaaact  | catcgagcat  | caaatagaaac | tgcaatttat | 600  |
| tcatatcagg | attatcaata  | ccatattttt  | gaaaaagccg  | tttctgtaat  | gaaggagaaa | 660  |
| actcaccgag | gcagttccat  | aggatggcaa  | gatcctggta  | tcggtctgcg  | attccgactc | 720  |
| gtccaacatc | aatacaacct  | attaatttcc  | cctcgtcaaa  | aataaggtta  | tcaagtgaga | 780  |
| aatcaccatg | agtgacgact  | gaatccgggtg | agaatggcaa  | aagtttatgc  | atttctttcc | 840  |
| agacttgttc | aacagggccag | ccattacgct  | cgtcatcaaa  | atcactcgca  | tcaaccaaac | 900  |
| cgttattcat | tcgtgattgc  | gcctgagcga  | gacgaaatac  | gcgatcgctg  | ttaaaaggac | 960  |
| aattacaaac | aggaatcgaa  | tgcaaccggc  | gcaggaacac  | tgccagcgca  | tcaacaatat | 1020 |
| tttcacctga | atcaggatat  | tcttctaata  | cctggaatgc  | tgttttcccg  | gggatcgag  | 1080 |
| tggtgagtaa | ccatgcatca  | tcaggagtac  | ggataaaatg  | cttgatggtc  | ggaagaggca | 1140 |
| taaattccgt | cagccagttt  | agtctgacca  | tctcatctgt  | aacatcattg  | gcaacgctac | 1200 |
| ctttgccatg | tttcagaaac  | aactctggcg  | catcgggctt  | cccatacaat  | cgatagattg | 1260 |
| tcgcacctga | ttgcccgaca  | ttatcgcgag  | cccatttata  | cccatataaa  | tcagcatcca | 1320 |
| tgttggaatt | taatcgcggc  | ctagagcaag  | acgtttcccg  | ttgaatatgg  | ctcataacac | 1380 |
| cccttgatt  | actgtttatg  | taagcagaca  | gttttattgt  | tcatgaccaa  | aatcccttaa | 1440 |
| cgtgagtttt | cgttccactg  | agcgtcagac  | cccgtagaaa  | agatcaaagg  | atcttcttga | 1500 |
| gatccttttt | ttctgcgcgt  | aatctgctgc  | ttgcaaacia  | aaaaaccacc  | gctaccagcg | 1560 |
| gtggtttggt | tgccggatca  | agagctacca  | actctttttc  | cgaaggtaac  | tggttcagc  | 1620 |
| agagcgcaga | taccaaatac  | tgtccttcta  | gtgtagccgt  | agttaggcca  | ccacttcaag | 1680 |
| aactctgtag | caccgcctac  | atacctcgct  | ctgctaatac  | tgttaccagt  | ggctgctgcc | 1740 |
| agtggcgata | agtcgtgtct  | taccgggttg  | gactcaagac  | gatagttacc  | ggataaggcg | 1800 |
| cagcggtcgg | gctgaacggg  | gggttcgtgc  | acacagccca  | gcttggagcg  | aacgacctac | 1860 |
| accgaactga | gatacctaca  | gcgtgagcta  | tgagaaaagcg | ccacgcttcc  | cgaagggaga | 1920 |
| aaggcggaca | ggtatccggt  | aagcggcagg  | gtcggaacag  | gagagcgcac  | gagggagctt | 1980 |
| ccagggggaa | acgcctggta  | tctttatagt  | cctgtcgggt  | ttcgccacct  | ctgacttgag | 2040 |
| cgtcgat    | ttgtgatgctc | gtcagggggg  | cggagcctat  | ggaaaaacgc  | cagcaacgcg | 2100 |
| gcctttttac | ggttcctggc  | cttttgctgg  | ccttttgctc  | acatgttctt  | tctgctgta  | 2160 |
| tcccctgatt | ctgtggataa  | ccgtattacc  | gcctttgagt  | gagctgatac  | cgctcgccgc | 2220 |
| agccgaacga | ccgagcgcag  | cgagtcagtg  | agcgaggaag  | cggaaagagcg | cctgatgcgg | 2280 |
| tattttctcc | ttacgcatct  | gtgcgggtatt | tcacaccgca  | tatatgggtgc | actctcagta | 2340 |
| caatctgctc | tgatgccgca  | tagttaagcc  | agtatacact  | ccgctatcgc  | tacgtgactg | 2400 |
| ggtcatggct | gcgccccgac  | acccgccaac  | acccgctgac  | gcgccctgac  | gggcttgtct | 2460 |

|            |             |            |             |            |             |      |
|------------|-------------|------------|-------------|------------|-------------|------|
| gctcccggca | tccgcttaca  | gacaagctgt | gaccgtctcc  | gggagctgca | tgtgtcagag  | 2520 |
| gttttcaccg | tcatcaccga  | aacgcgcgag | gcagctgcgg  | taaagctcat | cagcgtggtc  | 2580 |
| gtgaagcgat | tcacagatgt  | ctgcctgttc | atccgcgtcc  | agctcgttga | gtttctccag  | 2640 |
| aagcgttaat | gtctggcttc  | tgataaagcg | ggccatgtta  | agggcggttt | tttctgttt   | 2700 |
| ggtcactgat | gcctccgtgt  | aagggggatt | tctgttcatg  | gggtaatga  | taccgatgaa  | 2760 |
| acgagagagg | atgctcacga  | tacgggttac | tgatgatgaa  | catgcccggt | tactggaacg  | 2820 |
| ttgtgagggg | aaacaactgg  | cggtatggat | gcggcgggac  | cagagaaaaa | tcactcaggg  | 2880 |
| tcaatgccag | cgcttcgtta  | atacagatgt | aggtgttcca  | cagggtagcc | agcagcatcc  | 2940 |
| tgcgatgcag | atccggaaca  | taatggtgca | gggcgctgac  | ttccgcgttt | ccagacttta  | 3000 |
| cgaaacacgg | aaaccgaaga  | ccattcatgt | tgttgctcag  | gtcgcagacg | ttttgcagca  | 3060 |
| gcagtcgctt | cacgttcgct  | cgcgtatcgg | tgattcattc  | tgctaaccag | taaggcaacc  | 3120 |
| ccgccagcct | agccgggtcc  | tcaacgacag | gagcacgatc  | atgcgcaccc | gtggggccgc  | 3180 |
| catgccggcg | ataatggcct  | gcttctcgcc | gaaacgtttg  | gtggcgggac | cagtgacgaa  | 3240 |
| ggcttgagcg | agggcgtgca  | agattccgaa | taccgcaagc  | gacaggccga | tcatcgtcgc  | 3300 |
| gctccagcga | aagcggctct  | cgccgaaaat | gaccagagc   | gctgccggca | cctgtcctac  | 3360 |
| gagttgcatg | ataaagaaga  | cagtcataag | tgccggcagc  | atagtcatgc | cccgcgcca   | 3420 |
| ccggaaggag | ctgactgggt  | tgaaggctct | caagggcatc  | ggtcgagatc | ccggtgccta  | 3480 |
| atgagtgagc | taacttacat  | taattgcgtt | gcgctcactg  | cccgccttcc | agtcgggaaa  | 3540 |
| cctgtcgtgc | cagctgcatt  | aatgaatcgg | ccaacgcgcg  | gggagaggcg | gtttgcgtat  | 3600 |
| tgggcgccag | ggtggttttt  | cttttcacca | gtgagacggg  | caacagctga | ttgcccttca  | 3660 |
| ccgcctggcc | ctgagagagt  | tgcagcaagc | ggfccacgct  | ggtttgcccc | agcaggcgaa  | 3720 |
| aatcctgttt | gatggtgggt  | aacggcggga | tataacatga  | gctgtcttcg | gtatcgtcgt  | 3780 |
| atcccactac | cgagatgtcc  | gcaccaacgc | gcagcccgga  | ctcggtaatg | gcgcgcattg  | 3840 |
| cgcccagcgc | catctgatcg  | ttggcaacca | gcacgcagct  | gggaacgatg | ccctcattca  | 3900 |
| gcatttgcat | ggtttggtga  | aaaccggaca | tggcactcca  | gtcgccttcc | cgttccgcta  | 3960 |
| tcggctgaat | ttgattgcga  | gtgagatatt | tatgccagcc  | agccagacgc | agacgcgccg  | 4020 |
| agacagaact | taatgggccc  | gctaacagcg | cgatttgctg  | gtgacccaat | gcgaccagat  | 4080 |
| gctccacgcc | cagtcgcgta  | ccgtcttcat | gggagaaaaat | aatactgttg | atgggtgtct  | 4140 |
| ggtcagagac | atcaagaaat  | aacgccggaa | cattagtgca  | ggcagcttcc | acagcaatgg  | 4200 |
| catcctggtc | atccagcggga | tagttaatga | tcagcccact  | gacgcgttgc | gcgagaagat  | 4260 |
| tgtgcaccgc | cgctttacag  | gcttcgacgc | cgcttcgttc  | taccatcgac | accaccacgc  | 4320 |
| tggcaccag  | ttgatcggcg  | cgagatttaa | tcgccgcgac  | aatttgcgac | ggcgcgtgca  | 4380 |
| gggccagact | ggaggtggca  | acgccaatca | gcaacgactg  | tttgcccgcc | agttgttggtg | 4440 |
| ccacgcgggt | gggaatgtaa  | ttcagctccg | ccatcgcgcg  | ttccactttt | tcccgcgttt  | 4500 |

|            |            |            |             |            |            |      |
|------------|------------|------------|-------------|------------|------------|------|
| tgcgagaaac | gtggctggcc | tggttcacca | cgcgggaaac  | ggtctgataa | gagacaccgg | 4560 |
| catactctgc | gacatcgtat | aacgttactg | gtttcacatt  | caccaccctg | aattgactct | 4620 |
| cttccgggcg | ctatcatgcc | ataccgcgaa | aggttttgcg  | ccattcgatg | gtgtccggga | 4680 |
| tctcgacgct | ctcccttatg | cgactcctgc | attaggaagc  | agcccagtag | taggttgagg | 4740 |
| ccgttgagca | ccgccgccgc | aaggaatggt | gcatgcaagg  | agatggcgcc | caacagtccc | 4800 |
| ccggccacgg | ggcctgccac | catacccacg | ccgaaacaag  | cgctcatgag | cccgaagtgg | 4860 |
| cgagcccgat | cttccccatc | ggtgatgtcg | gcgatatagg  | cgccagcaac | cgcacctgtg | 4920 |
| gcgccggtga | tgccggccac | gatgcgtccg | gcgtagagga  | tcgagatcga | tctcgatccc | 4980 |
| gcgaaattaa | tacgactcac | tataggggaa | ttgtgagcgg  | ataacaattc | ccctctagaa | 5040 |
| ataatdddgt | ttaactttaa | gaaggagata | tacatatgta  | taaagacctg | gaaggcaaag | 5100 |
| tggttgtcat | taccggtagc | tctacgggcc | tgggtaaagc  | gatggccatc | cgtdddgcta | 5160 |
| ccgaaaaagc | gaaagtgggt | gtcaactacc | gctcaaaaaga | agaagaagcg | aacagcgtgc | 5220 |
| tggaagaaat | caaaaaagtt | ggcggggaag | caatcgctgt  | caaaggcgac | gttacggctg | 5280 |
| aaagcgatgt | tattaacctg | gtccagagtt | ccatcaaaga  | attdggcaaa | ctggatgtca | 5340 |
| tgattaacaa | tgcgggtatg | gaaaatccgg | tgtcatcgca  | tgaaatgtca | ctgtcggact | 5400 |
| ggaacaaagt | gattgatacc | aatctgacgg | gcgctdddct  | gggttcacgt | gaagccatca | 5460 |
| aatacttcgt | tgaaaacgat | atcaaaggca | ccgtcatcaa  | tatgagctct | gtgcatgaaa | 5520 |
| aaatcccgtg | gccgctgddd | gtgcactatg | cgccagcaaa  | aggcggatg  | aaactgatga | 5580 |
| ccgaaacgct | ggccctggaa | tacgcaccga | aaggatattcg | tgtgaacaat | atcggcccgg | 5640 |
| gtgcgattaa | caccccgatc | aatgctgaaa | aattcgcgga  | cccggaacag | cgcgccgatg | 5700 |
| ttgaaagtat | gattccgatg | ggctatatcg | gtgaaccgga  | agaaattgca | gctgtdtggg | 5760 |
| cctggctggc | cagttccgaa | gcatcctatg | tcaccggcat  | cacgctgddd | gccgatggcg | 5820 |
| gtatgaccca | gtacccgagc | ttccaagcag | gtcgcggcct  | cgagcaccac | caccaccacc | 5880 |
| actgagatcc | ggctgctaac | aaagcccgaa | aggaagctga  | gtdggctgct | gccaccgctg | 5940 |
| agcaataact | agcataacct | cttggggcct | ctaaacgggt  | cttgaggggt | tddddgtgta | 6000 |
| aaggaggaac | tatatccgga | t          |             |            |            | 6021 |

<210> 7  
 <211> 1299  
 <213> omp-crs

|            |            |            |            |            |            |     |
|------------|------------|------------|------------|------------|------------|-----|
| atgaaagcta | ctaaactggt | actgggtgcc | gtcatcctgg | gctcaacgct | gctggcgggc | 60  |
| tgctcgtcaa | atgcaaaaat | cgatcaaggt | atcaatccgt | atgtcggctt | tgaaatgggc | 120 |
| tatgattggc | tgggtcgtat | gccgtacaaa | ggcagcgttg | aaaacggtgc | ctataaagca | 180 |
| cagggcgctc | aactgaccgc | gaaactgggt | tatccgatta | ccgatgacct | ggatatctac | 240 |
| acgcgtctgg | gcggatggt  | gtggcgtgca | gacaccaaaa | gtaacgttta | cggcaaaaat | 300 |

|             |            |             |             |             |            |      |
|-------------|------------|-------------|-------------|-------------|------------|------|
| catgatacgg  | gtgtttcccc | ggtctttgcc  | ggcgggtg    | aatatgcaat  | taccccggaa | 360  |
| atcgctacgc  | gtctggaata | ccagtggacc  | aacaatattg  | gcgacgcaca  | taccatcgg  | 420  |
| acgcgccccg  | ataatggcat | tccgggtatg  | gcgaaaaact  | tctctaattg  | ggaatatccg | 480  |
| gcaccgcccgc | cggcacacac | caaaaacgaa  | agcctgcaag  | tgctggatct  | gtttaaactg | 540  |
| aatggcaaaag | ttgcgtctat | tacgggtagc  | tctagtggca  | tcggttatgc  | gctggccgaa | 600  |
| gcattcgcctc | aagttggcgc | tgacgtcgcg  | atctgggtaca | acagccacga  | tgcgaccggc | 660  |
| aaagcggaaag | cgctggcgaa | aaaatatggt  | gttaaagtca  | aagcctacaa  | agcaaatgtc | 720  |
| tcctcatcgg  | atgccgtgaa | acagaccatt  | gaacagcaaa  | tcaaagactt  | tggccatctg | 780  |
| gatattgtgg  | ttgctaacgc | gggcatccccg | tggacgaagg  | gtgcgtatat  | tgaccaggat | 840  |
| gacgataaac  | acttcgatca | agtcgtggac  | gtggatctga  | aaggcgtggg  | ttacgttgct | 900  |
| aaacatgcgg  | gtcgtcactt | tcgtgaacgc  | ttcgaaaaag  | aaggcaaaaa  | aggtgccctg | 960  |
| gtttttaccg  | catcaatgtc | gggccatatac | gtgaacgttc  | cgcagttcca  | agccacgtat | 1020 |
| aatgcggcca  | aagcaggtgt | ccgtcacttt  | gctaaaagt   | tggcgggtgga | atctgccccg | 1080 |
| ttcgcacgcg  | tcaacagcgt | gtctccgggc  | tacatcaaca  | ccgaaatctc  | agatttcg   | 1140 |
| ccgcaggaaa  | cgcaaaataa | atggtggctg  | ctgggtccgc  | tgggtcgcgg  | cggtgaaacc | 1200 |
| gctgaactgg  | ttggtgcgta | tctgttcctg  | gcttcagacg  | caggctcgta  | cgcgaccgg  | 1260 |
| acggacatta  | tcgtggatgg | cggttatacg  | ctgccgtaa   |             |            | 1299 |

<210> 8  
 <211> 849  
 <213> crs

|             |            |             |            |            |             |     |
|-------------|------------|-------------|------------|------------|-------------|-----|
| atggcgaaaa  | acttctctaa | tgtggaatat  | ccggcaccgc | cgccggcaca | cacaaaaaac  | 60  |
| gaaagcctgc  | aagtgctgga | tctgtttaaa  | ctgaatggca | aagttgcg   | tattacgggt  | 120 |
| agctctagtg  | gcatcgggta | tgcgctggcc  | gaagcattcg | ctcaagttgg | cgctgacg    | 180 |
| gcgatttgg   | acaacagcca | cgatgcgacc  | ggcaaagcgg | aagcgtggc  | gaaaaaatat  | 240 |
| ggtgttaaag  | tcaaagccta | caaagcaaat  | gtctcctcat | cggatgccgt | gaaacagacc  | 300 |
| attgaacagc  | aatcaaaga  | ctttggccat  | ctggatattg | tggttgctaa | cgcgggcatc  | 360 |
| ccgtggacga  | agggtgcgta | tattgaccag  | gatgacgata | aacacttcga | tcaagtcgtg  | 420 |
| gacgtggatc  | tgaaaggcgt | gggttacg    | gctaaacatg | cgggtcgtca | ctttcgtgaa  | 480 |
| cgcttcgaaa  | aagaaggcaa | aaaagggtgcc | ctggttttta | ccgcatcaat | gtcggggccat | 540 |
| atcgtgaacg  | ttccgcagtt | ccaagccacg  | tataatgcgg | caaagcagg  | tgtccgtcac  | 600 |
| tttgctaaaa  | gtctggcggt | ggaatttgcc  | ccgttcgcac | gctcaacag  | cgtgtctccg  | 660 |
| ggctacatca  | acaccgaaat | ctcagatttc  | gttccgcagg | aaacgcaaaa | taaattggtg  | 720 |
| tcgctgggtcc | cgctgggtcg | cggcggtgaa  | accgctgaac | tggttggtgc | gtatctgttc  | 780 |
| ctggcttcag  | acgcaggctc | gtacgcgacc  | ggtacggaca | ttatcgtgga | tggcggttat  | 840 |
| acgctgccc   |            |             |            |            |             | 849 |

<210> 9  
<211> 1233  
<213> omp-gdh

atgaaagcta cgaaactggg tctgggtgct gttattctgg gttcaacgct gctggcgggc 60  
tgctcctcaa atgcgaaaaat cgaccaaggc attaaccctg atgtgggctt tgaaatgggt 120  
tacgattggc tgggtcgtat gccgtataaa ggcagtgttg aaaatgggtgc ctacaaagca 180  
cagggcgctc aactgaccgc aaaactgggt tatccgatta ccgatgacct ggatatctac 240  
acgcgctctgg gcggtatggg gtggcgtgca gataccaaaa gcaacgttta tggcaaaaaat 300  
catgacacgg gtgtttctcc ggtctttgcy ggcggtgtgg aatatgccat taccocggaa 360  
atcgcaacgc gtctggaata ccagtggacc aacaatattg gtgacgcaca caccatcggg 420  
acgcgctccgg ataacggcat tccgggcatg tataaagacc tggaaaggcaa agtgggtgtc 480  
attaccggta gctctacggg cctgggtaaa gcgatggcca tccgttttgc taccgaaaaa 540  
gcgaaagtgg ttgtcaacta ccgctcaaaa gaagaagaag cgaacagcgt gctggaagaa 600  
atcaaaaaag ttggcgggtga agcaatcgtc gtcaaaggcg acgttacggg cgaaagcgat 660  
gttattaacc tgggtccagag ttccatcaaa gaatttggca aactggatgt catgattaac 720  
aatgcgggta tggaaaatcc ggtgtcatcg catgaaatgt cactgtcggc ctggaacaaa 780  
gtgattgata ccaatctgac gggcgctttt ctgggttcac gtgaagccat caaatacttc 840  
gttgaaaacg atatcaaagg caccgtcatc aatatgagct ctgtgcatga aaaaatcccg 900  
tggccgctgt ttgtgcaacta tgcggccagc aaaggcggta tgaaactgat gaccgaaacg 960  
ctggccctgg aatacgcacc gaaaggattt cgtgtgaaca atatcggccc ggggtgcgatt 1020  
aacaccccga tcaatgctga aaaattcgcg gaccocggaac agcgcgccga tgttgaaagt 1080  
atgattccga tgggtatatat cgggtgaaccg gaagaaattg cagctgttgc ggctggctg 1140  
gccagttccg aagcatccta tgtcaccggc atcacgctgt ttgccgatgg cggtatgacc 1200  
cagtaccga gcttccaagc aggtcgcggc taa 1233

<210> 10  
<211> 783  
<213> gdh

atgtataaag acctggaagg caaagtgggt gtcattaccg gtagctctac gggcctgggt 60  
aaagcgatgg ccatccgttt tgctaccgaa aaagcgaaaag tggttgtcaa ctaccgctca 120  
aaagaagaag aagcgaacag cgtgctggaa gaaatcaaaa aagttggcgg tgaagcaatc 180  
gctgtcaaag gcgacgttac ggtcgaaagc gatgttatta acctggtcca gagttccatc 240  
aaagaatttg gcaactgga tgtcatgatt aacaatgcgg gtatggaaaa tccggtgtca 300  
tcgcatgaaa tgtcactgtc ggactggaac aaagtgattg ataccaatct gacgggcgct 360  
tttctggggt cacgtgaagc catcaaatac ttcggtgaaa acgatatcaa aggcaccgct 420  
atcaatatga gctctgtgca tgaaaaaatc ccgtggccgc tgtttgtgca ctatgcggcc 480

|                                                                   |     |
|-------------------------------------------------------------------|-----|
| agcaaaggcg gtatgaaact gatgaccgaa acgctggccc tggaatacgc accgaaaggt | 540 |
| attcgtgtga acaatatcgg cccgggtgcg attaacaccc cgatcaatgc tgaaaaattc | 600 |
| gcggaaccgg aacagcgcgc cgatggtgaa agtatgattc cgatgggcta tatcggtgaa | 660 |
| ccggaagaaa ttgcagctgt tgcggcctgg ctggccagtt ccgaagcatc ctatgtcacc | 720 |
| ggcatcacgc tgtttgccga tggcggtatg acccagtacc cgagcttcca agcaggtcgc | 780 |
| ggc                                                               | 783 |

## 8. Reference Section

- 1 M. Wada, M. Kataoka, H. Kawabata, Y. Yasohara, N. Kizaki, J. Hasegawa, S. Shimizu, *Biosci. Biotechnol. Biochem.*, 1998, **62**, 280.
- 2 (a) J. P. Horwitz, J. Chua, M. Noel, J. T. Donatti, J. Freisler, *J. Med. Chem.*, 1966, **9**, 447-447; (b) M. S. Blake, K. H. Johnston, G. J. Russell-Jones, E. C. Gotschlich, *Anal. Biochem.*, 1984, **136**, 175-179.
- 3 J. Sambrook, E. F. Fritsch, T. Maniatis, *Molecular Cloning. A Laboratory Manual, 2nd ed.*, 1989.
- 4 (a) W. Hilt, G. Pfeleiderer, P. Fortnagel, *Biochim. Biophys. Acta (BBA) - Prot. Struct. Mol. Enzym.*, 1991, **1076**, 298; (b) M. Kataoka, L. P. Sri Rohani, M. Wada, K. Kita, H. Yanase, I. Urabe, S. Shimizu, *Biosci. Biotechnol., and Biochem.*, 1998, **62**, 167.
- 5 J. P. Marino, M. S. McClure, D. P. Holub, J. V. Comasseto, F. C. Tucci, *J. Am. Chem. Soc.*, 2002, **124**, 1664.
- 6 I. A. Kaluzna, B. D. Feske, W. Wittayanan, I. Ghiviriga and J. D. Stewart, *J. Org. Chem.*, 2005, **70**, 342.
- 7 J. S. Yadav, S. Nanda, P. T. Reddy, A. B. Rao, *J. Org. Chem.*, 2002, **67**, 3900.
- 8 S.-i. Fukuzawa, H. Matsuzawa, S.-i. Yoshimitsu, *J. Org. Chem.*, 2000, **65**, 1702.
- 9 C. J. Sih, B.-N. Zhou, A. S. Gopalan, W.-R. Shieh, C.-S. Chen, G. Girdaukas, F. Vanmiddlesworth, *Annals New York Acad. Sci.*, 1984, **434**, 186.
- 10 Paolo Davoli, Arrigo Forni, Irene Moretti, Fabio Prati, Giovanni Torre, *Enzyme Microbial. Technol.*, 1999, **25**, 149.
- 11 M. B. Carter, B. Schiott, A. Gutierrez, S. L. Buchwald, *J. Am. Chem. Soc.*, 1994, **116**, 11667.
- 12 K. Nakamura, T. Matsuda, *J. Org. Chem.* **1998**, **63**, 8957-8964.
- 13 U. K. Laemmli, *Nature* 1970, **227**, 680.
